# Degeneracy in hippocampal physiology and plasticity

**Rahul Kumar Rathour and Rishikesh Narayanan\***

*Cellular Neurophysiology Laboratory, Molecular Biophysics Unit, Indian Institute of Science,  
Bangalore, India.*

## **\* Corresponding Author**

Rishikesh Narayanan, Ph.D.  
Molecular Biophysics Unit  
Indian Institute of Science  
Bangalore 560 012, India.

e-mail: [rishi@iisc.ac.in](mailto:rishi@iisc.ac.in)  
Phone: +91-80-22933372  
Fax: +91-80-23600535

**Abbreviated title:** Degeneracy in the hippocampus

**Keywords:** hippocampus; degeneracy; learning; memory; encoding; homeostasis; plasticity; physiology; causality; reductionism; holism; structure-function relationships; variability; compensation; intrinsic excitability

## ABSTRACT

Degeneracy, defined as the ability of structurally disparate elements to perform analogous function, has largely been assessed from the perspective of maintaining robustness of physiology or plasticity. How does the framework of degeneracy assimilate into an encoding system where the ability to change is an essential ingredient for storing new incoming information? Could degeneracy maintain the balance between the apparently contradictory goals of the need to change for encoding and the need to resist change towards maintaining homeostasis? In this review, we explore these fundamental questions with the mammalian hippocampus as an example encoding system. We systematically catalog lines of evidence, spanning multiple scales of analysis, that demonstrate the expression of degeneracy in hippocampal physiology and plasticity. We assess the potential of degeneracy as a framework to achieve the conjoint goals of encoding and homeostasis without cross-interferences. We postulate that biological complexity, involving interactions among the numerous parameters spanning different scales of analysis, could establish disparate routes towards accomplishing these conjoint goals. These disparate routes then provide several degrees of freedom to the encoding-homeostasis system in accomplishing its tasks in an input- and state-dependent manner. Finally, the expression of degeneracy spanning multiple scales offers an ideal reconciliation to several outstanding controversies, through the recognition that the seemingly contradictory disparate observations are merely alternate routes that the system might recruit towards accomplishment of its goals. Against the backdrop of the ubiquitous prevalence of degeneracy and its strong links to evolution, it is perhaps apt to add a corollary to Theodosius Dobzhansky's famous quote and state "nothing in physiology makes sense except in the light of degeneracy".

## Highlights

- Degeneracy is the ability of structurally distinct elements to yield similar function
- We postulate a critical role for degeneracy in the emergence of stable encoding systems
- We catalog lines of evidence for the expression of degeneracy in the hippocampus
- We suggest avenues for research to explore degeneracy in stable encoding systems
- Dobzhansky wrote: “nothing in biology makes sense except in the light of evolution”
- A corollary: “nothing in physiology makes sense except in the light of degeneracy”

## TABLE OF CONTENTS

|                                                                                                                      |           |
|----------------------------------------------------------------------------------------------------------------------|-----------|
| <b>1. Introduction .....</b>                                                                                         | <b>5</b>  |
| <b>2. Degeneracy: Foundations from the perspective of an encoding system .....</b>                                   | <b>8</b>  |
| 2.1. <i>Degeneracy vs. compensation</i> .....                                                                        | 10        |
| 2.2. <i>Dissociation between different forms of homeostasis</i> .....                                                | 15        |
| 2.3. <i>Baseline vs. plasticity profile homeostasis</i> .....                                                        | 17        |
| 2.4. <i>Encoding and homeostasis within the degeneracy framework</i> .....                                           | 20        |
| 2.5. <i>Curse-of-dimensionality or evolutionary robustness</i> .....                                                 | 22        |
| 2.6. <i>Error correction mechanisms</i> .....                                                                        | 24        |
| <b>3. Degeneracy at multiple scales in the hippocampus.....</b>                                                      | <b>27</b> |
| 3.1. <i>Degeneracy in the properties of channels and receptors</i> .....                                             | 29        |
| 3.2. <i>Degeneracy in neuronal physiological properties</i> .....                                                    | 32        |
| 3.3. <i>Degeneracy in calcium regulation and in the induction of synaptic plasticity</i> .....                       | 38        |
| 3.4. <i>Degeneracy in signaling cascades that regulate synaptic plasticity</i> .....                                 | 42        |
| 3.5. <i>Degeneracy in the expression of synaptic plasticity</i> .....                                                | 44        |
| 3.6. <i>Degeneracy in the induction and expression of non-synaptic plasticity</i> .....                              | 46        |
| 3.7. <i>Degeneracy in metaplasticity and in maintaining stability of learning</i> .....                              | 51        |
| 3.8. <i>Degeneracy in the generation and regulation of local field potentials</i> .....                              | 54        |
| 3.9. <i>Degeneracy in neural coding</i> .....                                                                        | 56        |
| 3.10. <i>Degeneracy in learning and memory</i> .....                                                                 | 60        |
| <b>4. The causality conundrum .....</b>                                                                              | <b>63</b> |
| 4.1. <i>Inevitable flaws in an experimental plan to establish causality that leaps across multiple scales.</i> ..... | 63        |
| 4.2. <i>Degeneracy: The way forward</i> .....                                                                        | 67        |
| <b>5. Conclusions.....</b>                                                                                           | <b>70</b> |
| <b>ACKNOWLEDGMENTS.....</b>                                                                                          | <b>72</b> |
| <b>REFERENCES .....</b>                                                                                              | <b>73</b> |

## 1 **1. Introduction**

2 The pervasive question on the relationship between structure and function spans every aspect of  
3 life, science and philosophy: from building architectures to the mind-body problem, from  
4 connectomics to genomics to proteomics, from subatomic structures to cosmic bodies and from  
5 biomechanics to climate science. Even within a limited perspective spanning only neuroscience,  
6 the question has been posed at every scale of brain organization spanning the genetic to  
7 behavioral ends of the spectrum. Efforts to address this question have resulted in extensive  
8 studies that have yielded insights about the critical roles of protein structure and localization,  
9 synaptic ultrastructure, dendritic morphology, microcircuit organization and large-scale synaptic  
10 connectivity in several neural and behavioral functions.

11 The question on the relationship between structure and function has spawned wide-  
12 ranging debates, with disparate approaches towards potential answers. At one extreme is the  
13 suggestion that structure defines function (Buzsaki, 2006):

14 “The safest way to start speculating about the functions of a structure is to inspect  
15 its anatomical organization carefully. The dictum “structure defines function” never  
16 fails, although the architecture in itself is hardly ever sufficient to provide all the  
17 necessary clues.”

18  
19 Within this framework, the following is considered as a route for understanding neural systems  
20 and behavior (Buzsaki, 2006):

21 “First, we need to know the basic “design” of its circuitry at both microscopic and  
22 macroscopic levels. Second, we must decipher the rules governing interactions  
23 among neurons and neuronal systems that give rise to overt and covert behaviors.”

24  
25 The other extreme is the assertion that “form follows function”, elucidated by Bert Sakmann  
26 (Sakmann, 2017), quoting Louis Sullivan:

27           “Whether it be the sweeping eagle in his flight, or the open apple-blossom, the  
28           toiling work-horse, the blithe swan, the branching oak, the winding stream at its  
29           base, the drifting clouds, over all the coursing sun, form ever follows function, and  
30           this is the law. Where function does not change, form does not change”.

31  
32       Within this framework, the approach to understanding neural structure function relations was  
33       elucidated as (Sakmann, 2017):

34           "The approach we took, in order to discover structure-function relations that help to  
35           unravel simple design principles of cortical networks was, to first determine  
36           functions and then reconstruct the underlying morphology assuming that “form  
37           follows function”, a dictum of Louis Sullivan and also a Bauhaus design principle.”

38  
39       A third approach embarks on addressing the structure-function question by recognizing the  
40       existence of ubiquitous variability and combinatorial complexity in biological systems. This was  
41       elucidated in a landmark review by Edelman and Gally, who presented an approach to structure-  
42       function relationship by defining degeneracy (Edelman and Gally, 2001):

43           "Degeneracy is the ability of elements that are structurally different to perform the  
44           same function or yield the same output. Unlike redundancy, which occurs when the  
45           same function is performed by identical elements, degeneracy, which involves  
46           structurally different elements, may yield the same or different functions depending  
47           on the context in which it is expressed. It is a prominent property of gene networks,  
48           neural networks, and evolution itself. Indeed, there is mounting evidence that  
49           degeneracy is a ubiquitous property of biological systems at all levels of  
50           organization.”

51  
52       They approach degeneracy and the structure-function question from an evolutionary perspective,  
53       noting (Edelman and Gally, 2001):

54           "Here, we point out that degeneracy is a ubiquitous biological property and argue  
55           that it is a feature of complexity at genetic, cellular, system, and population levels.  
56           Furthermore, it is both necessary for, and an inevitable outcome of, natural  
57           selection.”

58  
59       From this perspective, the supposition that a one-to-one relationship between structure and  
60       function exists is eliminated, thereby yielding more structural routes to achieving the same  
61       function. This perspective posits that biological complexity should be viewed from the

62 evolutionarily advantageous perspective of providing functional robustness through degeneracy.  
63 Further, the degeneracy framework provides the system with higher degrees of freedom to recruit  
64 a state-dependent solution from a large repertoire of routes that are available to achieve the same  
65 function.

66         The advantages of biological variability (Foster *et al.*, 1993; Gjorgjieva *et al.*, 2016;  
67 Goldman *et al.*, 2001; Katz, 2016; Marder, 2011; Marder and Goaillard, 2006; Marder *et al.*,  
68 2015; Marder and Taylor, 2011; O'Leary and Marder, 2014; Prinz *et al.*, 2004; Taylor *et al.*,  
69 2009), degeneracy (Drion *et al.*, 2015; Edelman and Gally, 2001; Leonardo, 2005; O'Leary *et al.*,  
70 2013; Whitacre and Bender, 2010; Whitacre, 2010) and complexity (Carlson and Doyle, 2002;  
71 Edelman and Gally, 2001; Stelling *et al.*, 2004; Tononi *et al.*, 1996, 1999; Weng *et al.*, 1999;  
72 Whitacre, 2010), especially in terms of their roles in achieving robust function, have been widely  
73 studied and recognized in several biological process, including those in simple nervous systems.  
74 However, this recognition has been very limited in the mammalian neuroscience literature, where  
75 the focus is predominantly on explicitly assigning (or implicitly assuming) unique causal  
76 mechanistic relationships between constituent components and emergent functions. Here, we  
77 focus on the mammalian hippocampus, a brain region that has been implicated in spatial  
78 cognition, learning and memory, and review several lines of evidence that point to the existence  
79 of degeneracy in hippocampal physiology and plasticity. We argue that the elucidation of  
80 degeneracy spanning multiple scales could result in resolution of several existing controversies  
81 in the field, and provide an ideal setup to design experiments to understand neuronal systems,  
82 their adaptability and their responses to pathological insults.

83         The rest of the review is organized into four sections. In the first of these sections, we  
84 explore the foundations of degeneracy, especially from a perspective of an encoding system such

85 as the hippocampus, and outline distinctions between different forms of homeostasis and their  
86 interactions with encoding-induced adaptations. In the second section, we build an argument that  
87 theoretical and experimental literature, spanning multiple scales of analysis, presents abundant  
88 support for the prevalence of degeneracy in almost all aspects of hippocampal physiology and  
89 plasticity. The third section explores the important question on the feasibility of establishing one-  
90 to-one structure-function relationships in systems that exhibit degeneracy through complexity.  
91 The final section concludes the review by briefly summarizing the arguments and postulates  
92 presented here on degeneracy in encoding within the degeneracy framework.

## 93 **2. Degeneracy: Foundations from the perspective of an encoding** 94 **system**

95  
96 Akin to the much broader span of physics from the subatomic to the cosmic scales, and very  
97 similar to studies on other biological systems, neural systems are studied at multiple scales of  
98 analysis (Fig. 1A). Although understanding neural systems *within* each of these scales of analysis  
99 is critical and has its own right for existence, a predominant proportion of neuro-scientific  
100 research is expended on *cross-scale emergence* of function through *interactions* among  
101 constituent components. One set of studies focus on the emergence of functions in a specified  
102 scale of analysis as a consequence of interactions among components in the immediately lower  
103 scale of analysis. An elegant example to such analysis is on the emergence of neuronal action  
104 potentials (a cellular scale function) as a consequence of interactions (Hodgkin and Huxley,  
105 1952) between sodium and delayed rectifier potassium channels (molecular scale components).  
106 Another set of studies focus on the relationships between function at a specified scale of analysis  
107 and components that are integral to a scale that is several levels apart. With specific reference to  
108 the hippocampus, assessing the molecular- or cellular-scale components (*e.g.*, receptors,



109 synapses) that are *causally* responsible for learning and memory (a behavioral scale function that  
110 is several scales apart from the molecular/cellular scales) forms an ideal example for studies that  
111 belong in this category (Bliss and Collingridge, 1993; Kandel *et al.*, 2014; Martin *et al.*, 2000;  
112 Mayford *et al.*, 2012; Neves *et al.*, 2008a).

113         Healthy and invigorating debates related to the philosophical and the scientific basis of  
114 such analyses, with themes ranging from broad discussions on reductionism vs. holism (Bennett  
115 and Hacker, 2003; Bickle, 2015; Jazayeri and Afraz, 2017; Krakauer *et al.*, 2017; Panzeri *et al.*,  
116 2017) to more focused debates on the specific cellular components that are involved in specific  
117 aspects of coding and behavior (Bliss and Collingridge, 1993; Gallistel, 2017; Kandel *et al.*,  
118 2014; Kim and Linden, 2007; Martin *et al.*, 2000; Mayford *et al.*, 2012; Mozzachiodi and Byrne,  
119 2010; Neves *et al.*, 2008a; Otchy *et al.*, 2015; Tittley *et al.*, 2017; Zhang and Linden, 2003), have  
120 contributed to our emerging understanding of neural systems and their links to behavior. Several  
121 studies have covered the breadth and depth of these debates (Bargmann and Marder, 2013;  
122 Bennett and Hacker, 2003; Bickle, 2015; Jazayeri and Afraz, 2017; Jonas and Kording, 2017;  
123 Kandel *et al.*, 2014; Katz, 2016; Kim and Linden, 2007; Krakauer *et al.*, 2017; Lazebnik, 2002;  
124 Marder, 1998, 2011, 2012; Marder *et al.*, 2014; Marder and Thirumalai, 2002; Mayford *et al.*,  
125 2012; Panzeri *et al.*, 2017; Tytell *et al.*, 2011), and will not be the focus of this review.

126         Within the purview of degeneracy, the emergence of specific combinations of higher-  
127 scale functions (within the limits of biological variability) could be achieved (Fig. 1B) through  
128 interactions among disparate parametric combinations in a lower scale (Edelman and Gally,  
129 2001; Foster *et al.*, 1993; Gjorgjieva *et al.*, 2016; Goldman *et al.*, 2001; Marder, 2011; Marder  
130 and Goillard, 2006; Marder *et al.*, 2015; Marder and Taylor, 2011; O'Leary and Marder, 2014;  
131 Prinz *et al.*, 2004; Rathour and Narayanan, 2012a, 2014; Srikanth and Narayanan, 2015; Stelling

132 *et al.*, 2004; Taylor *et al.*, 2009). A straightforward corollary to this is that robust homeostasis in  
133 the maintenance of specific combinations of higher-scale functions in the face of perturbations  
134 there would be achieved through very different routes involving disparate parametric  
135 combinations in a lower scale (Fig. 1C). For instance, a change in neuronal firing rate at the  
136 cellular scale owing to external perturbations involving pathological insults or behavioral  
137 experience could be compensated for by different sets of changes to synaptic or intrinsic  
138 parameters (at the molecular scale) to achieve activity homeostasis (Gjorgjieva *et al.*, 2016;  
139 Hengen *et al.*, 2016; Nelson and Turrigiano, 2008; Turrigiano, 2011; Turrigiano, 1999, 2008;  
140 Turrigiano and Nelson, 2004). Thus, under the degeneracy framework, different uncorrelated  
141 clusters in the lower-scale parametric space could result in similar, if not identical, functional  
142 outcomes in the higher-scale measurement space, thereby suggesting a many-to-one relationship  
143 between the lower-scale parameters and higher-scale measurements (Edelman and Gally, 2001;  
144 Jazayeri and Afraz, 2017; Krakauer *et al.*, 2017). Prominent lines of experimental evidence in  
145 support of degeneracy in neural systems have come from demonstrations of remarkable animal-  
146 to-animal variability in constituent components in providing analogous functional outcomes,  
147 and/or from results on many-to-many mappings between neural activity and behavior (Marder,  
148 2011; Marder and Goaillard, 2006; Marder and Taylor, 2011; O'Leary and Marder, 2014; Schulz  
149 *et al.*, 2006; Schulz *et al.*, 2007; Vogelstein *et al.*, 2014).

150

## 151 **2.1. Degeneracy vs. compensation**

152 A common misconception relating to degeneracy is that systems exhibiting degeneracy should  
153 compensate for the removal of a specific lower-scale component by recruiting other structural  
154 components there to yield the same higher-scale function. A corollary to this misconception is

155 that an inability to compensate for the removal of a component is interpreted as evidence for the  
156 absence of degeneracy. For instance, consider an experiment where the “usefulness” of a specific  
157 gene is being tested by assessing deficits in a specific behavior after knockout of the gene under  
158 consideration. If the knockout resulted in the behavioral deficit, degeneracy is determined to be  
159 absent and the gene considered essential. On the other hand, for the case where there was no  
160 behavioral deficit, the gene is either considered non-essential or the result is interpreted as the  
161 expression of degeneracy where other components have compensated for the knockout.

162         There have been several warnings against such oversimplified interpretations, especially  
163 considering that biological systems are dynamic adaptive systems and not static (Edelman and  
164 Gally, 2001; Grashow *et al.*, 2010; Marder, 2011; Marder and Goaillard, 2006; Marder and  
165 Taylor, 2011; O'Leary *et al.*, 2014; Taylor *et al.*, 2009; Wagner, 2005). Specifically, although the  
166 biological system adapts to the “unplanned” absence of the single gene (Edelman and Gally,  
167 2001), it is not always essential that the adaptations result in compensation of one specific  
168 behavioral readout (of the several possible readouts (Jazayeri and Afraz, 2017; Krakauer *et al.*,  
169 2017)). Any compensation has been argued as a statistical result of the tradeoffs that are inherent  
170 to this complex, adaptive and nonlinear system that manifests degeneracy that is *emergent* across  
171 multiple scales of organization (Edelman and Gally, 2001; O'Leary *et al.*, 2014). It has also been  
172 postulated that the compensatory process, and not the deletion, could have resulted in a specific  
173 deficit (O'Leary *et al.*, 2014), especially because of the remarkable dissociation between different  
174 forms of homeostasis (see Sec. 2.2).

175         Further, especially given the ubiquitous variability across animals in terms of constituent  
176 components that elicit analogous behavior, it is clear that the impact of deletion of one specific  
177 component would be differential. This implies that the simplistic generalizability on the presence

178 or absence of degeneracy based on a single parameter and a single measurement is untenable in  
179 complex adaptive systems. Additionally, with reference to the specific example of gene deletion,  
180 it is also important to distinguish between the acute impact of a lack of a protein that is tied to the  
181 gene and the developmental knockout (and associated compensatory mechanisms) of the  
182 specified gene (Edelman and Gally, 2001; Grashow *et al.*, 2010; Marder, 2011; Marder and  
183 Goaillard, 2006; Marder and Taylor, 2011; O'Leary *et al.*, 2014; Taylor *et al.*, 2009).

184 In addition to these strong arguments against a one-to-one link between compensation  
185 and degeneracy, it is also important to consider the specifics of the expectations on the specific  
186 function that degeneracy is defined for and what functional deficit is to be compensated. Let's  
187 consider the example of the emergence of membrane potential resonance in neurons as an  
188 example to illustrate this argument (Fig. 2). The emergence of resonance requires the expression  
189 of a resonating conductance, and the biophysical constraints on what makes a resonating  
190 conductance are well established (Cole, 1968; Das *et al.*, 2017; Hodgkin and Huxley, 1952;  
191 Hutcheon and Yarom, 2000; Mauro, 1961; Mauro *et al.*, 1970; Narayanan and Johnston, 2008).  
192 Hippocampal pyramidal neurons express several resonating conductances: the hyperpolarization-  
193 activated cyclic nucleotide-gated (HCN) nonspecific cation channels, the *M*-type potassium  
194 (KM) channels and the *T*-type calcium (CaT) channels, of which HCN and CaT channels exhibit  
195 overlapping voltage dependencies (Das *et al.*, 2017; Hu *et al.*, 2009; Hu *et al.*, 2002; Narayanan  
196 and Johnston, 2007, 2008; Pike *et al.*, 2000; Rathour and Narayanan, 2012a).

197 Let's first consider an example where the function on which degeneracy is assessed is  
198 qualitatively defined as the *expression* of membrane potential resonance (Fig. 2A). Whereas a  
199 passive neuron does not express resonance, the presence of the HCN and/or the CaT channels  
200 would result in the expression of resonance. This implies degeneracy in the function, where

201 similar functionality (in this case, the expression of resonance) is through disparate components  
202 (channel combinations). In this scenario, depending on the variable expression profiles of HCN,  
203 CaT and other modulating channels, removal of only one of them could still result in the  
204 expression of resonance in specific neurons (Das *et al.*, 2017; Rathour *et al.*, 2016; Rathour and  
205 Narayanan, 2012a, 2014). However, removal of both HCN and CaT channels would result in a  
206 deficit in the assessed function, where resonance ceases to express. In this scenario, the  
207 requirement or usefulness of HCN or CaT channels to the expression of resonance is easily  
208 discernable by acute blockade experiments, although it would be difficult to predict (a) synergy  
209 between different channels that are expressed towards the emergence of resonance with such  
210 one-channel-at-a-time pharmacological blockade experiments; and (b) possible compensatory  
211 mechanisms involving changes in kinetics or voltage-dependence properties of other channels,  
212 say KM channels, in a double knockout scenario (Marder, 2011; Marder and Goaillard, 2006;  
213 O'Leary *et al.*, 2014; Rathour and Narayanan, 2012a, 2014; Taylor *et al.*, 2009).

214 In most encoding or homeostatic scenarios involving changes in constituent components,  
215 however, the functional outcome that is expected is a more quantitative readout of, say, firing  
216 rate or calcium concentration altered or returned to *specific values*. Therefore, a widely  
217 employed alternate interpretation (Foster *et al.*, 1993; Goldman *et al.*, 2001; Marder, 2011;  
218 Marder and Goaillard, 2006; Marder *et al.*, 2015; Marder and Taylor, 2011; Prinz *et al.*, 2004;  
219 Rathour and Narayanan, 2012a, 2014; Srikanth and Narayanan, 2015; Taylor *et al.*, 2009) is  
220 where degeneracy is assessed as the ability of different structural components to elicit  
221 *quantitatively* similar functional measurements. With reference to our chosen example, this  
222 would translate to assessing degeneracy as the ability to achieve a *specific range of values* of  
223 resonance frequency with disparate combinations of parameters (Fig. 2B). If achieving a specific

224 range of resonance frequency was the functional goal, and not the qualitative expression of  
225 resonance, then the possibilities are numerous. A resonating conductance is indeed required for  
226 the expression of resonance (Fig. 2B), but the goal is not to understand the expression of  
227 resonance, but to maintain resonance frequency at a specific value. In the presence of a  
228 resonating conductance, this goal could be achieved through very different structural routes  
229 either by altering other channel conductances or by altering properties of the resonating  
230 conductance itself. This implies the expression of degeneracy, where disparate parametric  
231 combinations could yield *quantitatively* similar resonance frequencies (Rathour and Narayanan,  
232 2012a, 2014) across different models (Fig. 2C). Importantly, the order of degeneracy is rather  
233 large with the several active and passive properties, with the conductances, the voltage-  
234 dependence and kinetic properties of each of the several channels included. This also provides  
235 several routes to the emergence of compensation, where different channels and different  
236 parameters could differentially contribute to the emergence of similar functional measurements  
237 (Fig. 2C). We argue that this *quantitative* scenario with a large order of degeneracy is closer to  
238 the requirements of a system (at any given scale of organization) from the perspective of  
239 equilibrium and sustenance. The relevance of the qualitative scenario is rather limited to  
240 experiments that probe the expression of a specific phenomenon, which are “unplanned” from  
241 the evolutionary perspective there (Edelman and Gally, 2001).

242         Together, the question on the link between degeneracy and compensation should not be  
243 treated with simplistic ideas of linear interactions across components in a non-adapting system.  
244 The analyses should account for the specific definition of the function under consideration and  
245 the question on how degeneracy is defined. In addition, the nonlinear and synergistic interactions  
246 between different components that result in the specific function and animal-to-animal variability

247 in expression profiles of constituent components should be assessed as part of such analyses.  
248 Finally, the possibility that “stochastic” compensatory process could be homeostatic or  
249 pathological and importantly on whether the challenge that is being posed to the system by the  
250 experiment is “planned” from the perspective of evolutionary convergence should also be  
251 considered (Edelman and Gally, 2001; Grashow *et al.*, 2010; Marder, 2011; Marder and Taylor,  
252 2011; O’Leary *et al.*, 2014; Taylor *et al.*, 2009).

253

## 254 **2.2. Dissociation between different forms of homeostasis**

255 It is clear from the examples presented above that the specific functional readout for which  
256 robustness or homeostasis ought to be maintained is a very critical question within the  
257 framework of degeneracy. Although degeneracy can be defined or observed with reference to  
258 any function at any scale of organization, the answer to the question on what specific functional  
259 homeostasis is absolutely essential from an evolutionary/neuroethological perspective isn’t clear.  
260 Even with reference to individual neurons, the literature has defined several forms of  
261 homeostasis (Gjorgjieva *et al.*, 2016; Nelson and Turrigiano, 2008; Turrigiano, 2011; Turrigiano,  
262 2008; Turrigiano and Nelson, 2004), with popular measures involving neuronal firing rate  
263 (Hengen *et al.*, 2016), cytosolic calcium (Honnuraiah and Narayanan, 2013; O’Leary *et al.*, 2014;  
264 Siegel *et al.*, 1994; Srikanth and Narayanan, 2015) or excitation-inhibition balance (Yizhar *et al.*,  
265 2011). In addition, despite perpetual changes in afferent activity under *in vivo* conditions  
266 (Buzsaki, 2002, 2006, 2015; Srikanth and Narayanan, 2015; Tononi and Cirelli, 2006), specific  
267 neuronal subtypes maintain distinct functional signatures, say in terms of their excitability or  
268 oscillatory or frequency selectivity measurements, that are different from other neuronal  
269 subtypes even in the same brain region (Hoffman *et al.*, 1997; Migliore and Shepherd, 2002,

270 2005; Narayanan and Johnston, 2007, 2008; Pike *et al.*, 2000; Spruston, 2008; Zemankovics *et*  
271 *al.*, 2010). Further, synaptic properties such as strength and release probabilities are also very  
272 discernable across different synaptic subtypes (say excitatory *vs.* inhibitory) even on the same  
273 postsynaptic neuron (Andrasfalvy and Magee, 2001; Andrasfalvy and Mody, 2006; Dittman *et*  
274 *al.*, 2000; Koester and Johnston, 2005; Magee and Cook, 2000; Smith *et al.*, 2003). This  
275 suggests the existence of some form of homeostasis that maintains these intrinsic and synaptic  
276 measurements, including or apart from firing rate or calcium homeostasis or excitatory-inhibitory  
277 balance, despite behaviorally driven encoding changes or perpetual activity switches that are  
278 common in the hippocampus and other regions of the brain. Does maintenance of one of them  
279 translate to maintenance of all of them? If not, which of these different forms of homeostasis are  
280 absolutely essential for the animal from the evolutionary/neuroethological perspective?

281         There are several lines of clear evidence that there are remarkable dissociations between  
282 different forms of homeostasis (Srikanth and Narayanan, 2015). First, cellular- or network-scale  
283 functions could robustly emerge with disparate combinations of molecular- or cellular-scale  
284 parameters (Foster *et al.*, 1993; Marder, 2011; Marder and Goaillard, 2006; Prinz *et al.*, 2004;  
285 Rathour and Narayanan, 2014; Taylor *et al.*, 2009). These observations suggest that precise  
286 homeostatic balance at a lower scale (*e.g.*, ion channels expressed to exact conductance values)  
287 is not essential for maintaining functional homeostasis at a higher scale. Second, even in the  
288 same set of neurons/networks/animals, different measurements have different dependencies on  
289 underlying parameters, and these dependencies could be variable. For instance, in the same  
290 neuron, resonance frequency could have a larger dependence on one channel subtype with input  
291 resistance being critically regulated by another channel, with the specifics of these dependencies  
292 variable across different neurons of the same subtype (Fig. 3A). Studies have shown that  
293 different channels could have differential and variable impact on disparate measurements from  
294 the same neuron, even in a location dependent manner (Grashow *et al.*, 2010; O'Leary *et al.*,



295 2014; Rathour and Narayanan, 2014; Taylor *et al.*, 2009). Additionally, acute blockade of one  
296 specific channel results in weakly correlated changes in different measurements in the same  
297 neuron (Rathour *et al.*, 2016). This implies that changing individual constitutive components to  
298 maintain robust homeostasis in one of the measurements does not necessarily translate to robust  
299 homeostasis in all the other measurements.

300 Third, for maintenance of calcium homeostasis across neurons in a network or in neurons  
301 that are subjected to perpetual switches in afferent activity, it is not essential that functional  
302 homeostasis across different intrinsic or synaptic measurements is maintained. Specifically,  
303 owing to inherent variability in different constitutive components, the channel conductance  
304 values or neuronal intrinsic properties or synaptic strengths could be very different across  
305 different neurons despite maintenance of precise calcium homeostasis in neurons or their  
306 network (Gjorgjieva *et al.*, 2016; O'Leary *et al.*, 2014; Srikanth and Narayanan, 2015). Finally,  
307 calcium and firing rate homeostasis have been shown to be dissociated whereby tremendous  
308 variability in channel conductance values, firing rate and pattern of firing have been observed  
309 despite efficacious maintenance of calcium homeostasis (O'Leary *et al.*, 2013; O'Leary *et al.*,  
310 2014; Srikanth and Narayanan, 2015). Together, these studies establish that none of the  
311 individual forms of homeostasis (in calcium concentration or in channel densities channel or in  
312 intrinsic functional characteristics including neuronal firing-rate) necessarily translate to or  
313 follow from any other among them (O'Leary *et al.*, 2013; O'Leary *et al.*, 2014; Rathour and  
314 Narayanan, 2012a, 2014; Srikanth and Narayanan, 2015), implying clear dissociations between  
315 different forms of homeostasis.

### 316 **2.3. Baseline vs. plasticity profile homeostasis**

317 An important and necessary cytosure in the physiology of encoding systems is their ability to  
318 change in a manner that promotes adaptability to the environment. In other words, the ability to  
319 undergo plasticity is an important requirement for it to encode or learn newly available

320 information from the environment. Such plasticity has been shown to be ubiquitous, spanning  
321 cellular and network structures across almost all regions, and could be triggered by development  
322 (Desai *et al.*, 2002; Desai *et al.*, 1999; Luo and Flanagan, 2007; Schreiner and Winer, 2007;  
323 Turrigiano and Nelson, 2004; White and Fitzpatrick, 2007), by learning processes (Kandel, 2001;  
324 Kandel *et al.*, 2014; Kim and Linden, 2007; Lamprecht and LeDoux, 2004; Narayanan and  
325 Johnston, 2012; Tittley *et al.*, 2017; Zhang and Linden, 2003) or by pathological insults (Beck  
326 and Yaari, 2008; Bernard *et al.*, 2007; Brager and Johnston, 2014; Grant, 2012; Johnston *et al.*,  
327 2016; Kullmann, 2002; Lee and Jan, 2012; Lehmann-Horn and Jurkat-Rott, 1999; Lerche *et al.*,  
328 2013; Poolos and Johnston, 2012). A traditional method to study such plasticity mechanisms is to  
329 subject neuronal or synaptic structures to specific activity patterns towards understanding the  
330 rules for plasticity in specific components. Assessed through such protocols, distinct synapses  
331 show signature profiles of plasticity in terms of the strength and direction of synaptic plasticity  
332 elicited by specific activity patterns. Additionally, there are also specific sets of non-synaptic  
333 forms of plasticity (in channel densities and properties, for instance) that are concomitant to the  
334 synaptic plasticity induced by different activity patterns (Abbott and Nelson, 2000; Abbott and  
335 Regehr, 2004; Bi and Poo, 1998; Bliss and Collingridge, 1993; Bliss and Lomo, 1973; Chung *et*  
336 *al.*, 2009a; Chung *et al.*, 2009b; Cooper and Bear, 2012; Dittman *et al.*, 2000; Dudek and Bear,  
337 1992; Fortune and Rose, 2001; Frick *et al.*, 2004; Jorntell and Hansel, 2006; Lin *et al.*, 2008;  
338 Losonczy *et al.*, 2008; Lujan *et al.*, 2009; Magee and Johnston, 1997; Markram *et al.*, 1997;  
339 Narayanan and Johnston, 2007, 2008; Shah *et al.*, 2010; Sjostrom *et al.*, 2008). This implies  
340 *plasticity profile homeostasis* (Anirudhan and Narayanan, 2015; Mukunda and Narayanan,  
341 2017), where synapses of the same subtype respond similarly to analogous afferent activity,  
342 thereby resulting in a subtype-dependent rule for synaptic plasticity (Larsen and Sjostrom, 2015).

343 In terms of non-synaptic plasticity, such plasticity profile homeostasis could be generalized to  
344 subtypes of cells manifesting specific forms of neuronal plasticity (in intrinsic properties, for  
345 instance).

346 Juxtaposed against the considerable variability in different constitutive components  
347 across neurons of the same subtype, and given the critical dissociations between different forms  
348 of homeostasis (Sec. 2.2), it is easy to deduce that the maintenance of baseline homeostasis of a  
349 given measurement (say activity or calcium) does not necessarily imply that the system will  
350 respond in a similar manner to identical perturbations (Fig. 3B). As the direction and strength of  
351 change in activity or calcium is a critical determinant of the plasticity profile (Lisman, 1989;  
352 Lisman *et al.*, 2002; Lisman *et al.*, 2012; Lisman, 2001; Nevian and Sakmann, 2006; Regehr,  
353 2012; Shouval *et al.*, 2002; Sjostrom and Nelson, 2002; Sjostrom *et al.*, 2008; Zucker, 1999;  
354 Zucker and Regehr, 2002), variable responses to incoming perturbations (physiological or  
355 pathophysiological) would translate to very distinct plasticity profiles even in synapses of the  
356 same subtype (Anirudhan and Narayanan, 2015; Mukunda and Narayanan, 2017; O'Leary *et al.*,  
357 2013; Srikanth and Narayanan, 2015). Therefore, from the perspective of homeostasis in  
358 encoding systems such as the hippocampus, it is not just sufficient to ask if baseline homeostasis  
359 of a given measurement is maintained. It is also important to ask if the response of the system to  
360 identical perturbations is similar to enable plasticity profile homeostasis. The absence of such  
361 plasticity profile homeostasis would result in very different adaptations to identical perturbations  
362 even under baseline conditions, resulting in the absence of signature plasticity profiles being  
363 associated with specific neurons and synapses. Although there is dissociation between the  
364 maintenance of baseline *vs.* plasticity profile homeostasis, studies have demonstrated degeneracy  
365 in the maintenance of short- and long-term plasticity profiles. Specifically, these studies have

366 shown that disparate combinations of ion channel conductances and calcium-handling  
367 mechanisms could yield analogous short- or long-term plasticity profiles (Anirudhan and  
368 Narayanan, 2015; Mukunda and Narayanan, 2017). Although we dealt with plasticity profile  
369 homeostasis and its dissociation from baseline homeostasis, a related phenomenon that involves  
370 plasticity of *plasticity profiles* has been defined as metaplasticity (Abraham, 2008; Abraham and  
371 Bear, 1996; Abraham and Tate, 1997; Cooper and Bear, 2012; Hulme *et al.*, 2013; Sehgal *et al.*,  
372 2013). Lines of evidence supporting degeneracy in hippocampal metaplasticity and its roles in  
373 stable learning will be explored in Sec. 3.3.

374

#### 375 **2.4. Encoding and homeostasis within the degeneracy framework**

376 The function of learning systems extends beyond simple maintenance of physiological or  
377 plasticity homeostasis. The functional goal in these systems is rather contrary to *maintenance* of  
378 homeostasis, because encoding or learning of new information demands *alteration* in  
379 physiology/behavior through continual *adaptation* in an experience-/activity-dependent manner.  
380 This presents a paradoxical requirement where components ought to *change* to encode new  
381 information, *without* perturbing the overall homeostatic balance of the system. Thus, encoding of  
382 a new experience entails a tricky balance between change and homeostasis (James, 1890):

383       “Plasticity, then, in the wide sense of the word, means the possession of a structure  
384       weak enough to yield to an influence, but strong enough not to yield all at once.  
385       Each relatively stable phase of equilibrium in such a structure is marked by what  
386       we may call a new set of habits.”

387

388 From the degeneracy and physiology perspectives, this balance poses several tricky questions  
389 that the literature does not present definitive answers to. For instance, could learning systems  
390 accomplish this balance between encoding of new information *and* maintenance of homeostasis  
391 *within* the framework of degeneracy? In other words, could the plasticity mechanisms that define

392 encoding *and* the homeostatic mechanisms that negate the impact of perturbation *together* be  
393 realized through disparate combinations of constitutive components (Narayanan and Johnston,  
394 2012; Nelson and Turrigiano, 2008; Turrigiano, 2007, 2011; Turrigiano *et al.*, 1994; Turrigiano,  
395 1999; Turrigiano and Nelson, 2000)? Would the availability of more routes to achieve encoding  
396 or homeostasis be detrimental or be advantageous towards accomplishing these goals together?  
397 Would the dissociations between different forms of homeostasis (Sec. 2.2) and between baseline  
398 *vs.* plasticity profile homeostasis (Sec. 2.3) translate to severe constraints on accomplishing this  
399 balance *within* the framework of degeneracy?

400       Together, there are lines of evidence supporting the formulation that plasticity and  
401 homeostasis individually could be achieved through several non-unique routes through disparate  
402 combinations of constituent components (Anirudhan and Narayanan, 2015; Mukunda and  
403 Narayanan, 2017; Narayanan and Johnston, 2012; Nelson and Turrigiano, 2008; O'Leary *et al.*,  
404 2013; Srikanth and Narayanan, 2015; Turrigiano, 2007, 2011; Turrigiano *et al.*, 1994;  
405 Turrigiano, 1999; Turrigiano and Nelson, 2000). However, the focus on achieving the *conjoined*  
406 goals of effectuating changes in response to new information *and* maintaining robust  
407 homeostasis in the face of such changes *within* the framework of degeneracy have been  
408 conspicuously lacking. Such focus is especially important because of the seemingly  
409 contradictory requirements of the two processes, where one necessitates change and the other  
410 works to negate any change, resulting in the possibility where there could be detrimental cross-  
411 interference working towards negating each other. Therefore, for the framework of degeneracy to  
412 be relevant in learning systems, it is important that future studies assess the twin goals of  
413 encoding and homeostasis to be synergistically conjoined rather than treat them as isolated  
414 processes that independently achieve their respective goals. Without the recognition of such

415 synergy between encoding and homeostatic systems, assessing the ability of these two processes  
416 to avoid cross-interference becomes intractable.

417

## 418 **2.5. Curse-of-dimensionality or evolutionary robustness**

419 Curse of dimensionality, coined by Bellman (Bellman, 1957), refers to the extreme difficulties  
420 encountered with the comprehension or solution to a problem that involves exorbitantly large  
421 numbers of input variables, their attributes and possible solutions. In biology in general, and in  
422 neuroscience in particular, the dimensions of the parametric space is typically large, making  
423 dimensions of the interactional space (the space that covers all forms of interactions spanning all  
424 these parameters) even larger. The variability of parametric values even in systems exhibiting  
425 similar functions and the perpetual adaptation of these parameters in response to external  
426 perturbations (or even baseline turnover towards maintaining homeostasis) make it impossible to  
427 localize any biological function to a small subspace of this large interactional space. This, as a  
428 consequence of the curse of dimensionality, translates to mathematical and computational  
429 intractability of biological systems because of insufficiency of collected data towards providing  
430 an accurate answer to questions related to comprehending or assessing the system.

431 The framework of degeneracy on the other hand suggests that biological systems thrive  
432 on this parametric and interactional complexity because it provides the ideal substrate for  
433 arriving at disparate structural routes to robust functional similarity. Several strong qualitative  
434 and quantitative arguments, based on several lines of evidence spanning different scales of  
435 analysis across different biological systems, have been placed in favor of synergistic links  
436 between degeneracy, complexity, robustness, evolvability and adaptation. Therefore, the  
437 dimensionality of the parametric and interactional space of biological systems should not be

438 treated as a curse in terms of our inability to analytically track or comprehend the system, but as  
439 a fundamental and necessary feature towards achieving the contradictory yet conjoint goals (Sec.  
440 2.4) of functional robustness (Edelman and Gally, 2001; Kitano, 2007; Marder, 2011; Marder  
441 and Goillard, 2006; Rathour *et al.*, 2016; Rathour and Narayanan, 2012a, 2014; Sporns *et al.*,  
442 2000; Stelling *et al.*, 2004; Tononi and Cirelli, 2006; Tononi and Edelman, 1998; Tononi *et al.*,  
443 1998; Wagner, 2005, 2008), evolvability (Edelman and Gally, 2001; Wagner, 2008; Whitacre  
444 and Bender, 2010; Whitacre, 2010) and adaptation (Albantakis *et al.*, 2014; Anirudhan and  
445 Narayanan, 2015; Joshi *et al.*, 2013; Mukunda and Narayanan, 2017).

446       Importantly, the recognition of the critical links between complexity, degeneracy and  
447 adaptability allows for better design of experimental and analysis techniques for assessing  
448 biological systems and their function. Not only do these techniques alleviate the pains of hand  
449 tuning in computational models (Prinz *et al.*, 2003), but also recognize the implications for  
450 parametric variability to robust functions and the fallacies associated with misinterpretation of  
451 results from knockout animals in the face of perpetual biological compensation (Edelman and  
452 Gally, 2001; Grashow *et al.*, 2010; Marder, 2011; Marder and Goillard, 2006; Marder and  
453 Taylor, 2011; O'Leary *et al.*, 2014; Taylor *et al.*, 2009; Wagner, 2005). Some classes of  
454 techniques developed with the recognition of the strong links between variability, complexity,  
455 adaptability, degeneracy and robustness are: (a) the global sensitivity analysis technique (Sec.  
456 3.2) that employs a stochastic search algorithm spanning a large parametric space and optimizes  
457 for *multiple* physiological objectives (Foster *et al.*, 1993; Goldman *et al.*, 2001; Marder, 2011;  
458 Marder and Goillard, 2006; Marder and Taylor, 2011; Prinz *et al.*, 2004; Rathour and  
459 Narayanan, 2014); (b) the theoretical and experimental assessment of the links between  
460 quantitative complexity measures and robustness with reference to several physiological and

461 pathophysiological attributes (Albantakis *et al.*, 2014; Edelman and Gally, 2001; Joshi *et al.*,  
462 2013; Kitano, 2007; Sarasso *et al.*, 2015; Sporns *et al.*, 2000; Stelling *et al.*, 2004; Tononi and  
463 Edelman, 1998; Tononi *et al.*, 1998; Tononi *et al.*, 1996, 1999; Wagner, 2005, 2008; Whitacre  
464 and Bender, 2010; Whitacre, 2010); and (c) plasticity models that have accounted for  
465 concomitant changes in multiple components (Secs. 3.6–3.7) rather than focusing on a one-to-  
466 one relationship between functional plasticity and one specific component that undergoes  
467 changes (Abbott and LeMasson, 1993; Anirudhan and Narayanan, 2015; LeMasson *et al.*, 1993;  
468 Mukunda and Narayanan, 2017; O'Leary *et al.*, 2013; O'Leary *et al.*, 2014; Siegel *et al.*, 1994;  
469 Srikanth and Narayanan, 2015). These analyses have made it abundantly clear that the  
470 complexities inherent to biological systems should be considered as substrates for functional  
471 robustness through degeneracy (Edelman and Gally, 2001), rather than be viewed from the  
472 curse-of-dimensionality perspective.

473

## 474 **2.6. Error correction mechanisms**

475 A critical requirement in a system that is endowed with degeneracy is an error-correcting  
476 feedback mechanism that regulates constituent components in an effort to achieve a specific  
477 function. For instance, consider the example where the goal is to achieve calcium homeostasis in  
478 a neuron. In this scenario, as the specific regulatory mechanism that is to be triggered is  
479 dependent on the current state of the neuron, or more precisely the current levels of calcium, it is  
480 important that the regulatory mechanism is geared towards *correcting* the *error* between the  
481 target function and the current state (Abbott and LeMasson, 1993; LeMasson *et al.*, 1993;  
482 O'Leary *et al.*, 2013; O'Leary *et al.*, 2014; Siegel *et al.*, 1994; Srikanth and Narayanan, 2015).  
483 This requires a closed circuit feedback loop that initiates a compensatory mechanism that is



484 driven by the quantitative distance between the target function and the current state. This state-  
485 dependent perpetual error correction becomes especially important in a scenario where distinct  
486 regulatory mechanisms govern the different constitute components. With the specific example at  
487 hand, let's say the error correcting feedback mechanism regulates ion channel conductances by  
488 altering their protein expression through several transcription factors (Srikanth and Narayanan,  
489 2015). In such a scenario, calcium homeostasis could be achieved by recruiting several non-  
490 unique sets of these transcription factors. As each of these transcription factors could be coupled  
491 to the regulation of distinct combinations of ion channels, calcium homeostasis could be  
492 achieved through several non-unique combinations of ion channels.

493         Within the degeneracy framework, although distinct solutions are possible with weak  
494 pairwise correlations between constitutive components, there is a strong synergistic *collective*  
495 dependence of these components to achieve a function (Rathour and Narayanan, 2014).  
496 Specifically, let's consider two neurons (neurons 1 and 2) with distinct sets of non-unique  
497 parametric combinations that yielded very similar function. However, given the nonlinearities of  
498 neural systems, it would be infeasible to expect similar function from a third neuron built with  
499 one-half of the parameters taken from neuron 1 and the other half taken from neuron 2. This  
500 collective cross-dependence is an essential component of systems manifesting degeneracy and  
501 should be respected by mechanisms that regulate the constitutive components. Returning to  
502 specific example under consideration, the specific *ensemble* of the targeted transcription factors  
503 and channel conductances are important in terms of which solution is *chosen* within the  
504 degeneracy framework. This places strong requirements on the distinct regulatory mechanisms,  
505 transcription factors in this case, that they strongly interact with each other rather than acting

506 independent of each other (Srikanth and Narayanan, 2015) in a manner that is *driven* by the error  
507 that is being fed back in a state-dependent temporally precise manner.

508         These requirements become especially important in an encoding system such as the  
509 hippocampus, whose afferent activity is perpetually variable in a behavioral state-dependent  
510 manner, requiring temporally proximal feedback for the continuous maintenance of robust  
511 function. A simple solution to account for cross-interacting regulatory mechanisms is to assume  
512 the existence of only one regulatory mechanism that governs all constitutive components (*e.g.*,  
513 one transcription factors controls all channels and receptors on a neuron (O'Leary *et al.*, 2014)).  
514 However, this might not always be valid or possible or feasible (Srikanth and Narayanan, 2015),  
515 especially if the complexity of system is enormous (*e.g.*, coexistence of multiple transcription  
516 factors in the hippocampus (Alberini, 2009; Bading *et al.*, 1993; Dolmetsch, 2003; Lein *et al.*,  
517 2007). In these scenarios, it is important that the error-sensing and regulatory mechanisms also  
518 exhibit degeneracy and are strongly inter-coupled to each other through cross-regulatory  
519 mechanisms at that scale as well (*e.g.*, multiple calcium sensors accompanied by a network of  
520 transcription factors coupled through feedback loops that regulate each other (Cheong *et al.*,  
521 2011; Kotaleski and Blackwell, 2010; Losick and Desplan, 2008; Thattai and van Oudenaarden,  
522 2001; Yu *et al.*, 2008)). In summary, the ability to achieve functional robustness through  
523 degeneracy in any scale of analysis requires continuous correction of functional deficits, without  
524 which it is impossible to adjudge the efficacious accomplishment of a desired goal through a  
525 chosen route (which is one among the many possible routes). In a system with enormous  
526 complexity, this is typically achieved through an error-correcting feedback pathway that recruits  
527 multiple cross-interacting regulatory mechanisms towards maintaining collective cross-

528 dependence of constituent mechanisms (Rathour and Narayanan, 2014; Srikanth and Narayanan,  
529 2015).

### 530 **3. Degeneracy at multiple scales in the hippocampus**

531 The hippocampus is a brain region that has been shown to be critically involved in spatial  
532 representation of the external environment and in several forms of learning and memory  
533 (Anderson *et al.*, 2007; Eichenbaum, 2012; Hartley *et al.*, 2014; Moser *et al.*, 2008; Neves *et al.*,  
534 2008a; Scoville and Milner, 1957). As a region that is involved in encoding of new information  
535 and one that is part of the medial temporal lobe that is critically sensitive to excitotoxic insults  
536 (Bernard *et al.*, 2007; Dam, 1980; de Lanerolle *et al.*, 1989; Johnston *et al.*, 2016; Sloviter,  
537 1991), it is important that the hippocampal cells maintain some form of activity homeostasis to  
538 avoid runaway excitation.

539 The hippocampus consists of several subtypes of neurons and glia receiving afferent  
540 information from tens of thousands of synapses and expressing distinct sets of a wide variety of  
541 ligand-gated receptors and voltage-gated ion channels, each built through complex structural  
542 interactions between a number of main and auxiliary subunits (Lai and Jan, 2006; Migliore and  
543 Shepherd, 2002; Nusser, 2009, 2012; Vacher *et al.*, 2008; Verkhratsky and Steinhauser, 2000).  
544 The regulatory role of glial cells and their constitutive components in synaptic information  
545 processing is well established (Allen and Barres, 2005, 2009; Araque, 2008; Araque *et al.*, 2014;  
546 Araque *et al.*, 1999; Bazargani and Attwell, 2016; Deitmer *et al.*, 2006; Fields and Stevens-  
547 Graham, 2002; Halassa *et al.*, 2007; Halassa and Haydon, 2010; Haydon and Carmignoto, 2006;  
548 Pannasch and Rouach, 2013; Pascual *et al.*, 2005; Perea and Araque, 2005; Perea *et al.*, 2009),  
549 providing additional structural substrates that could participate in the encoding and homeostasis

550 processes. The basic properties and regulation of these and other membrane and cytoplasmic  
551 protein structures, in conjunction with intracellular (including the ER and the trafficking  
552 apparatus) and intercellular interaction dynamics (including neuronal synaptic connectivity and  
553 the glial syncytium) and morphological characteristics, regulates the intricate balance between  
554 encoding and homeostasis within the hippocampal structure. In addition to these, hippocampal  
555 structure and function are critically reliant on the afferent and efferent connectivity patterns, the  
556 metabolic pathways that drive and interact with the local cellular structures and the several forms  
557 of state-dependent modifications to each of these components. Together, the combinatorial  
558 complexity of the constitutive components that define hippocampal function is staggeringly  
559 astronomical.

560 A fundamental question that is of considerable interest to the research community is on  
561 how the hippocampus achieves robust function, especially in accomplishing the apparently  
562 contradictory goals of adaptive change and homeostasis (Sec. 2), in the face of such  
563 combinatorial complexity that drives its physiology and plasticity. Within the framework of  
564 degeneracy, it could be argued that the complexity is an enabler, and not an impediment, towards  
565 achieving functional robustness.

566 Does hippocampal physiology manifest degeneracy at multiple scales, whereby similar  
567 hippocampal function could be achieved through disparate structural combinations? In this  
568 section, we view hippocampal research spanning the past several decades through the lens of  
569 degeneracy and present clear qualitative and quantitative lines of evidence arguing for the  
570 ubiquitous presence of degeneracy spanning multiple scales of hippocampal function. We review  
571 lines of evidence showing multiple routes to achieving several critical hippocampal functions,  
572 which in some cases have been considered to be lines of evidence that are in apparent

573 contradiction to each other, triggering expansive debates and arguments within the field. In a  
574 manner similar to (Edelman and Gally, 2001), we systematically explore the expression of  
575 degeneracy at distinct scales (starting at the molecular scale and moving incrementally to the  
576 systems/behavioral scale) of hippocampal function (Fig. 1A), with function(s) or physiological  
577 measurements assessed within the specified scale of analysis. We postulate that the recognition  
578 of the ubiquitous prevalence of degeneracy would provide an evolutionarily routed framework to  
579 unify the several apparently contradictory routes to achieving the same function as necessity,  
580 rather than luxury, towards achieving physiological robustness.

581

### 582 **3.1. Degeneracy in the properties of channels and receptors**

583 Hippocampal neurons are endowed with myriad voltage and ligand dependent ion channels, with  
584 well-defined gradients in their expression profiles and their properties (Barnard *et al.*, 1998;  
585 Dingledine *et al.*, 1999; Johnston and Narayanan, 2008; Magee and Cook, 2000; Migliore and  
586 Shepherd, 2002; Narayanan and Johnston, 2012; Paoletti *et al.*, 2013; Sieghart and Sperk, 2002).  
587 The presence of these channels, with their signature characteristics and expression profiles, has  
588 been shown to play critical roles in the physiology (Das *et al.*, 2017; Johnston *et al.*, 1996;  
589 Johnston and Narayanan, 2008; Magee, 2000; Narayanan and Johnston, 2012), plasticity (Frick  
590 and Johnston, 2005; Johnston *et al.*, 2003; Remy *et al.*, 2010; Shah *et al.*, 2010; Sjostrom *et al.*,  
591 2008) and pathophysiology (Bernard *et al.*, 2007; Brager and Johnston, 2014; Johnston *et al.*,  
592 2016; Kullmann, 2002; Lee and Jan, 2012; Lerche *et al.*, 2013) of hippocampal neurons and their  
593 networks. Therefore, it is essential that the biophysical properties and expression profiles of  
594 these channels be tightly regulated to ensure functional robustness.

595           The regulation of targeting, localization and properties of these channels at specific  
596 levels, however, is a problem that involves several degrees of combinatorial freedom. The  
597 reasons behind this complexity are manifold. First, most of these channels are not protein  
598 molecules derived from single genes, but are assembled from several possible pore-forming and  
599 auxiliary subunits, expressed in different stoichiometry (Catterall, 1993, 1995; Gurnett and  
600 Campbell, 1996; Hille, 2001; Isom *et al.*, 1994). The presence or absence of a specific pore-  
601 forming or auxiliary subunit, and the specific ratios of their expression are important for  
602 trafficking, localization and properties of these channels. For instance, *A*-type K<sup>+</sup> channels in the  
603 hippocampus could be assembled by the main subunits from the Kv1 or Kv4 families and  
604 auxiliary subunits from the KChIP and DPP families (Amarillo *et al.*, 2008; Birnbaum *et al.*,  
605 2004; Jerng *et al.*, 2004; Kim *et al.*, 2007; Kim *et al.*, 2005; Sun *et al.*, 2011; Vacher and  
606 Trimmer, 2011), whereas auxiliary subunits MiRP1, KCR1 and TRIP8b have been implicated in  
607 regulating trafficking and properties of *h* channels assembled with main subunits from the HCN  
608 family of proteins. Additionally, the properties of *h* channels, in terms of their voltage-  
609 dependence, their kinetics and modulation by cyclic nucleotides, are critically regulated by the  
610 specific isoforms that are expressed in conjunction with the specific stoichiometry of such  
611 expression (Biel *et al.*, 2009; He *et al.*, 2014; Lewis *et al.*, 2011; Much *et al.*, 2003; Robinson  
612 and Siegelbaum, 2003; Santoro *et al.*, 2000; Santoro *et al.*, 2009; Santoro *et al.*, 2004; Ulens and  
613 Siegelbaum, 2003; Ulens and Tytgat, 2001; Zolles *et al.*, 2009).

614           Second, targeting and functional properties of these assembled channels (Trimmer and  
615 Rhodes, 2004; Vacher *et al.*, 2008) could be critically modulated by different forms of post-  
616 translational modification (Derkach *et al.*, 1999; Derkach *et al.*, 2007; Levitan, 1994; Misonou *et*  
617 *al.*, 2004; Much *et al.*, 2003; Shah *et al.*, 2010; Sjostrom *et al.*, 2008), by local pH (Holzer,

618 2009), by interaction with intracellular messengers (Armstrong and Bezanilla, 1974) and by lipid  
619 composition of the plasma membrane (Levitan and Barrantes, 2012). For instance, trafficking of  
620 A-type K<sup>+</sup> channels is phospho-regulated in a manner that is dependent on their main and  
621 auxiliary subunits (Birnbaum *et al.*, 2004; Hammond *et al.*, 2008; Lin *et al.*, 2011; Lin *et al.*,  
622 2010; Vacher and Trimmer, 2011), and differences between proximal and distal dendritic sodium  
623 channels are partly mediated by phosphorylation states of these channels (Gasparini and Magee,  
624 2002).

625 Third, distinct channels have been demonstrated to have structural interactions with each  
626 other, thereby cross-regulating the functional properties of each other. For instance, structural  
627 interactions between Cav3 and Kv4 channel families are known to regulate neuronal activity  
628 through efficient transfer of calcium influx from Cav3 channels to bind onto KChIPs that  
629 modulate Kv4 channel function (Anderson *et al.*, 2010). Finally, these channels can undergo  
630 activity-dependent plasticity and neuromodulation (Biel *et al.*, 2009; Cantrell and Catterall,  
631 2001; He *et al.*, 2014; Hoffman and Johnston, 1999; Lee and Dan, 2012; Marder, 2012; Marder  
632 *et al.*, 2014; Marder and Thirumalai, 2002; Robinson and Siegelbaum, 2003), which also could  
633 result in important changes to their trafficking and functional properties (Sec. 3.6).

634 How do these channels maintain specific location-dependent levels of expression with  
635 specific properties despite this staggering complexity that results in their assemblage and specific  
636 function? From the description above, it is clear that channels achieve specific properties and  
637 localization through multiple structural routes involving several subunits, enzymes associated  
638 with post-translational modification, neuromodulators and their receptors and several signaling  
639 cascades (also see Sec. 3.4–3.6). This follows the observation that each functional property of the  
640 channel, including its localization and targeting, is regulated by multiple mechanisms, each

641 endowed with the ability to bidirectionally modulate the functional property. Therefore, the  
642 combinatorial complexity of regulation and the involvement of different structural routes to  
643 achieve similar function together provide ample lines of evidence for the expression of  
644 degeneracy in achieving specific function for channels and receptors expressed in the  
645 hippocampus. In answering the question on how robustness might be achieved, the argument  
646 within the framework of degeneracy would be that functional robustness in the assemblage,  
647 targeting and function of ion channels is achieved as a *consequence* of the underlying regulatory  
648 and interactional complexity.

649

### 650 **3.2. Degeneracy in neuronal physiological properties**

651 The presence of various ligand and voltage dependent ion channels confers signature  
652 neurophysiological properties, such as input resistance, firing rate, frequency selectivity and  
653 integration and propagation of potentials across axonal and dendritic processes, upon different  
654 hippocampal neurons (Hutcheon and Yarom, 2000; Johnston *et al.*, 1996; Llinas, 1988).  
655 Although there is remarkable variability in these measurements even within a single neuronal  
656 subtype (Dougherty *et al.*, 2012; Dougherty *et al.*, 2013; Malik *et al.*, 2016), different neuronal  
657 subtypes within the same subregion have signature electrophysiological characteristics  
658 (Anderson P, 2007; Freund and Buzsaki, 1996; Klausberger and Somogyi, 2008; Spruston, 2008)  
659 that are maintained despite the combinatorial complexity of ion channels expressed in these  
660 neurons. Additionally, prominent relationships between intrinsic neurophysiological properties  
661 and various pathological conditions, including epilepsy and Fragile X mental disorder, have been  
662 reported across several neurological disorders (Beck and Yaari, 2008; Bernard *et al.*, 2007;  
663 Brager and Johnston, 2014; Johnston *et al.*, 2016; Kullmann, 2002; Lee and Jan, 2012;



664 Lehmann-Horn and Jurkat-Rott, 1999; Lerche *et al.*, 2013; Poolos and Johnston, 2012). Thus,  
665 from the maintaining robust physiology and from the perspective of avoiding pathological  
666 excitability conditions, it is essential that neurons maintain their signature electrophysiological  
667 characteristics.

668         It is now recognized across systems that there is no one-to-one relationship between  
669 neurophysiological properties and the channels that regulate them (Sec. 2.1–2.3, Fig. 2–3). It is  
670 established that several channels contribute to the emergence and regulation of a specific  
671 physiological property, and the same channel could regulate several physiological properties,  
672 resulting in a many-to-many mapping between channels and physiological properties. In addition  
673 to the example assessing degeneracy in resonance properties (Sec. 2.1–2.2, Fig. 2–3), we could  
674 also consider the example of maintaining neuronal firing rates at specific levels. Whereas fast  
675 Na<sup>+</sup> and delayed rectifier K<sup>+</sup> channels mediate action potential firing in hippocampal neurons,  
676 their firing rate profiles are regulated by an array of ion channels including the A-type K<sup>+</sup>, HCN,  
677 GIRK, M-type K<sup>+</sup> and SK channels (Adelman *et al.*, 2012; Gasparini and DiFrancesco, 1997; Gu  
678 *et al.*, 2005; Hu *et al.*, 2007; Kim and Johnston, 2015; Kim *et al.*, 2005; Malik and Johnston,  
679 2017; Narayanan and Johnston, 2007; Rathour *et al.*, 2016).

680         These observations provide specific insights about the relationship between channels and  
681 physiological properties (Sec. 2.1–2.3; Fig. 2–3). First, there is degeneracy in the emergence of  
682 neurophysiological properties, where disparate combinations of channels could come together to  
683 elicit similar functional properties (Das *et al.*, 2017; Drion *et al.*, 2015; Foster *et al.*, 1993;  
684 Goldman *et al.*, 2001; Marder, 2011; Marder and Goaillard, 2006; Rathour *et al.*, 2016; Rathour  
685 and Narayanan, 2012a, 2014; Taylor *et al.*, 2009).

686           Second, the dependence of different physiological properties on distinct channels is  
687 variable even within the same neuronal subtype, and is a function of the variable expression  
688 profiles of these channels (Drion *et al.*, 2015; O'Leary *et al.*, 2014; Rathour and Narayanan,  
689 2014; Taylor *et al.*, 2009). For instance, whereas *A*-type K<sup>+</sup> channels might contribute maximally  
690 to maintaining firing rates at a specific level in one neuron, in another neuron of the same  
691 subtype it could be SK channels.

692           Third, the dependence of different physiological properties in the *same* neuron on distinct  
693 channels is differential and variable, where pharmacological blockade of one channel may have a  
694 stronger effect on a specific physiological property compared to another (Rathour *et al.*, 2016).  
695 As a consequence of these observations, there is a dissociation between robust maintenance of  
696 one physiological property and that of another (Srikanth and Narayanan, 2015). Maintenance of  
697 only a few physiological properties would not necessarily translate to maintenance of all  
698 physiologically relevant properties. All relevant physiological properties ought to be explicitly  
699 maintained for overall robustness.

700           Fourth, hippocampal neurons are endowed with complex dendritic arborization with  
701 several well-defined functional maps expressing along their somato-dendritic arbor, making  
702 proteostasis, or protein homeostasis (Balch *et al.*, 2008), in these neurons a complex problem  
703 (Hanus and Schuman, 2013; Narayanan and Johnston, 2012). Despite the strong structural  
704 constraint of maintaining robustness of several tightly coupled location-dependent functional  
705 measurements, it has been demonstrated that it is not essential to maintain individual channels at  
706 specific densities or with specific properties for achieving robust functional homeostasis. Instead,  
707 several disparate combinations of channel parameters, spanning properties and densities of  
708 several channels, could robustly maintain *concomitant* homeostasis of multiple functions across

709 the dendritic arbor (Rathour and Narayanan, 2014). It is however essential to note that dendritic  
710 morphology plays a crucial role in regulating intrinsic properties and their location-dependent  
711 characteristics, especially in electrotonically *non-compact* hippocampal pyramidal neurons  
712 (Dhupia *et al.*, 2015; Golding *et al.*, 2005; Krichmar *et al.*, 2002; Mainen and Sejnowski, 1996;  
713 Narayanan and Chattarji, 2010; Spruston *et al.*, 1994; Spruston *et al.*, 1993), and could contribute  
714 to degeneracy in the emergence of single-neuron physiology.

715 Finally, depending on the localization profiles and voltage-dependent properties of  
716 different channels they may or may not spatiotemporally interact (Migliore and Migliore, 2012;  
717 Mishra and Narayanan, 2015; Rathour and Narayanan, 2012b). For instance, owing to mostly  
718 non-overlapping voltage-dependence and localization profiles, *M*-type  $K^+$  and HCN channels  
719 mediate complementary somato-dendritic theta filtering in hippocampal neurons (Hu *et al.*,  
720 2009; Narayanan and Johnston, 2007, 2008). In contrast, *A*-type  $K^+$  and HCN channels strongly  
721 overlap both in their voltage-dependence and localization, resulting in their ability to co-regulate  
722 the same form of resonance in hippocampal pyramidal neurons (Rathour *et al.*, 2016; Rathour  
723 and Narayanan, 2012a, 2014)

724 These insights are driven by experimental observations coupled with physiologically  
725 relevant computational models that allowed greater flexibility in terms of understanding  
726 mechanistic basis, importance of ion channel interactions and the degree of contribution of each  
727 channel type in regulating neuronal properties. Multi parametric multi objective stochastic search  
728 algorithms are a class of algorithms that has been employed as an extremely effective method to  
729 explore cellular-level degeneracy in a systematic and rigorous manner through global sensitivity  
730 analysis (Anirudhan and Narayanan, 2015; Drion *et al.*, 2015; Foster *et al.*, 1993; Goldman *et al.*,  
731 2001; Mukunda and Narayanan, 2017; Rathour and Narayanan, 2012a, 2014; Taylor *et al.*,

2009). These algorithms provide a quantitative route to understanding the structure of the global parametric space in any given model, without making explicit assumptions about co-variation of different parameters test the robustness of the system to parametric variability. In this technique, model neurons generated by uniform random sampling of the global parametric space are tested against experimental statistics of several measurements. Model neurons that satisfy *several* experimental constraints are declared as “valid models”. The use of multiple measurements to establish the validity of models is essential because of afore-mentioned (Sec. 2.1–2.3) dissociation between different forms of homeostasis and the differential dependence of different measurements on distinct constitutive components (Fig. 2–3). It is well recognized in the design principle of these techniques that establishing physiological equivalence of only a partial set of measurements *does not* necessarily ensure that the other measurements which have not been constrained by the validation process are within the physiological ranges (Achard and De Schutter, 2006; Foster *et al.*, 1993; Goldman *et al.*, 2001; Hobbs and Hooper, 2008; Marder, 2011; Marder and Goillard, 2006; Marder and Taylor, 2011; Prinz *et al.*, 2003; Prinz *et al.*, 2004; Rathour and Narayanan, 2012a, 2014; Srikanth and Narayanan, 2015; Taylor *et al.*, 2009; Tobin *et al.*, 2006; Weaver and Wearne, 2008). If such a stochastic search algorithm fails to yield any valid model that satisfies all the physiological objectives, the interpretation should not be that the specified model configuration is incapable of achieving all objectives. This is because the stochastic search does not *entirely* span the global parametric space, thereby allowing for the possibility that valid solutions could exist within the unexamined regions of this parametric space.

Once the validity of a (typically small) subset of models through multiple physiological constraints is established, the approach has been employed to explore degeneracy by assessing

755 pair-wise and cross-dependencies across different parameters. Pairwise correlations across valid  
756 model parametric values are typically employed to explore such dependencies, where a strong  
757 correlation between any two parameters is interpreted as a pointer to potential co-regulation of  
758 biological mechanisms defining these parameters (Anirudhan and Narayanan, 2015; Foster *et al.*,  
759 1993; Goldman *et al.*, 2001; Mukunda and Narayanan, 2017; Rathour and Narayanan, 2012a,  
760 2014; Taylor *et al.*, 2009). These analyses also provide insights about how critically specific  
761 parameters should be regulated to achieve the *multiple* objectives imposed by the validation  
762 criteria. Importantly, these algorithms provide a quantitative route to finding the relative  
763 sensitivities of different measurements to each channel that contributed to the emergence of  
764 robust functionality spanning multiple measurements. It is recognized that the dependence of  
765 measurements on individual channels would be variable given that different model neurons are  
766 endowed with considerable variability in each channel conductance. However, it is still known  
767 that the average dependence of a given measurement (say resonance frequency) is higher for one  
768 specific channel (say HCN channels), *relative* to the other channels expressed in the system.  
769 Different methodologies have been proposed to assess these relative contributions and have been  
770 effectively employed to understand the differential and variable dependencies of different  
771 measurements on each underlying channel (O'Leary *et al.*, 2014; Rathour and Narayanan, 2014;  
772 Taylor *et al.*, 2009).

773         Together, through a confluence of electrophysiological and computational techniques that  
774 assessed variability and homeostasis in neuronal and channel properties, the expression of  
775 degeneracy in the emergence of single neuron physiology is well established across several  
776 systems, including the mammalian hippocampus. It is clear that disparate combinations of  
777 morphological and channel parameters could robustly yield analogous single neuron physiology,

778 despite being constrained by *multiple* measurements that span the entire somato-dendritic arbor  
779 of the *same* neuron.

780

### 781 **3.3. Degeneracy in calcium regulation and in the induction of synaptic plasticity**

782 Whereas the ability to maintain baseline physiological measurements at specific levels is  
783 important from the homeostasis perspective, the ability to alter responses (through changes in  
784 parameters) towards achieving a specific target is important from the perspective of learning or  
785 encoding. This ability to undergo long-term plasticity is absolutely critical in an encoding  
786 system. One of the most well studied forms of long-term plasticity in hippocampal neurons is  
787 plasticity in synaptic structures. There are several lines of evidence for degeneracy in the  
788 induction, expression and maintenance of long-term synaptic plasticity and the mechanisms that  
789 are associated with each of these distinct phases of synaptic plasticity. As long-term synaptic  
790 plasticity is relatively well studied, we will first outline these lines of evidence from the synaptic  
791 plasticity perspective and then switch to the implications for *concomitant* non-synaptic plasticity  
792 that typically accompanies synaptic plasticity.

793 A popular methodology to study long-term synaptic plasticity in neurons within the  
794 hippocampus and other brain structures is the use of specific induction protocols that result in  
795 synaptic plasticity. These induction protocols are activity-dependent, and are typically induced  
796 by combinations of presynaptic stimulation and/or postsynaptic current injection. There are also  
797 several chemical protocols for inducing synaptic plasticity, say through depolarization induced  
798 through elevated levels of extracellular potassium or potassium channel blockers (Hanse and  
799 Gustafsson, 1994; Huang and Malenka, 1993; Huber *et al.*, 1995; Lin *et al.*, 2008; Otmakhov *et*  
800 *al.*, 2004; Roth-Alpermann *et al.*, 2006). These protocols are critically tied to the specific

801 synaptic structures that are studied and show signature profiles across synaptic structures of  
802 similar subtypes (Abbott and Nelson, 2000). The protocols required for induction of synaptic  
803 plasticity are not unique. Several disparate protocols with very distinct combinations of  
804 presynaptic stimulation and/or postsynaptic current injection (Fig. 4) have been shown to elicit  
805 long-term potentiation (LTP) or long-term depression (LTD). The cellular mechanisms required  
806 for inducing LTP are also very different across these protocols, with differences sometimes  
807 manifesting even within a single protocol for synapses at two different locations on the same  
808 neuron. For instance, with the theta burst protocol for inducing LTP (Fig. 4A), proximal synaptic  
809 LTP requires pairing with backpropagating action potentials, but distal synapses recruit dendritic  
810 spikes and do not require backpropagating action potentials (Golding *et al.*, 2002; Kim *et al.*,  
811 2015; Magee and Johnston, 1997).

812         The ability of multiple activity protocols (Fig. 4) to elicit similar levels of synaptic  
813 plasticity might be an example of multiple realizability, but it could be argued that this does not  
814 constitute an instance of degeneracy, which requires that disparate *structural* components elicit  
815 similar function. To address this argument, we refer to established answers for one of the  
816 fundamental questions on synaptic plasticity: What is the mechanistic basis for these induction  
817 protocols to elicit synaptic plasticity? The influx of calcium into the cytosol is considered as the  
818 first step that results in the induction of LTP or LTD (Lynch *et al.*, 1983; Malenka *et al.*, 1992;  
819 Mulkey and Malenka, 1992). Quantitatively, there have been suggestions for the amplitude,  
820 spread and kinetics of cytosolic calcium elevation to be specific attributes that translate to the  
821 strength and direction of plasticity (Larkman and Jack, 1995; Lisman, 1989; Lisman, 2001;  
822 Shouval *et al.*, 2002). From this perspective, it may be argued that disparate protocols for  
823 inducing LTP (or LTD) result in similar amplitude, spread and kinetics of calcium elevation,

824 thereby resulting in similar strength of LTP (or LTD). With calcium elevation established as a  
825 mechanistic basis for the induction of synaptic plasticity, the question of degeneracy here should  
826 now focus on the structural basis for eliciting similar elevation in cytosolic calcium.

827         The mechanisms that govern the strength, spread and kinetics of neuronal calcium are  
828 well studied (Augustine *et al.*, 2003; Berridge, 1998, 2002, 2006; Berridge *et al.*, 2000; Frick *et*  
829 *al.*, 2003; Higley and Sabatini, 2012; Jaffe *et al.*, 1992; Miyakawa *et al.*, 1992; Rizzuto and  
830 Pozzan, 2006; Ross, 2012; Sabatini *et al.*, 2002; Yasuda *et al.*, 2004). Briefly, synergistic  
831 interactions between three prominent sets of mechanisms (Fig. 5) regulate cytosolic calcium  
832 levels, especially from the perspective of induction of synaptic plasticity. First, the disparate  
833 structural components through which calcium ions flow into the cytosol either from the  
834 extracellular matrix or from the endoplasmic reticulum (ER). These are typically receptors or  
835 channels expressed on the plasma membrane or the ER membrane. The second set is built of  
836 disparate mechanisms that alter postsynaptic excitability, which mediates the conversion from  
837 synaptic current to synaptic voltage responses. Changes in excitability modulate voltage-levels,  
838 which in turn alter calcium influx through voltage-sensitive synaptic receptors or voltage-gated  
839 calcium channels. Finally, the expression of calcium-handling mechanisms such as pumps,  
840 exchangers and buffers limit the spatiotemporal spread of calcium thereby maintaining  
841 specificity of signaling, apart from regulating the strength and kinetics of calcium influx. Thus  
842 there are disparate mechanisms that regulate calcium influx, and non-unique combinations of  
843 these mechanisms could yield similar strength and kinetics of calcium influx in response to  
844 different induction protocols.

845         Importantly, electrophysiological recordings coupled with pharmacological treatments  
846 provide strong lines of evidence that induction of synaptic plasticity could indeed be mediated



847 and regulated by these distinct components. Specifically, there are strong lines of evidence that  
848 the induction of bidirectional synaptic plasticity in the hippocampus is mediated by different  
849 calcium sources, with certain protocols requiring synergistic activation of multiple calcium  
850 sources (Brager and Johnston, 2007; Christie *et al.*, 1996; Golding *et al.*, 2002; Huber *et al.*,  
851 1995; Nishiyama *et al.*, 2000; Raymond, 2007). These studies show that plasticity induction is  
852 dependent on influx of calcium through NMDA receptors (Christie *et al.*, 1996; Collingridge and  
853 Bliss, 1987; Collingridge *et al.*, 1983; Morris *et al.*, 1986; Mulkey and Malenka, 1992;  
854 Nishiyama *et al.*, 2000; Tsien *et al.*, 1996; Wang *et al.*, 2003), voltage-gated calcium channels  
855 (Brager and Johnston, 2007; Christie *et al.*, 1996; Christie *et al.*, 1997; Johnston *et al.*, 1992;  
856 Moosmang *et al.*, 2005; Nicholson and Kullmann, 2017; Wang *et al.*, 2003), store-operated  
857 calcium channels (Baba *et al.*, 2003; Garcia-Alvarez *et al.*, 2015; Majewski and Kuznicki, 2015;  
858 Majewski *et al.*, 2016; Prakriya and Lewis, 2015) and receptors on the ER activated by  
859 metabotropic receptors on the plasma membrane (Huber *et al.*, 2000; Nishiyama *et al.*, 2000;  
860 Verkhratsky, 2002). Additionally, voltage-gated channels and their auxiliary subunits  
861 (Anirudhan and Narayanan, 2015; Brager *et al.*, 2013; Chen *et al.*, 2006; Chung *et al.*, 2009a;  
862 Chung *et al.*, 2009b; Johnston *et al.*, 2003; Jung *et al.*, 2008; Kim *et al.*, 2007; Lin *et al.*, 2008;  
863 Lujan *et al.*, 2009; Malik and Johnston, 2017; Nolan *et al.*, 2004; Sehgal *et al.*, 2013; Shah *et al.*,  
864 2010; Watanabe *et al.*, 2002) have also been shown to critically regulate the strength and  
865 direction of synaptic plasticity. Thus, several structural components that mediate or modulate  
866 calcium influx into the cytosol have been demonstrated as critical regulators of the induction of  
867 synaptic plasticity, both from the qualitative perspective of expression of plasticity and the  
868 quantitative perspective of the specific levels of plasticity attained with an induction protocol.  
869 Finally, computational modeling has demonstrated that similar synaptic plasticity profiles could

870 be achieved through disparate combinations of channels and receptors (Anirudhan and  
871 Narayanan, 2015; Ashhad and Narayanan, 2013; Narayanan and Johnston, 2010; Shouval *et al.*,  
872 2002) and is critically dependent on the state of the synapse (Migliore *et al.*, 2015). In  
873 conjunction with the experimental studies reviewed above, these provide very strong lines of  
874 evidence for degeneracy in the induction of synaptic plasticity, where similar levels of calcium  
875 influx and analogous synaptic plasticity could be achieved through disparate combinations of  
876 parameters that synergistically regulate calcium influx (Fig. 4B).

877

### 878 **3.4. Degeneracy in signaling cascades that regulate synaptic plasticity**

879

880 What follows calcium elevation in the process of inducing synaptic plasticity? Once specific  
881 strengths and kinetics of calcium influx are achieved as a consequence of induction protocols  
882 activating the several disparate mechanisms, is the route to the expression of synaptic plasticity  
883 unique? Could multiple mechanisms be activated in response to similar elevations of cytosolic  
884 calcium towards achieving specific levels of synaptic plasticity? In other words, is there  
885 degeneracy in terms of distinct pathways involving different constitutive components that could  
886 link the induction of synaptic plasticity to its expression?

887 The large body of literature on the signaling cascades involved in synaptic plasticity has  
888 presented several lines of evidence that there are several signaling routes, contributing  
889 synergistically or differentially, to achieving the translation from the induction of synaptic  
890 plasticity to its expression (Fig. 6). Specifically, there is evidence that there are several  
891 biochemical species that control synaptic efficacy through a complex network of  
892 spatiotemporally interacting signaling cascades (Bhalla, 2014; Bhalla and Iyengar, 1999;  
893 Derkach *et al.*, 2007; Kennedy, 2000; Kennedy *et al.*, 2005; Kholodenko, 2006; Kotaleski and  
894 Blackwell, 2010; Larkman and Jack, 1995; Manninen *et al.*, 2010; Neves and Iyengar, 2009;

895 Neves *et al.*, 2008b; Regehr *et al.*, 2009; Weng *et al.*, 1999). It is also clear that the dominance of  
896 any specific cascade that determines the strength and direction of plasticity is dependent on  
897 synaptic state (Migliore *et al.*, 2015), the protocol employed (Kandel *et al.*, 2014; Mayford *et al.*,  
898 2012) and on the spatiotemporal dynamics of changes in the postsynaptic calcium concentration  
899 (Berridge, 1998; Korte and Schmitz, 2016; Lisman, 1989; Lisman, 2001; Parekh, 2008; Rizzuto  
900 and Pozzan, 2006).

901         The biochemical signaling diversity involved in synaptic plasticity spans both the pre-  
902 and post-synaptic sides. The signaling cascades involved in the translation of induction to  
903 expression include several enzymes that mediate posttranslational modification of disparate  
904 protein substrates, protein synthesis regulators, retrograde messengers, protein trafficking  
905 regulators and mechanisms mediating structural plasticity. As a specific example, with reference  
906 to the diversity of enzymes that are involved in post-translational modifications resulting in the  
907 expression of synaptic plasticity, it has been shown that different protocols for inducing LTP in  
908 the Schaffer collateral synapses projecting to CA1 are differentially dependent on different  
909 kinases (Kandel, 2001; Kandel *et al.*, 2014; Manninen *et al.*, 2010; Mayford *et al.*, 2012;  
910 Raymond, 2007; Soderling and Derkach, 2000). Example kinases are the calcium-calmodulin  
911 kinase II, CaMKII (Lisman *et al.*, 2002; Lisman *et al.*, 2012; Malinow *et al.*, 1989; Ouyang *et*  
912 *al.*, 1997; Ouyang *et al.*, 1999), protein kinase A, PKA (Frey *et al.*, 1993; Lin *et al.*, 2008;  
913 Otmakhova *et al.*, 2000; Rosenkranz *et al.*, 2009; Woo *et al.*, 2003) and mitogen associated  
914 protein kinase, MAPK (English and Sweatt, 1997; Rosenkranz *et al.*, 2009), which could be  
915 activated with the same or different LTP protocols. For instance, the theta-burst pairing protocol  
916 activates all of CaMKII, MAPK and PKA (Fan *et al.*, 2005; Lin *et al.*, 2008; Rosenkranz *et al.*,  
917 2009), with very different target substrates involving different channels and receptors (see Sec.

918 3.6). Additionally the expression of synaptic plasticity, or the substrate for altered synaptic  
919 efficacy, could be dependent on several factors (Sec. 3.5), each of which could undergo distinct  
920 plasticity with reference to the same activity protocols (Sec. 3.6). Together, the possible  
921 combinations of mechanisms that could mediate the translation of plasticity induction protocol to  
922 plasticity expression, even for a single synaptic subtype, are numerous. There are also lines of  
923 evidence that similar strength and direction of synaptic plasticity could be achieved through the  
924 activation of disparate combinations of these mechanisms, providing evidence for the  
925 manifestation of degeneracy in the signaling cascades that mediate the transition from plasticity  
926 induction to expression.

927

### 928 **3.5. Degeneracy in the expression of synaptic plasticity**

929 The above analyses establish that hippocampal neurons exhibit degeneracy with reference to the  
930 induction of synaptic plasticity and in terms of the mechanisms that mediate the transition from  
931 induction to expression. Do these mechanisms act in concert to alter a single target to effectuate  
932 the expression of synaptic plasticity? Or are there multiple targets that could be altered to  
933 achieve similar strength and direction of synaptic plasticity in a specific synapse?

934 From the very first study that demonstrated LTP, it has been clear that the protocols  
935 employed for inducing synaptic plasticity can recruit different structural components (Bliss and  
936 Lomo, 1973):

937 “The results suggest that two independent mechanisms are responsible for long-  
938 lasting potentiation: (a) an increase in the efficiency of synaptic transmission at the  
939 perforant path synapses; (b) an increase in the excitability of the granule cell  
940 population.”

941

942 Several studies that followed up on this landmark study have now clearly shown that there are  
943 disparate routes to achieving synaptic plasticity, even with very similar strength and the same

944 direction of plasticity (Fig. 7). It is now well established that the expression of synaptic plasticity  
945 could recruit mechanisms spanning pre- and post-synaptic components, including  
946 channels/receptors, morphological features and cytoplasmic constituents on either side (Fig. 7).  
947 In other words, different combinations of changes in presynaptic channels/receptors, release  
948 mechanisms and postsynaptic channels/receptors could mediate the expression of synaptic  
949 plasticity.

950         The framework of degeneracy provides an ideal way to reconcile the thorny debates  
951 regarding pre- and post-synaptic mechanisms that could mediate synaptic plasticity. Specifically,  
952 within this framework, pre- and post-synaptic components would be considered simply as *a*  
953 *subset* (see Sec. 3.6) of the broad repertoire of mechanisms that are available to the neural system  
954 to alter towards achieving a specific level of synaptic plasticity or accomplishing an encoding  
955 task. Disparate combinations of these components could synergistically contribute to the  
956 expression of specific levels of plasticity, at times even with temporal differences in the  
957 expression of plasticity in different components. The specific combination of changes that are  
958 recruited to mediate plasticity for a chosen protocol or for a given behavioral task would then be  
959 state-dependent, critically reliant on the specific calcium sources (Sec. 3.3) and signaling  
960 cascades (Sec. 3.4) that were recruited in response to the induction protocol or a behavioral task.  
961 In addition to these neuronal components, glial cells, through several mechanisms including  
962 gliotransmission or transmitter reuptake and recycling mechanisms, have also been shown to  
963 play a critical role in synaptic plasticity (Araque *et al.*, 2014; Ashhad and Narayanan, 2016;  
964 Halassa *et al.*, 2007; Haydon and Carmignoto, 2006; Henneberger *et al.*, 2010; Pannasch and  
965 Rouach, 2013; Perea and Araque, 2007; Perea *et al.*, 2016; Zorec *et al.*, 2012), thereby adding

966 another layer of parameters and another set of interactional complexity to the mechanistic basis  
967 for synaptic plasticity.

968         This combinatorial complexity of parameters and associated interactions provide a strong  
969 foundation for degeneracy in the emergence of not just the induction and expression of long-term  
970 plasticity, but also in the emergence of short-term synaptic plasticity. Specifically, several of the  
971 components involved in the induction and expression of long-term plasticity have also been  
972 shown to play critical roles in short-term forms of plasticity such as paired pulse facilitation, and  
973 on the synaptic filters that they mediate (Atwood *et al.*, 2014; Bouchard *et al.*, 2003; De Pitta *et*  
974 *al.*, 2011; Dittman *et al.*, 2000; Emptage *et al.*, 2001; Fioravante and Regehr, 2011; Fortune and  
975 Rose, 2001; Regehr, 2012; Siegelbaum, 2000; Zucker, 1989, 1999; Zucker and Regehr, 2002).  
976 These observations, in conjunction with quantitative computational models have led to the  
977 suggestion for the manifestation of degeneracy in the emergence of short-term plasticity profiles  
978 and associated synaptic filters (Mukunda and Narayanan, 2017). Specifically, it has been  
979 demonstrated that analogous synaptic filters emerge from disparate combinations of presynaptic  
980 parameters (Mukunda and Narayanan, 2017). Together, these observations provide clear lines of  
981 evidence for the manifestation of degeneracy in short- and long-term forms of synaptic plasticity  
982 in the hippocampus.

983

### 984 **3.6. Degeneracy in the induction and expression of non-synaptic plasticity**

985

986 It is now widely acknowledged that plasticity protocols and learning paradigms that were once  
987 assumed to exclusively recruit or induce synaptic plasticity also induce plasticity in other  
988 components (Fig. 8), in a manner that could either be localized or global. Similar to the study of  
989 synaptic plasticity, specific activity protocols (most of which are similar, if not identical, to  
990 synaptic plasticity protocols) are employed to assess plasticity in other protein molecules and

991 structural changes. Plasticity in voltage-gated ion channels and other neuronal components that  
992 result in changes to neuronal intrinsic properties have been dubbed as *intrinsic plasticity*, and is  
993 known to occur in the hippocampus with reference to most activity-dependent protocols  
994 employed for inducing synaptic plasticity (Brager and Johnston, 2007; Chung *et al.*, 2009a;  
995 Chung *et al.*, 2009b; Fan *et al.*, 2005; Frick and Johnston, 2005; Frick *et al.*, 2004; Johnston *et*  
996 *al.*, 2003; Johnston and Narayanan, 2008; Kim and Linden, 2007; Lin *et al.*, 2008; Losonczy *et*  
997 *al.*, 2008; Magee, 2000; Mozzachiodi and Byrne, 2010; Narayanan and Johnston, 2007, 2008,  
998 2012; Nelson and Turrigiano, 2008; Remy *et al.*, 2010; Sjöstrom *et al.*, 2008; Spruston, 2008;  
999 Wang *et al.*, 2003; Zhang and Linden, 2003). Although it is generally assumed that intrinsic  
1000 plasticity refers only to global changes in intrinsic *excitability*, it is important to recognize that  
1001 intrinsic plasticity encompasses *all* intrinsic properties that are mediated by neuronal constitutive  
1002 components (Llinas, 1988; Marder, 2011; Marder *et al.*, 1996; Marder and Goaillard, 2006),  
1003 including neuronal spectral selectivity conferred by specific sets of ion channels (Das *et al.*,  
1004 2017; Hutcheon and Yarom, 2000) and calcium wave propagation mediated by receptors on the  
1005 endoplasmic reticulum (Ross, 2012). These distinct intrinsic properties, including excitability,  
1006 have been shown to undergo bidirectional changes in a manner that is local to specific neuronal  
1007 locations or is global spanning all locations (Brager and Johnston, 2007; Das *et al.*, 2017;  
1008 Johnston and Narayanan, 2008; Narayanan *et al.*, 2010; Narayanan and Johnston, 2007, 2008).

1009         As the protocols employed for inducing non-synaptic (including intrinsic and structural)  
1010 plasticity are at most instances identical to synaptic plasticity induction protocols, the broad  
1011 mechanisms involved in the induction and in the translation of induction to expression are very  
1012 similar to those for synaptic plasticity (Fig. 8). Specifically, induction of intrinsic plasticity  
1013 requires influx of cytosolic calcium with different kinetics and strengths of calcium translating to

1014 distinct strengths and directions of intrinsic plasticity (Brager and Johnston, 2007; Fan *et al.*,  
1015 2005; Huang *et al.*, 2005; Sjöstrom *et al.*, 2008; Wang *et al.*, 2003). The components that  
1016 mediate calcium entry for synaptic plasticity also mediate calcium entry for non-synaptic  
1017 plasticity, including NMDA receptors (Chung *et al.*, 2009a; Chung *et al.*, 2009b; Engert and  
1018 Bonhoeffer, 1999; Fan *et al.*, 2005; Frick *et al.*, 2004; Huang *et al.*, 2005; Lin *et al.*, 2008;  
1019 Losonczy *et al.*, 2008; Matsuzaki *et al.*, 2004; Nagerl *et al.*, 2004; Narayanan and Johnston,  
1020 2007; Tonnesen *et al.*, 2014; Wang *et al.*, 2003), voltage-gated calcium channels (Chung *et al.*,  
1021 2009a; Chung *et al.*, 2009b; Lin *et al.*, 2008; Wang *et al.*, 2003) and receptors on the ER  
1022 (Ashhad *et al.*, 2015; Brager and Johnston, 2007; Brager *et al.*, 2013; Clemens and Johnston,  
1023 2014; Kim *et al.*, 2017; Narayanan *et al.*, 2010). This implies that the arguments (Secs. 3.3–3.4)  
1024 placed about synergistic interactions between different calcium sources and about degeneracy in  
1025 the induction of synaptic plasticity extends to the induction of non-synaptic plasticity as well  
1026 (Fig. 8).

1027         As a direct consequence of the similarity in the protocols employed in inducing synaptic  
1028 and intrinsic plasticity, the downstream mechanisms that mediate the translation from induction  
1029 of non-synaptic plasticity to its expression are also similar (Shah *et al.*, 2010) to those that  
1030 mediate a similar transition in synaptic plasticity (Fig. 8). Several signaling cascades that are  
1031 present on the pre- and post-synaptic sides mediate this translation, with retrograde messengers  
1032 acting as mechanisms that signal the elevation of postsynaptic calcium to the presynaptic  
1033 terminals. Specifically, the same set of enzymes and messengers that mediate synaptic plasticity  
1034 also mediate non-synaptic plasticity (Fig. 8). Examples to this equivalence include non-synaptic  
1035 forms of plasticity that are mediated by CaMKII (Fan *et al.*, 2005; Huang *et al.*, 2005; Lujan *et*  
1036 *al.*, 2009; Matsuzaki *et al.*, 2004; Wang and Wagner, 1999), PKA (Lin *et al.*, 2008; Narayanan *et*



1037 *al.*, 2010; Rosenkranz *et al.*, 2009) and MAPK (Rosenkranz *et al.*, 2009; Yuan *et al.*, 2002).  
1038 However, there could be dissociation between the mechanisms that are involved in the  
1039 translation to the expression of different forms of plasticity that are consequent to the *same*  
1040 induction protocol, where different enzymes and messengers mediate different forms of plasticity  
1041 (Brager and Johnston, 2007; Fan *et al.*, 2005; Lin *et al.*, 2008; Rosenkranz *et al.*, 2009; Wang *et*  
1042 *al.*, 2003). As mentioned earlier (Sec. 3.5), the expression of plasticity in synapses could be  
1043 mediated by plasticity in voltage-gated calcium channels that are expressed in the presynaptic  
1044 terminal, mediated by retrograde messengers and presynaptic signaling cascades, or by change in  
1045 mechanisms that alter postsynaptic excitability, thus blurring the distinction between synaptic  
1046 and certain forms of non-synaptic plasticity.

1047       Following the activation of different signaling cascades, akin to the expression of  
1048 synaptic plasticity, several molecular processes, including synthesis, trafficking and post-  
1049 translational modification of the several membrane and cytosolic proteins, mediate the final step  
1050 towards the expression of distinct forms of non-synaptic plasticity (Fig. 8). The mechanisms  
1051 behind the trafficking of several ion channels have been studied (Cusdin *et al.*, 2008; Jensen *et*  
1052 *al.*, 2011; Lai and Jan, 2006; Lau and Zukin, 2007; Lujan *et al.*, 2009; Shah *et al.*, 2010; Vacher  
1053 *et al.*, 2008; Wenthold *et al.*, 2003), and it is now clear that plasticity is ubiquitous (Kim and  
1054 Linden, 2007). In addition to these changes in cytosolic and membrane proteins, it has been  
1055 shown that hippocampal spines undergo continuous structural changes, apart from  
1056 demonstrations of distinct forms of structural plasticity in spines, dendrites and axons (Attardo *et*  
1057 *al.*, 2015; Chen *et al.*, 2014; Emoto, 2011; Engert and Bonhoeffer, 1999; Ghiretti and Paradis,  
1058 2014; Grubb and Burrone, 2010a, b; Grubb *et al.*, 2011; Ikegaya *et al.*, 2001; Johnston *et al.*,  
1059 2016; Luo and O'Leary, 2005; Matsuzaki *et al.*, 2004; Nagerl *et al.*, 2004; Tonnesen *et al.*, 2014;

1060 Yuste and Bonhoeffer, 2001). Finally, the dynamics associated with the various glial functions  
1061 and their interactions with neuronal and metabolic pathways could also undergo changes in  
1062 response to behavioral experiences and activity (Araque *et al.*, 2014; Baumann and Pham-Dinh,  
1063 2001; Fields, 2010; Halassa and Haydon, 2010; Haydon and Carmignoto, 2006; Khakh and  
1064 Sofroniew, 2015; Pannasch and Rouach, 2013; Perea *et al.*, 2016; Sierra *et al.*, 2014; Volterra *et*  
1065 *al.*, 2014). It is therefore clear that there is no escape from the conclusion that activity- or  
1066 experience- or pathology-dependent plasticity does not confine itself to a few constitutive  
1067 components, but is rather expansive and even ubiquitous (Kim and Linden, 2007). There are  
1068 considerable overlaps in the mechanisms that mediate the induction and expression of these  
1069 forms of plasticity, and many-to-one and one-to-many mappings between the induction protocol  
1070 (or behavioral experience) and achieving specific levels of plasticity in specific components (Fig.  
1071 8).

1072         In summary, the lines of evidence provided above point to ample evidence for  
1073 degeneracy in the process of their induction and expression of different forms of plasticity and  
1074 their combinations, both in terms of their individual strengths and directions. This also implies  
1075 that the same functional changes could be achieved through distinct combinations of plasticity  
1076 mechanisms, thus pointing to a further dissociation between functional homeostasis and the  
1077 plasticity mechanisms that yielded it. In other words, functional equivalence in terms of  
1078 transition from one state to another does not necessarily translate to plasticity equivalence (where  
1079 the route taken to achieve the transition is always identical). An important class of plasticity  
1080 models has recognized the ubiquitous nature of plasticity, with models built within this  
1081 framework of plasticity degeneracy. These models account for concomitant changes in multiple  
1082 components, also accounting for disparate combinations of plasticity resulting in similar

1083 functional outcomes, rather than assuming plasticity equivalence in the face of functional  
1084 equivalence (Abbott and LeMasson, 1993; Anirudhan and Narayanan, 2015; LeMasson *et al.*,  
1085 1993; Mukunda and Narayanan, 2017; O'Leary *et al.*, 2013; O'Leary *et al.*, 2014; Siegel *et al.*,  
1086 1994; Srikanth and Narayanan, 2015). Future theoretical and experimental investigations into  
1087 hippocampal plasticity should therefore account for the truly ubiquitous nature of plasticity in  
1088 designing their experiments and addressing outstanding questions, rather than assuming that  
1089 plasticity is confined to one single component or the other (Bhalla, 2014; Kim and Linden,  
1090 2007).

1091

### 1092 **3.7. Degeneracy in metaplasticity and in maintaining stability of learning**

1093 Hebbian synaptic plasticity is inherently unstable. In the absence of concomitant homeostatic  
1094 mechanisms, Hebbian plasticity would result in runaway excitation (Fig. 9). Several theories and  
1095 mechanisms have been proposed as a means to avoid this runaway excitation (Abbott, 2003;  
1096 Abraham and Robins, 2005; Korte and Schmitz, 2016; Miller and MacKay, 1994; Nelson and  
1097 Turrigiano, 2008; Turrigiano, 2007, 2011; Turrigiano, 1999, 2008, 2017; Turrigiano and Nelson,  
1098 2000; van Rossum *et al.*, 2000; Zenke *et al.*, 2017). A prominent theme that spans several such  
1099 stability theories is metaplasticity (Abraham, 2008; Abraham and Bear, 1996; Abraham and  
1100 Tate, 1997; Hulme *et al.*, 2013), where the profile of plasticity concomitantly changes with the  
1101 induction of plasticity (Fig. 9A–B). An extremely useful mathematical treatise that has helped in  
1102 the understanding metaplasticity and stability, especially for synaptic plasticity profiles in the  
1103 hippocampus, is the Bienenstock-Cooper-Munro (BCM) rule (Bienenstock *et al.*, 1982; Cooper  
1104 and Bear, 2012; Shouval *et al.*, 2002; Yeung *et al.*, 2004). This is despite the observation that the  
1105 BCM framework and the synaptic plasticity framework in hippocampal synapses are not

1106 completely analogous to each other (Cooper *et al.*, 2004). It should also be noted that not all  
1107 synapses follow a BCM-like synaptic plasticity profile, and therefore a stability theory dependent  
1108 on this rule is not generalizable to all synapses (Abbott and Nelson, 2000; Jorntell and Hansel,  
1109 2006).

1110         Although the utility of BCM-like synaptic rule in understanding stability in synaptic  
1111 learning has been invaluable, the exact mechanisms that mediate the sliding modification  
1112 threshold and the consequent metaplasticity has remained an open question. Several mechanisms  
1113 (Fig. 9C) involving changes in morphological characteristics, several receptors, ion channels and  
1114 signaling cascades have been proposed as candidates for this role (Abraham, 2008; Abraham and  
1115 Bear, 1996; Abraham *et al.*, 2001; Abraham and Tate, 1997; Anirudhan and Narayanan, 2015;  
1116 Bear, 2003; Bear *et al.*, 1987; Cooper and Bear, 2012; Hulme *et al.*, 2013; Kalantzis and  
1117 Shouval, 2009; Narayanan and Johnston, 2010; Philpot *et al.*, 2003; Philpot *et al.*, 2001; Sehgal  
1118 *et al.*, 2013; Triesch, 2007). As any change in mechanisms that regulate the induction or  
1119 expression of synaptic plasticity would result in a change in plasticity profiles (Sec. 3.3–3.5), it is  
1120 not surprising that mechanisms that regulate synaptic plasticity are candidate mechanisms that  
1121 mediate metaplasticity. Similar to the argument placed with reference to the mechanisms that  
1122 mediate the expression of synaptic plasticity, the framework of degeneracy provides an elegant  
1123 solution to the question on which of these is *the* mechanism that mediates the sliding  
1124 modification threshold within a BCM-like plasticity framework. It offers reconciliation to this  
1125 conundrum by suggesting that disparate combinations of these distinct mechanisms could result  
1126 in similar plasticity profiles (Fig. 9D–E), thereby suggesting degeneracy in the emergence of  
1127 metaplasticity and stability in synaptic learning (Anirudhan and Narayanan, 2015). Finally, it  
1128 was traditionally assumed that stability and homeostatic mechanisms are slower compared to the

1129 encoding mechanisms. However, there are several lines of theoretical and experimental evidence,  
1130 spanning several synaptic and intrinsic components as candidate mechanisms, for *concurrent*  
1131 emergence of encoding, stability *and* activity homeostasis. These lines of evidence also argue for  
1132 prominent advantages when encoding, homeostasis and stability mechanisms are *concurrent*  
1133 (Anirudhan and Narayanan, 2015; Honnuraiah and Narayanan, 2013; Ibata *et al.*, 2008; Jedlicka  
1134 *et al.*, 2015; Johnston and Narayanan, 2008; Narayanan and Johnston, 2007, 2010; Nelson and  
1135 Turrigiano, 2008; O'Leary *et al.*, 2014; Triesch, 2007; Turrigiano, 2011; Turrigiano, 2008, 2017;  
1136 Zenke *et al.*, 2017).

1137         Within the framework of degeneracy, the goal of *concomitantly* achieving encoding-  
1138 driven plasticity, activity homeostasis and stable learning is achieved through disparate  
1139 combinations of synaptic, intrinsic, glial and structural plasticity. With abundant experimental  
1140 evidence for plasticity in each of these different components occurring in an activity- or  
1141 experience-dependent manner (Sec. 3.6), it is important that the analyses of stable learning  
1142 broaden their focus beyond the narrow realm of stable *synaptic* learning. The current theories  
1143 implicitly or explicitly assume that encoding is driven by synaptic plasticity, with several  
1144 mechanisms contributing to the stability of this synaptic learning system. The metaplasticity  
1145 framework also largely focuses on plasticity of *synaptic* plasticity profiles, although the  
1146 mechanisms that mediate several forms of plasticity overlap with each other (Sec. 3.6). Future  
1147 frameworks should therefore analyze concomitant learning *and* stability as a consequence of  
1148 disparate forms of plasticity, also assessing *metaplasticity of intrinsic, glial and structural*  
1149 *plasticity*. While plasticity in synaptic structures form *a component* of learning and stability,  
1150 given the abundant lines of experimental evidence on ubiquitous plasticity, it is extremely critical

1151 that learning and stability theories broaden their horizon to encompass all forms of plasticity and  
1152 degeneracy therein.

### 1153 **3.8. Degeneracy in the generation and regulation of local field potentials**

1154 Extracellular field recordings are useful readouts of network activity in a given brain region.  
1155 Local field potentials (LFP), the low pass filtered version of field recordings have traditionally  
1156 been thought to provide information about afferent synaptic activity. LFPs recorded from within  
1157 the hippocampus exhibit signature activity patterns that are dependent on the behavioral state of  
1158 the animal. For instance, they manifest strong oscillations in the theta frequency range (4–10 Hz)  
1159 during exploratory behavior and during rapid eye movement (REM) sleep, and show characteristic  
1160 sharp-wave ripple patterns during rest and non-REM sleep. These distinct activity patterns have  
1161 been postulated to serve specific functions such as in the consolidation of memory and in neural  
1162 encoding of space (Buzsaki, 1986, 1989, 2002, 2006, 2015; Buzsaki and Moser, 2013; Colgin,  
1163 2013; English *et al.*, 2014; Grosmark *et al.*, 2012; Hartley *et al.*, 2014; Lisman and Jensen, 2013;  
1164 Mizuseki and Buzsaki, 2014; Montgomery *et al.*, 2008; Moser *et al.*, 2008; Moser *et al.*, 2015;  
1165 Tononi and Cirelli, 2006; Wilson and McNaughton, 1994; Ylinen *et al.*, 1995a; Ylinen *et al.*,  
1166 1995b).

1167 Although these signature patterns of extracellular events manifest as repeating motifs,  
1168 there are strong lines of theoretical and experimental evidence that they emerge from very  
1169 disparate structures. For instance, theta oscillations in the hippocampus have shown to be  
1170 afferent from two reciprocally connected subcortical nuclei that act as pacemakers, the medial  
1171 septum-diagonal band of Broca and the supramammillary region. Apart from these two  
1172 subcortical nuclei, inputs from entorhinal cortex and CA3 also play an important role in the  
1173 generation of theta oscillations in the hippocampus. Furthermore, theoretical modeling and *in*

1174 *in vitro* data also suggest that an intact hippocampus could sustain theta oscillations on its own in a  
1175 manner that is dependent on intra-hippocampal excitatory and inhibitory synaptic connections  
1176 (Buzsaki, 2002, 2006; Colgin, 2013, 2016; Goutagny *et al.*, 2009; Kamondi *et al.*, 1998; Traub *et*  
1177 *al.*, 1989). A similar analysis, in terms of disparate underlying sources and mechanisms, holds  
1178 for gamma frequency oscillations that are observed in the hippocampus as well (Buzsaki and  
1179 Wang, 2012; Colgin, 2016; Colgin and Moser, 2010; Csicsvari *et al.*, 2003; Wang, 2010; Wang  
1180 and Buzsaki, 1996). In addition, apart from synaptic contributions to the LFPs, it is now clear  
1181 that return transmembrane currents from sub- and supra-threshold somatodendritic ion channels  
1182 also alter the LFP in terms of their frequency content, amplitude and phase (Buzsaki *et al.*, 2012;  
1183 Einevoll *et al.*, 2013; Ness *et al.*, 2016; Reimann *et al.*, 2013; Schomburg *et al.*, 2012; Sinha and  
1184 Narayanan, 2015; Taxidis *et al.*, 2015). In addition, several mechanisms such ephaptic coupling,  
1185 heterogeneous extracellular resistivity, glial and axonal transmembrane mechanisms also  
1186 contribute and regulate local field potentials, resulting in a complexity that spans almost all  
1187 parameters of the local network (Anastassiou and Koch, 2015; Buzsaki *et al.*, 2012; Einevoll *et*  
1188 *al.*, 2013; Kajikawa and Schroeder, 2011; Katzner *et al.*, 2009; Linden *et al.*, 2011).

1189         From the complexity involved in the generation and regulation of hippocampal LFPs,  
1190 with several brain regions and several constitutive network components contributing to their  
1191 emergence, it is easy to discern that similar LFP patterns could be achieved through non-unique  
1192 combinations of disparate components. Irrespective of whether it is the manifestation of an  
1193 oscillatory pattern in a given frequency range (Buzsaki, 2002; Buzsaki and Wang, 2012; Colgin,  
1194 2013; Colgin and Moser, 2010; Csicsvari *et al.*, 2003), or the emergence of sharp wave ripples  
1195 (Buzsaki, 2015; English *et al.*, 2014; Taxidis *et al.*, 2015), or the emergence of resonance in the  
1196 LFP power spectral density (Ness *et al.*, 2016), or achieving a given phase of single-neuron

1197 firing with reference to an LFP oscillation (Sinha and Narayanan, 2015), the routes are several  
1198 and involve several disparate structural components. Thus, there is evidence for degeneracy in  
1199 the mechanisms that mediate and regulate local field potentials, implying that extreme caution  
1200 should be exercised in making one-to-one relationships between constitutive components and  
1201 specific aspects of LFP recordings (Anastassiou and Koch, 2015; Buzsaki *et al.*, 2012; Einevoll  
1202 *et al.*, 2013; Kajikawa and Schroeder, 2011; Katzner *et al.*, 2009; Linden *et al.*, 2011).

1203

### 1204 **3.9. Degeneracy in neural coding**

1205 A particularly thorny debate that has spanned decades is about the codes employed by neurons in  
1206 encoding their inputs. The crux of the debate has been about whether neurons encode  
1207 information in the rate of or in the precise timing of action potential firing (Buzsaki *et al.*, 2013;  
1208 Engel *et al.*, 2001; Engel and Singer, 2001; Fries *et al.*, 2007; Gallistel, 2017; Jaramillo and  
1209 Kempter, 2017; London *et al.*, 2010; Panzeri *et al.*, 2017; Shadlen and Newsome, 1994, 1995,  
1210 1998; Singer *et al.*, 1997; Softky, 1994; Softky, 1995). Arguments against temporal coding have  
1211 raised questions about the ability of neurons to perform millisecond-or-submillisecond  
1212 coincidence detection that is essential for decoding a temporal code, about the relevance of  
1213 precise timing in the face of noise and variability in neuronal responses to identical stimuli and  
1214 about the ability of neuronal networks to reliably propagate synchronous firing (London *et al.*,  
1215 2010; Panzeri *et al.*, 2017; Shadlen and Newsome, 1994, 1998). Counterarguments have relied  
1216 on the demonstration of millisecond-or-submillisecond coincidence detection in active dendritic  
1217 structures, on the dependence of synchrony propagation on neuronal intrinsic properties *and*  
1218 input structure and on the existence of temporally precise cell assemblies that could mitigate the  
1219 overall background noise in decoding the precise timing of inputs (Buzsaki, 2010; Buzsaki *et al.*,



1220 2013; Das and Narayanan, 2015, 2017; Diesmann *et al.*, 1999; Engel *et al.*, 2001; Engel and  
1221 Singer, 2001; Fries *et al.*, 2007; Golding and Oertel, 2012; Hong *et al.*, 2012; Pastalkova *et al.*,  
1222 2008; Reyes, 2003; Singer *et al.*, 1997; Softky, 1994).

1223         The expression of *coding* degeneracy in the cellular and network scales (Leonardo,  
1224 2005), in terms of the ability of disparate structural components to elicit similar input-output  
1225 characteristics, is clear from the lines of evidence presented earlier (Sec. 2.2). In addition,  
1226 employing electrophysiological recordings and computational models to assess subthreshold  
1227 resonance and spike triggered average (STA) of model neurons, it has been shown that  
1228 hippocampal pyramidal neurons are selective to different input features (including spectral  
1229 features and temporal coincidence of inputs) depending on the dendritic location of their inputs.  
1230 This location-dependent feature encoding is mediated by ion channel expression profiles, and  
1231 could be achieved through disparate combinations of different ion channel expression profiles  
1232 (Das and Narayanan, 2014, 2015, 2017; Das *et al.*, 2017; Narayanan and Johnston, 2007, 2012;  
1233 Rathour *et al.*, 2016; Rathour and Narayanan, 2012a, 2014). Given the well-established strong  
1234 relationship between STA and types of coding (Ratte *et al.*, 2013), this location-dependent  
1235 scenario argues for location-dependent forms of coding. Specifically, the soma and proximal  
1236 dendrites showing class I STA (integrator) and the distal dendrites manifesting class II STA  
1237 (coincidence detector) as a consequence of the differential expression of different channels (Das  
1238 and Narayanan, 2015). Therefore, it seems reasonable to postulate that the proximal and distal  
1239 regions are respectively geared towards rate and temporal coding, with this location-dependent  
1240 differential coding strategy extending to cortical and hippocampal neurons (Branco and Hausser,  
1241 2010, 2011; Das and Narayanan, 2015). Finally, behaviorally-driven neuromodulatory inputs and  
1242 activity-dependent plasticity could markedly alter the operating mode and the class of

1243 excitability of compartments of a single neuron, and the type of coding employed by a neuron is  
1244 dependent not just on its operating mode but also the specific characteristics of the input. Thus,  
1245 even from the perspective of encoding strategies *within* a single neuron, the arguments that pitch  
1246 rate coding *against* temporal coding are oversimplifying the complexity of neural encoding and  
1247 decoding. Instead, there are broad lines of evidence pointing to a hybrid rate/temporal coding  
1248 system that encompasses degeneracy by achieving encoding goals through disparate  
1249 combinations of several cellular and network components in a manner that is strongly dependent  
1250 on several spatiotemporal aspects of neuronal and behavioral state (Das and Narayanan, 2014,  
1251 2015; Das *et al.*, 2017; Diesmann *et al.*, 1999; Lee and Dan, 2012; Marder, 2012; Marder and  
1252 Thirumalai, 2002; Ratte *et al.*, 2013).

1253         With reference to neural codes for features of the external environment, the coding of  
1254 spatial location of animal in the hippocampus is an ideal instance of hybrid encoding schema that  
1255 expresses degeneracy. Unlike the argument for rate *vs.* temporal coding that seems to drive the  
1256 narrative otherwise (Buzsaki *et al.*, 2013; Engel *et al.*, 2001; Engel and Singer, 2001; Fries *et al.*,  
1257 2007; Gallistel, 2017; Jaramillo and Kempter, 2017; London *et al.*, 2010; Panzeri *et al.*, 2017;  
1258 Shadlen and Newsome, 1994, 1995, 1998; Singer *et al.*, 1997; Softky, 1994; Softky, 1995;  
1259 Srivastava *et al.*, 2017), hippocampal physiologists have concurred on the existence of  
1260 dual/hybrid encoding schema for place-specific encoding. Specifically, place cells in the  
1261 hippocampus elicit higher rates of firing when the animal enters a specific place field. In  
1262 conjunction, the phase of action potential firing of place cells with reference to the extracellular  
1263 theta rhythm also advances as a function of spatial location of the animal within the place field.  
1264 Thus, hippocampal place cells employ a dual code of firing rate *and* phase of firing (temporal  
1265 coding involving the precise timing of action potential firing) to represent spatial location of the

1266 animal (Ahmed and Mehta, 2009; Buzsaki and Moser, 2013; Derdikman and Moser, 2010;  
1267 Hartley *et al.*, 2014; Harvey *et al.*, 2009; Huxter *et al.*, 2003; Lisman, 2005; Lisman and Jensen,  
1268 2013; Mehta *et al.*, 2002; Moser *et al.*, 2008; Moser *et al.*, 2015; O'Keefe, 1976, 1979; O'Keefe  
1269 and Burgess, 1999, 2005; O'Keefe *et al.*, 1998; O'Keefe and Conway, 1978; O'Keefe and Recce,  
1270 1993; Skaggs *et al.*, 1996). In certain cases, it has been shown that the two coding schema act  
1271 independent of each other and could act as the fail-safe mechanisms for each other (Aghajian *et*  
1272 *al.*, 2015; Huxter *et al.*, 2003).

1273         Whereas these lines of evidence make a case for employing disparate coding schemas in  
1274 encoding the same input, the case for disparate mechanisms involved in encoding and  
1275 maintaining the rate and temporal codes is also strong. Specifically, the role of afferent synaptic  
1276 drive, local inhibition, several ion channels and receptors, dendritic spikes, spatiotemporal  
1277 interactions between somatodendritic channels and receptors, and plasticity in each of these  
1278 components have all been implicated in the emergence and maintenance of these codes (Bittner  
1279 *et al.*, 2015; Danielson *et al.*, 2016; Geisler *et al.*, 2010; Geisler *et al.*, 2007; Grienberger *et al.*,  
1280 2017; Harvey *et al.*, 2009; Lee *et al.*, 2012; Losonczy *et al.*, 2010; Magee, 2001; Nakashiba *et*  
1281 *al.*, 2008; Nakazawa *et al.*, 2004; Nolan *et al.*, 2004; Royer *et al.*, 2012; Sheffield and Dombeck,  
1282 2015; Skaggs *et al.*, 1996; Tsien *et al.*, 1996; Wills *et al.*, 2005). In addition, there are lines of  
1283 experimental evidence that suggest that subthreshold afferent synaptic inputs from several place  
1284 fields arrive onto a single place cell, and that a silent cell could be converted to a place cell for  
1285 *any* of these place fields by an appropriate plasticity-inducing stimulus (Bittner *et al.*, 2015; Lee  
1286 *et al.*, 2012), suggesting that disparate cells could achieve the same function of encoding a given  
1287 spatial location. The expression profiles of several channels and receptors control the overall  
1288 excitability of a neuron (Sec. 2.2), and there are several mechanisms that regulate the phase of

1289 intracellular voltage oscillations with reference to an external reference or to the overall afferent  
1290 current (Geisler *et al.*, 2010; Geisler *et al.*, 2007; Harvey *et al.*, 2009; Narayanan and Johnston,  
1291 2008; Rathour *et al.*, 2016; Rathour and Narayanan, 2012a, 2014; Sinha and Narayanan, 2015;  
1292 Skaggs *et al.*, 1996). Together, these studies point to the possibility that similar rate *and* phase  
1293 spatial codes in a neuron could be achieved through disparate combinations of constituent  
1294 components, and several neurons could encode for the same place field with distinct  
1295 combinations of these mechanisms. Future studies could further explore the manifestation of  
1296 degeneracy in spatial coding in the hippocampus, focusing on the hybrid code involving rate as  
1297 well as phase encoding of input features.

1298

### 1299 **3.10. Degeneracy in learning and memory**

1300 Behavior emerges as a consequence of coordinated activity of multiple brain regions in  
1301 conjunction with sensory and motor systems (Bennett and Hacker, 2003; Jazayeri and Afraz,  
1302 2017; Krakauer *et al.*, 2017; Tytell *et al.*, 2011; Vetere *et al.*, 2017). The hippocampus has been  
1303 implicated in several forms of spatial and non-spatial learning, with strong links to episodic  
1304 memory (Anderson *et al.*, 2007; Bird and Burgess, 2008; Bliss and Collingridge, 1993; Bunsey  
1305 and Eichenbaum, 1996; Lynch, 2004; Marr, 1971; Martin *et al.*, 2000; Martinez and Derrick,  
1306 1996; Mayford *et al.*, 2012; Morris, 1989; Morris *et al.*, 1986; Morris *et al.*, 1982; Moser *et al.*,  
1307 2015; Nakazawa *et al.*, 2004; Neves *et al.*, 2008a; Rajasethupathy *et al.*, 2015; Scoville and  
1308 Milner, 1957; Squire *et al.*, 2004; Whitlock *et al.*, 2006).

1309         The quest for *the* mechanistic basis for learning and memory in the hippocampus has  
1310 spanned several decades, especially since the strong links between the hippocampal lesions and  
1311 specific forms of memory were established (Scoville and Milner, 1957). This quest has spanned

1312 several scales of analysis, with efforts to link specific genes, receptors, channels and forms of  
1313 cellular plasticity to learning and memory. Several studies have assessed the link between  
1314 specific behavioral tasks and cellular/molecular substrates through targeted pharmacological  
1315 blockades or genetic manipulations. The existence of divergent and numerous cellular/molecular  
1316 components that impair *specific* learning tasks have been unveiled by these efforts, revealing  
1317 considerable complexity in the plasticity networks and systems biology of learning and memory.  
1318 As is evident from this complexity and associated animal-to-animal and cell-to-cell variability,  
1319 which involves the ensemble of mechanisms and interactions discussed above not just from  
1320 within the hippocampus but also from other brain regions, demonstrating causality with  
1321 reference to learning and memory and *any one specific form of plasticity or cellular/molecular*  
1322 *substrate*, has proven extremely challenging (Andersen *et al.*, 2006; Bennett and Hacker, 2003;  
1323 Bhalla, 2014; Bhalla and Iyengar, 1999; Bliss and Collingridge, 1993; Collingridge and Bliss,  
1324 1987; Jazayeri and Afraz, 2017; Kandel, 2001; Kandel *et al.*, 2014; Kim and Linden, 2007;  
1325 Kotaleski and Blackwell, 2010; Krakauer *et al.*, 2017; Lynch, 2004; Manninen *et al.*, 2010;  
1326 Martin *et al.*, 2000; Martinez and Derrick, 1996; Mayford *et al.*, 2012; Mozzachiodi and Byrne,  
1327 2010; Neves *et al.*, 2008a; Zhang and Linden, 2003).

1328         The complexities of the networks that are involved in learning and memory are only  
1329 compounded by the many-to-many mappings that are observed between behavioral observations  
1330 and molecular/cellular components, the joint occurrence of several forms of plasticity with the  
1331 *same* protocols (Sec. 3.6), the concurrent impairments in different forms of plasticity by  
1332 blockade of the *same* signaling cascades (Sec. 3.6), the dissociations between different learning  
1333 tasks and the compensatory mechanisms that are associated with the knockout of specific genes  
1334 (Bailey *et al.*, 2006; Jazayeri and Afraz, 2017; Krakauer *et al.*, 2017; Mayford *et al.*, 2012;

1335 Tsokas *et al.*, 2016). For instance, the knock out of GluA1 (also referred to as GluR1 or GluRA),  
1336 an AMPAR subunit that is important for expression of certain forms of synaptic plasticity,  
1337 impaired only some forms of synaptic plasticity and not others at the cellular scale of analysis  
1338 (Hoffman *et al.*, 2002; Phillips *et al.*, 2008; Zamanillo *et al.*, 1999). Similarly, at the behavioral  
1339 level, although behavioral deficits were observed in certain learning tasks in GluA1 knockout  
1340 mice, the knock out did not alter behavior in other learning tasks (Reisel *et al.*, 2002; Zamanillo  
1341 *et al.*, 1999). Several examples of such dissociations are reviewed in (Mayford *et al.*, 2012),  
1342 further emphasizing the difficulty in assigning a causal link between learning and memory and  
1343 *any one specific form of plasticity or cellular/molecular substrate*.

1344         Although this parametric and interactional complexity might seem exasperating if the  
1345 goal is to pinpoint *the* cellular/molecular component that is involved in hippocampal-dependent  
1346 learning and memory, it is an extremely useful substrate for the effective expression of  
1347 degeneracy in achieving the goal of robust learning and memory. The ability to achieve very  
1348 similar learning indices through multiple routes involving disparate forms of plasticity in several  
1349 constitutive components tremendously increases the ability of the system to achieve robust  
1350 learning. As a consequence of the several forms of variability and state-dependence exhibited by  
1351 the learning system, in terms of the underlying components, their plasticity and combinatorial  
1352 interactions, it is possible that some of these disparate routes may not involve specific  
1353 cellular/molecular components or forms of plasticity in the process of achieving certain learning  
1354 goals. This also implies animal-to-animal and trial-to-trial variability in the mechanisms that  
1355 mediate learning, thereby calling for utmost caution in assigning one-to-one relationships  
1356 between behavioral learning and specific forms of plasticity in any single brain region (Bailey *et*  
1357 *al.*, 2006; Bennett and Hacker, 2003; Jazayeri and Afraz, 2017; Krakauer *et al.*, 2017; Mayford

1358 *et al.*, 2012; O'Leary and Marder, 2014; Sieling *et al.*, 2014; Tsokas *et al.*, 2016; Vogelstein *et*  
1359 *al.*, 2014).

#### 1360 **4. The causality conundrum**

1361 It is clear from the analyses above that theoretical and experimental evidence exist for: (a)  
1362 several disparate combinations of distinct constitutive components elicit analogous function; (b)  
1363 there are forms of animal-to-animal (channel-to-channel, neuron-to-neuron, network-to-network,  
1364 etc.) variability in terms of the contributions of specific constitutive components that mediate  
1365 similar function; and (c) the components that mediate similar function, and their relative  
1366 contributions to the emergence of this function are state-dependent, and could undergo  
1367 experience-dependent plasticity (towards maintaining robustness of that function or towards  
1368 learning-dependent alteration of function). Juxtaposed against these observations is the question  
1369 on whether it is even possible to exclusively assign causal one-to-one relationships between  
1370 function and specific constitutive components. Evidence for the existence of degeneracy,  
1371 variability and adaptability have made us acutely aware of the possibility that we could be  
1372 committing mereological fallacies (Bennett and Hacker, 2003; Varzi, 2016), whereby we assign  
1373 specific behavioral roles to parts of the animal's brain or to plasticity therein (Bailey *et al.*, 2006;  
1374 Jazayeri and Afraz, 2017; Krakauer *et al.*, 2017; Mayford *et al.*, 2012; O'Leary and Marder,  
1375 2014; Sieling *et al.*, 2014; Tsokas *et al.*, 2016; Vogelstein *et al.*, 2014).

#### 1376 **4.1. Inevitable flaws in an experimental plan to establish causality that leaps across** 1377 **multiple scales**

1378 Let us chart a hypothetical experimental plan where we are interested in demonstrating that a  
1379 specific form of learning behavior is dependent on plasticity in one specific component (let's say

1380 component X) in a brain region of our choice (let's say hippocampus). We first measure *in vivo*  
1381 plasticity in component X along with its time course, and let us say that we find a prominent  
1382 correlation between this time course and the time course of behavioral learning. Next, we  
1383 introduce an established blocker of plasticity in component X specifically into the hippocampus,  
1384 and find that this blocks both the plasticity in component X *in vivo* and impairs learning. We  
1385 repeat similar experiments with (a) an established pharmacological blocker of component X  
1386 infused into the hippocampus; (b) transgenic manipulations that take out component X  
1387 completely in the hippocampus; (c) a pharmacological blocker that leaves component X intact,  
1388 but impairs its plasticity by blocking a mechanism that induces plasticity in component X; and  
1389 (d) genetic knockout of mechanisms that mediates plasticity in component X. Let's say that  
1390 learning was impaired in all four cases, and there was no plasticity in component X in the last  
1391 two cases (in the first two cases component X was completely abolished). As a final nail in the  
1392 hypothesis to link plasticity in hippocampal component X to the specific learning behavior, we  
1393 artificially alter component X and consequently find behavioral signatures related to the learning  
1394 process. Therefore, we have shown that component X and its plasticity are necessary and  
1395 sufficient for the specific learning behavior. This experimental plan is broadly similar to that  
1396 proposed by (Stevens, 1998) to test the hypothesis that auditory synapses in the amygdala  
1397 become strengthened by LTP during behavioral training that attaches "fear" to the tone, and that  
1398 the memory of the tone as a fear-producing stimulus resides in the strength of the synapses from  
1399 the auditory thalamus (Stevens, 1998):

1400 "How could this idea be tested? It should be that (1) blocking LTP prevents fear learning;  
1401 (2) the sensory pathways from the thalamus and cortex to the amygdala are capable of  
1402 LTP; (3) auditory fear conditioning increases the amygdala's postsynaptic response to the  
1403 tone, and these increases are prevented by blocking LTP pharmacologically or in another  
1404 way; and (4) inducing LTP in the thalamoamygdaloid pathway attaches "fear" to  
1405 appropriate sensory stimuli."



1406  
1407           Although this experimental plan has shown that component X and its plasticity are  
1408 necessary and sufficient for the specific learning behavior, given the complexity that we have  
1409 elucidated thus far, this experimental design *does not* provide a causal link between component  
1410 X or its plasticity with behavior. First, we were so focused on component X that we implicitly  
1411 precluded the change of any other component either in the hippocampus or in other brain region.  
1412 Given the rich complexity in the distinct components, their plasticity and interactions among  
1413 them, it is infeasible that only component X in the hippocampus was changing in response to the  
1414 behavioral stimulus. It is now well established that several cellular components change in  
1415 response to the same calcium signal or the activation of the same signaling cascade, and there are  
1416 several parallel homeostasis mechanisms that also exhibit degeneracy. This implies that altering  
1417 component X in the hippocampus *without* altering anything else across the brain is highly  
1418 unlikely. Therefore, if we had performed the same set of experiments on another component Y,  
1419 we might have arrived at similar conclusions (including correlated time courses). In other words,  
1420 it is important not to interpret measurement correlations as evidence for causation, and to  
1421 understand that absence of measurements in other forms of plasticity or plasticity in other brain  
1422 regions does not mean they don't coexist with the form of plasticity that we are focused on.

1423           Second, when we blocked plasticity in component X, given the complexities elucidated  
1424 above, it is highly unlikely that we *specifically* blocked plasticity in component X without  
1425 disturbing plasticity in any other measurement or without introducing metaplasticity in some  
1426 other form of plasticity (Sec. 3.6–3.7). For instance, from a cellular perspective, theta burst  
1427 pairing results in plasticity of synaptic strength and of HCN, A-type K<sup>+</sup> and SK channels, and  
1428 pharmacologically blocking NMDAR receptors impairs plasticity not just in one of them, but in  
1429 *all* of them (Fan *et al.*, 2005; Frick *et al.*, 2004; Lin *et al.*, 2008; Losonczy *et al.*, 2008). Thus if

1430 we had observed impairment of plasticity in only one of these components, we would have  
1431 wrongly concluded that to be the only component that changes with TBP. Returning to our  
1432 experimental plan on the role of component X, there could several other secondary and  
1433 unintended effects of blocking plasticity in component X that spans the hippocampus and other  
1434 brain regions (Bhalla, 2014; Jazayeri and Afraz, 2017; Kotaleski and Blackwell, 2010; Krakauer  
1435 *et al.*, 2017; Otchy *et al.*, 2015). Thus, it is prudent not to dismiss absence of measurements as  
1436 absence of evidence for other components.

1437         Third, when we performed the experiment of artificially altering component X, it is  
1438 obvious that it is highly unlikely that we achieved this without disturbing any other component in  
1439 some brain region or without introducing metaplasticity in some form of plasticity. Therefore,  
1440 the alternate interpretations of our observations (other than the “linear narrative” that concludes  
1441 “plasticity in hippocampal component X mediates learning behavior”) are innumerable given the  
1442 staggering complexity of the underlying system and the degeneracy involved in accomplishing  
1443 the learning task. Ruling out *all these* alternate interpretations is essential for convergence to the  
1444 linear narrative, but is rather impossible because measurements of all constitutive components in  
1445 all brain regions is currently infeasible. From a nonlinear dynamical system perspective  
1446 (Guckenheimer and Holmes, 1983; Nayfeh and Balachandran, 1995; Strogatz, 2014), our “linear  
1447 narrative” and the associated inference are equivalent to declaring a component to be critically  
1448 important for system performance because perturbation to that one component, — which is part  
1449 of a high-dimensional, adaptive, non-linear dynamical system with strong coupling across  
1450 dimensions, — collapses the system. Additionally, especially given the expression of  
1451 degeneracy, in our artificial perturbation experiment, we showed that the system *could* perform a  
1452 specific behavior when we introduced a perturbation to component X. However, this observation

1453 does not necessarily imply that the system *does* employ a similar perturbation to component X to  
1454 elicit the same behavior under normal ethological conditions (Adamantidis *et al.*, 2015). Given  
1455 the degeneracy framework, it is important to appreciate that the existence of *a* solution neither  
1456 implies its uniqueness nor does it ensure that the solution is employed by the physiological  
1457 system under standard ethological conditions.

#### 1458 **4.2. Degeneracy: The way forward**

1459 It is important to distinguish between understanding functionality that emerges through  
1460 interactions between components in an adjacent scale and efforts aimed at causality that leaps  
1461 across multiple scales. It is clear that assessing interactions between constitutive components in  
1462 the emergence of function in an adjacent scale have provided invaluable insights in neuroscience.  
1463 As an example, the question on how different ionic currents at the molecular scale interact to  
1464 result in the emergence of an action potential in the cellular scale (Hodgkin and Huxley, 1952)  
1465 has revolutionized several aspects of neuroscience over the past several decades. Even within the  
1466 framework of degeneracy, the question on whether and how different combinations of disparate  
1467 combinations of parameters in a give scale could result in similar functionality in an adjacent  
1468 scale have provided deep insights into how the nervous system might be solving the robustness  
1469 problem in the face of variability (Anirudhan and Narayanan, 2015; Dhawale *et al.*, 2017; Foster  
1470 *et al.*, 1993; Gjorgjieva *et al.*, 2016; Goldman *et al.*, 2001; Katz, 2016; Marder, 2011; Marder  
1471 and Goaillard, 2006; Marder *et al.*, 2015; Marder and Taylor, 2011; Mukunda and Narayanan,  
1472 2017; O'Leary and Marder, 2014; Prinz *et al.*, 2004; Rathour and Narayanan, 2012a, 2014;  
1473 Taylor *et al.*, 2009).

1474 However, causal leaps beyond a single scale of analysis should be treated with extreme  
1475 caution. For instance, approaches assuming a unique reductionist solution for a behavioral

1476 observation will invariably end up in apparently contradictory conclusions about *the* mechanism  
1477 that mediates behavior. Prominent among the several reasons that result in these apparent  
1478 contradictions — such as adaptive compensations and animal-to-animal variability — is inherent  
1479 degeneracy, where disparate combinations of components could result in identical behavior in a  
1480 manner that is dependent on several factors, including behavioral state. The flaws that emerge in  
1481 an experimental plan to establish causality that leaps multiple scales in a nonlinear dynamical  
1482 system that expresses degeneracy are obvious from the analysis presented above. Here, it is  
1483 critical to ask the impossible question on whether we are sure that *nothing else* has changed in  
1484 neurons (and other cells) of the same brain region or the other, which could be  
1485 mediating/contributing to the observed behavioral changes *before* declaring a causal one-to-one  
1486 relationship between a molecular/cellular component and behavior.

1487         This is especially important because there are several properties that *emerge* at each jump  
1488 along the multiscale axis of neuroscience (Fig. 1A), and leaps across multiple scales (like genes  
1489 to behavior) traverses several *emergent* properties owing to innumerable nonlinear processes that  
1490 exhibit degeneracy. This yields a system that is intractable even at the scale where the  
1491 perturbations were introduced because of the complex feedback loops spanning several scales  
1492 that mediate homeostasis and adaptation. Consequently, the outcomes of any perturbation at any  
1493 scale are critically dependent on several components across scales, the nature of interactions of  
1494 these components with the perturbation and importantly on the adaptation that is triggered by the  
1495 perturbation in all these components across scales. Therefore, extreme caution should be  
1496 exercised in assigning causal one-to-one relationship between components (or manifolds) that  
1497 are several scales apart along the multi-scale axis (Bennett and Hacker, 2003; Jazayeri and Afraz,  
1498 2017; Krakauer *et al.*, 2017; Otchy *et al.*, 2015).

1499           Together, while degeneracy is an invaluable asset to evolution, physiology and behavior  
1500 in achieving robust functions through several degrees of freedom, it makes the resultant complex  
1501 system rather intractable. This intractability makes it nearly impossible to achieve the goals of  
1502 reductionism, where the pursuit has largely been for causal one-to-one relationships that leap  
1503 across several scales. Several thorny debates in the field about apparent contradictions involving  
1504 different components mediating the same function could be put to rest if this requirement of one-  
1505 to-one relationships is relaxed. Specifically, the ubiquitous expression of degeneracy spanning  
1506 multiple scales offers an ideal reconciliation to these controversies, through the recognition that  
1507 the distinct routes to achieve a functional goal are not necessarily contradictory to each other, but  
1508 are alternate routes that the system might recruit towards accomplishment of the goal. The  
1509 intense drive to make leaps across multiple scales to establish unique one-to-one relationships  
1510 should instead be replaced by a steadfast recognition for degeneracy as an essential component in  
1511 physiology, behavior and evolution. This recognition, apart from precluding one-to-one  
1512 relationships, would provide clear warnings in assigning causal relationships that leap across  
1513 multiple scales and multiple emergent properties. Importantly, this recognition would pave the  
1514 way for a strong focus on integrative and holistic treatises to neuroscience and behavior,  
1515 arguments for which have only been growing over the years (Bennett and Hacker, 2003;  
1516 Edelman and Gally, 2001; Jazayeri and Afraz, 2017; Krakauer *et al.*, 2017; Tononi and Edelman,  
1517 1998; Tononi *et al.*, 1998; Tononi *et al.*, 1994; Tytell *et al.*, 2011). Future approaches should  
1518 recognize that behavior emerges from disparate combinations of tightly cross-coupled multi-  
1519 scale emergent properties, each diverging and converging at each scale of analysis through  
1520 degeneracy spanning complex parametric and interactional spaces. Large-scale databases related  
1521 to neuronal morphology, models and physiology — such as the Allen brain atlas (Sunkin *et al.*,

1522 2013), ICGenealogy (Podlaski *et al.*, 2017), Channelpedia (Ranjan *et al.*, 2011), Neuromorpho  
1523 (Ascoli *et al.*, 2007), ModelDB (Hines *et al.*, 2004) and Neuroelectro (Tripathy *et al.*, 2014) —  
1524 provide ideal tools for such analyses involving large parametric spaces, and could provide  
1525 critical insights about the role of degeneracy in the emergence of robust brain physiology and its  
1526 links to behavior.

## 1527 **5. Conclusions**

1528 In this review, we systematically presented lines of evidence for the ubiquitous expression of  
1529 degeneracy spanning several scales of the mammalian hippocampus. We argued that the  
1530 framework of degeneracy in an encoding system shouldn't be viewed from the limited  
1531 perspective of maintaining homeostasis, but should be assessed from the perspective of  
1532 achieving the twin goals of encoding information and maintaining homeostasis. Within the broad  
1533 framework of degeneracy, it is extremely important that future studies focus on the fundamental  
1534 questions on (i) how does the brain change its constituent components towards encoding new  
1535 information without jeopardizing homeostasis?; and (ii) how do homeostatic mechanisms  
1536 maintain robust function without affecting learning-induced changes in the brain? Without an  
1537 effective answer to this overall question on concomitant learning and homeostasis in the face of  
1538 staggeringly combinatorial complexity, our understanding of the nervous system in terms of its  
1539 ability to systematically adapt to the environment will remain incomplete. Although the core  
1540 conclusions on degeneracy reviewed and analyzed here would extend to other mammalian brain  
1541 regions and functions that they have been implicated in encoding processes, this extrapolation  
1542 should be preceded by careful assessment of the specifics associated with the constitutive  
1543 components and specific interactions there. Additionally, although our focus here was on  
1544 encoding, homeostasis and physiology, it is important that future studies also assess the  
1545 implications for degeneracy in the emergence of pathological conditions (Edelman and Gally,  
1546 2001; O'Leary *et al.*, 2014).

1547 Finally, returning to the distinction between the “structure defines function” and the  
1548 “form follows function” perspectives, it seems like the distinction also seemingly extends to the  
1549 methodology that is deemed appropriate for assessing neuronal systems. At one end, a strong  
1550 emphasis is placed on the requirement for an experimental approach (Buzsaki, 2006):

1551 “The complexity and precision of brain wiring make an experimental approach  
1552 absolutely necessary. No amount of introspection or algorithmic modeling can help  
1553 without parallel empirical exploration.”  
1554

1555 At the other end, the emphasis, reflecting Richard Feymann’s quote “What I cannot create, I do  
1556 not understand”, is on *in silico* approaches (Sakmann, 2017):

1557 “At present however, it seems that “What we cannot reconstruct *in silico* and model  
1558 we have not understood”.”  
1559

1560 Within the degeneracy framework, however, it is starkly evident from existing literature  
1561 reviewed here that a holistic combination of computational and experimental techniques is  
1562 indispensable towards understanding structure-function relationships and the associated  
1563 complexities (Das *et al.*, 2017; Edelman and Gally, 2001; Foster *et al.*, 1993; Marder, 1998,  
1564 2011; Marder and Goaillard, 2006; Marder and Taylor, 2011; Rathour *et al.*, 2016; Rathour and  
1565 Narayanan, 2012a, b, 2014; Sporns *et al.*, 2000; Tononi and Edelman, 1998; Tononi *et al.*, 1998;  
1566 Tononi *et al.*, 1994, 1996, 1999).

1567 Emphasizing the strong links between biology and evolution, Theodosius Dobzhansky  
1568 had written “nothing in biology makes sense except in the light of evolution” (Dobzhansky,  
1569 1973). Given the ubiquitous prevalence of degeneracy and its strong links to evolution (Edelman  
1570 and Gally, 2001), it is perhaps apt to add a corollary to this quote and state “nothing in  
1571 physiology makes sense except in the light of degeneracy”.

1572

1573 **ACKNOWLEDGMENTS**

1574

1575 We thank Dr. Peter Jedlicka, Dr. Manisha Sinha and members of the cellular neurophysiology  
1576 laboratory for useful discussions and for thoughtful comments on a draft of this manuscript.

1577 Work reviewed here was supported by the Wellcome Trust-DBT India Alliance (Senior  
1578 fellowship to RN: IA/S/16/2/502727), Human Frontier Science Program (HFSP) Organization  
1579 (RN), the Department of Biotechnology (RN), the Department of Science and Technology (RN)  
1580 and the Ministry of Human Resource Development, India (RKR and RN).

1581



## 1582 REFERENCES

- 1583  
1584 Abbott, L. F. (2003) Balancing homeostasis and learning in neural circuits. *Zoology (Jena)* **106**, 365-371.  
1585 Abbott, L. F. and LeMasson, G. (1993) Analysis of Neuron Models with Dynamically Regulated Conductances.  
1586 *Neural Comput* **5**, 823-842.  
1587 Abbott, L. F. and Nelson, S. B. (2000) Synaptic plasticity: taming the beast. *Nat Neurosci* **3 Suppl**, 1178-1183.  
1588 Abbott, L. F. and Regehr, W. G. (2004) Synaptic computation. *Nature* **431**, 796-803.  
1589 Abraham, W. C. (2008) Metaplasticity: tuning synapses and networks for plasticity. *Nature reviews*.  
1590 *Neuroscience* **9**, 387.  
1591 Abraham, W. C. and Bear, M. F. (1996) Metaplasticity: the plasticity of synaptic plasticity. *Trends Neurosci* **19**,  
1592 126-130.  
1593 Abraham, W. C., Mason-Parker, S. E., Bear, M. F., Webb, S. and Tate, W. P. (2001) Heterosynaptic metaplasticity  
1594 in the hippocampus in vivo: a BCM-like modifiable threshold for LTP. *Proc Natl Acad Sci U S A* **98**,  
1595 10924-10929.  
1596 Abraham, W. C. and Robins, A. (2005) Memory retention--the synaptic stability versus plasticity dilemma.  
1597 *Trends Neurosci* **28**, 73-78.  
1598 Abraham, W. C. and Tate, W. P. (1997) Metaplasticity: a new vista across the field of synaptic plasticity.  
1599 *Progress in neurobiology* **52**, 303-323.  
1600 Achard, P. and De Schutter, E. (2006) Complex parameter landscape for a complex neuron model. *PLoS*  
1601 *computational biology* **2**, e94.  
1602 Adamantidis, A., Arber, S., Bains, J. S., Bamberg, E., Bonci, A., Buzsaki, G., Cardin, J. A., Costa, R. M., Dan, Y., Goda,  
1603 Y., Graybiel, A. M., Hausser, M., Hegemann, P., Huguenard, J. R., Insel, T. R., Janak, P. H., Johnston, D.,  
1604 Josselyn, S. A., Koch, C., Kreitzer, A. C., Luscher, C., Malenka, R. C., Miesenbock, G., Nagel, G., Roska, B.,  
1605 Schnitzer, M. J., Shenoy, K. V., Soltesz, I., Sternson, S. M., Tsien, R. W., Tsien, R. Y., Turrigiano, G. G., Tye,  
1606 K. M. and Wilson, R. I. (2015) Optogenetics: 10 years after ChR2 in neurons--views from the  
1607 community. *Nat Neurosci* **18**, 1202-1212.  
1608 Adelman, J. P., Maylie, J. and Sah, P. (2012) Small-conductance Ca<sup>2+</sup>-activated K<sup>+</sup> channels: form and function.  
1609 *Annual review of physiology* **74**, 245-269.  
1610 Aghajan, Z. M., Acharya, L., Moore, J. J., Cushman, J. D., Vuong, C. and Mehta, M. R. (2015) Impaired spatial  
1611 selectivity and intact phase precession in two-dimensional virtual reality. *Nat Neurosci* **18**, 121-128.  
1612 Ahmed, O. J. and Mehta, M. R. (2009) The hippocampal rate code: anatomy, physiology and theory. *Trends*  
1613 *Neurosci* **32**, 329-338.  
1614 Albantakis, L., Hintze, A., Koch, C., Adami, C. and Tononi, G. (2014) Evolution of integrated causal structures in  
1615 animats exposed to environments of increasing complexity. *PLoS computational biology* **10**,  
1616 e1003966.  
1617 Alberini, C. M. (2009) Transcription factors in long-term memory and synaptic plasticity. *Physiol Rev* **89**, 121-  
1618 145.  
1619 Allen, N. J. and Barres, B. A. (2005) Signaling between glia and neurons: focus on synaptic plasticity. *Current*  
1620 *opinion in neurobiology* **15**, 542-548.  
1621 Allen, N. J. and Barres, B. A. (2009) Neuroscience: Glia - more than just brain glue. *Nature* **457**, 675-677.  
1622 Amarillo, Y., De Santiago-Castillo, J. A., Dougherty, K., Maffie, J., Kwon, E., Covarrubias, M. and Rudy, B. (2008)  
1623 Ternary Kv4.2 channels recapitulate voltage-dependent inactivation kinetics of A-type K<sup>+</sup> channels in  
1624 cerebellar granule neurons. *J Physiol* **586**, 2093-2106.  
1625 Anastassiou, C. A. and Koch, C. (2015) Ephaptic coupling to endogenous electric field activity: why bother?  
1626 *Current opinion in neurobiology* **31**, 95-103.  
1627 Andersen, P., Morris, R., Amaral, D., Bliss, T. and O'Keefe, J. (2006) *The hippocampus book*. Oxford University  
1628 Press: New York, USA.  
1629 Anderson, D., Mehaffey, W. H., Iftinca, M., Rehak, R., Engbers, J. D., Hameed, S., Zamponi, G. W. and Turner, R.  
1630 W. (2010) Regulation of neuronal activity by Cav3-Kv4 channel signaling complexes. *Nat Neurosci* **13**,  
1631 333-337.  
1632 Anderson, P., Morris, R., Amaral, D., Bliss, T. V. and O'Keefe, J. (2007) *The Hippocampus Book*. Oxford  
1633 University Press.  
1634 Anderson P, M. R., Amaral D, Bliss T, O'Keefe J (2007) *The Hippocampus Book*. Oxford University Press:  
1635 NewYork.

- 1636 Andrasfalvy, B. K. and Magee, J. C. (2001) Distance-dependent increase in AMPA receptor number in the  
1637 dendrites of adult hippocampal CA1 pyramidal neurons. *J Neurosci* **21**, 9151-9159.
- 1638 Andrasfalvy, B. K. and Mody, I. (2006) Differences between the scaling of miniature IPSCs and EPSCs recorded  
1639 in the dendrites of CA1 mouse pyramidal neurons. *J Physiol* **576**, 191-196.
- 1640 Anirudhan, A. and Narayanan, R. (2015) Analogous synaptic plasticity profiles emerge from disparate channel  
1641 combinations. *J Neurosci* **35**, 4691-4705.
- 1642 Araque, A. (2008) Astrocytes process synaptic information. *Neuron glia biology* **4**, 3-10.
- 1643 Araque, A., Carmignoto, G., Haydon, P. G., Oliet, S. H., Robitaille, R. and Volterra, A. (2014) Gliotransmitters  
1644 travel in time and space. *Neuron* **81**, 728-739.
- 1645 Araque, A., Parpura, V., Sanzgiri, R. P. and Haydon, P. G. (1999) Tripartite synapses: glia, the unacknowledged  
1646 partner. *Trends Neurosci* **22**, 208-215.
- 1647 Armstrong, C. M. and Bezanilla, F. (1974) Charge movement associated with the opening and closing of the  
1648 activation gates of the Na channels. *The Journal of general physiology* **63**, 533-552.
- 1649 Ascoli, G. A., Donohue, D. E. and Halavi, M. (2007) NeuroMorpho.Org: a central resource for neuronal  
1650 morphologies. *J Neurosci* **27**, 9247-9251.
- 1651 Ashhad, S., Johnston, D. and Narayanan, R. (2015) Activation of InsP3 receptors is sufficient for inducing  
1652 graded intrinsic plasticity in rat hippocampal pyramidal neurons. *Journal of neurophysiology* **113**,  
1653 2002-2013.
- 1654 Ashhad, S. and Narayanan, R. (2013) Quantitative interactions between the A-type K<sup>+</sup> current and inositol  
1655 trisphosphate receptors regulate intraneuronal Ca<sup>2+</sup> waves and synaptic plasticity. *J Physiol* **591**,  
1656 1645-1669.
- 1657 Ashhad, S. and Narayanan, R. (2016) Active dendrites regulate the impact of gliotransmission on rat  
1658 hippocampal pyramidal neurons. *Proc Natl Acad Sci U S A* **113**, E3280-3289.
- 1659 Attardo, A., Fitzgerald, J. E. and Schnitzer, M. J. (2015) Impermanence of dendritic spines in live adult CA1  
1660 hippocampus. *Nature* **523**, 592-596.
- 1661 Atwood, B. K., Lovinger, D. M. and Mathur, B. N. (2014) Presynaptic long-term depression mediated by Gi/o-  
1662 coupled receptors. *Trends Neurosci* **37**, 663-673.
- 1663 Augustine, G. J., Santamaria, F. and Tanaka, K. (2003) Local calcium signaling in neurons. *Neuron* **40**, 331-346.
- 1664 Baba, A., Yasui, T., Fujisawa, S., Yamada, R. X., Yamada, M. K., Nishiyama, N., Matsuki, N. and Ikegaya, Y. (2003)  
1665 Activity-evoked capacitative Ca<sup>2+</sup> entry: implications in synaptic plasticity. *J Neurosci* **23**, 7737-7741.
- 1666 Bading, H., Ginty, D. D. and Greenberg, M. E. (1993) Regulation of gene expression in hippocampal neurons by  
1667 distinct calcium signaling pathways. *Science* **260**, 181-186.
- 1668 Bailey, K. R., Rustay, N. R. and Crawley, J. N. (2006) Behavioral phenotyping of transgenic and knockout mice:  
1669 practical concerns and potential pitfalls. *ILAR journal* **47**, 124-131.
- 1670 Balch, W. E., Morimoto, R. I., Dillin, A. and Kelly, J. W. (2008) Adapting proteostasis for disease intervention.  
1671 *Science* **319**, 916-919.
- 1672 Bargmann, C. I. and Marder, E. (2013) From the connectome to brain function. *Nat Methods* **10**, 483-490.
- 1673 Barnard, E. A., Skolnick, P., Olsen, R. W., Mohler, H., Sieghart, W., Biggio, G., Braestrup, C., Bateson, A. N. and  
1674 Langer, S. Z. (1998) International Union of Pharmacology. XV. Subtypes of gamma-aminobutyric  
1675 acidA receptors: classification on the basis of subunit structure and receptor function.  
1676 *Pharmacological reviews* **50**, 291-313.
- 1677 Basu, J., Zaremba, J. D., Cheung, S. K., Hitti, F. L., Zemelman, B. V., Losonczy, A. and Siegelbaum, S. A. (2016)  
1678 Gating of hippocampal activity, plasticity, and memory by entorhinal cortex long-range inhibition.  
1679 *Science* **351**, aaa5694.
- 1680 Baumann, N. and Pham-Dinh, D. (2001) Biology of oligodendrocyte and myelin in the mammalian central  
1681 nervous system. *Physiol Rev* **81**, 871-927.
- 1682 Bazargani, N. and Attwell, D. (2016) Astrocyte calcium signaling: the third wave. *Nat Neurosci* **19**, 182-189.
- 1683 Bear, M. F. (2003) Bidirectional synaptic plasticity: from theory to reality. *Philos Trans R Soc Lond B Biol Sci*  
1684 **358**, 649-655.
- 1685 Bear, M. F., Cooper, L. N. and Ebner, F. F. (1987) A physiological basis for a theory of synapse modification.  
1686 *Science* **237**, 42-48.
- 1687 Beck, H. and Yaari, Y. (2008) Plasticity of intrinsic neuronal properties in CNS disorders. *Nature reviews*.  
1688 *Neuroscience* **9**, 357-369.
- 1689 Bellman, R. E. (1957) *Dynamic programming*. Princeton University Press: Princeton, NJ.

- 1690 Bennett, M. R. and Hacker, P. M. S. (2003) *Philosophical Foundations of Neuroscience*. Wiley-Blackwell: Malden,  
1691 MA.
- 1692 Bernard, C., Shah, M. and Johnston, D. (2007) Dendrites and disease. In: *Dendrites*. Eds. G. Stuart, N. Spruston,  
1693 M. Hausser. Oxford University Press.
- 1694 Berridge, M. J. (1998) Neuronal calcium signaling. *Neuron* **21**, 13-26.
- 1695 Berridge, M. J. (2002) The endoplasmic reticulum: a multifunctional signaling organelle. *Cell Calcium* **32**, 235-  
1696 249.
- 1697 Berridge, M. J. (2006) Calcium microdomains: organization and function. *Cell Calcium* **40**, 405-412.
- 1698 Berridge, M. J., Lipp, P. and Bootman, M. D. (2000) The versatility and universality of calcium signalling. *Nat*  
1699 *Rev Mol Cell Biol* **1**, 11-21.
- 1700 Bhalla, U. S. (2014) Multiscale modeling and synaptic plasticity. *Progress in molecular biology and*  
1701 *translational science* **123**, 351-386.
- 1702 Bhalla, U. S. and Iyengar, R. (1999) Emergent properties of networks of biological signaling pathways. *Science*  
1703 **283**, 381-387.
- 1704 Bi, G. Q. and Poo, M. M. (1998) Synaptic modifications in cultured hippocampal neurons: dependence on spike  
1705 timing, synaptic strength, and postsynaptic cell type. *J Neurosci* **18**, 10464-10472.
- 1706 Bickle, J. (2015) Marr and reductionism. *Topics in cognitive science* **7**, 299-311.
- 1707 Biel, M., Wahl-Schott, C., Michalakis, S. and Zong, X. (2009) Hyperpolarization-activated cation channels: from  
1708 genes to function. *Physiol Rev* **89**, 847-885.
- 1709 Bienenstock, E. L., Cooper, L. N. and Munro, P. W. (1982) Theory for the development of neuron selectivity:  
1710 orientation specificity and binocular interaction in visual cortex. *J Neurosci* **2**, 32-48.
- 1711 Bird, C. M. and Burgess, N. (2008) The hippocampus and memory: insights from spatial processing. *Nature*  
1712 *reviews. Neuroscience* **9**, 182-194.
- 1713 Birnbaum, S. G., Varga, A. W., Yuan, L. L., Anderson, A. E., Sweatt, J. D. and Schrader, L. A. (2004) Structure and  
1714 function of Kv4-family transient potassium channels. *Physiol Rev* **84**, 803-833.
- 1715 Bittner, K. C., Grienberger, C., Vaidya, S. P., Milstein, A. D., Macklin, J. J., Suh, J., Tonegawa, S. and Magee, J. C.  
1716 (2015) Conjunctive input processing drives feature selectivity in hippocampal CA1 neurons. *Nat*  
1717 *Neurosci* **18**, 1133-1142.
- 1718 Bittner, K. C., Milstein, A. D., Grienberger, C., Romani, S. and Magee, J. C. (2017) Behavioral time scale synaptic  
1719 plasticity underlies CA1 place fields. *Science* **357**, 1033-1036.
- 1720 Bliss, T. V. and Collingridge, G. L. (1993) A synaptic model of memory: long-term potentiation in the  
1721 hippocampus. *Nature* **361**, 31-39.
- 1722 Bliss, T. V. and Gardner-Medwin, A. R. (1973) Long-lasting potentiation of synaptic transmission in the  
1723 dentate area of the unanaesthetized rabbit following stimulation of the perforant path. *J Physiol* **232**,  
1724 357-374.
- 1725 Bliss, T. V. and Lomo, T. (1973) Long-lasting potentiation of synaptic transmission in the dentate area of the  
1726 anaesthetized rabbit following stimulation of the perforant path. *J Physiol* **232**, 331-356.
- 1727 Bouchard, R., Pattarini, R. and Geiger, J. D. (2003) Presence and functional significance of presynaptic  
1728 ryanodine receptors. *Progress in neurobiology* **69**, 391-418.
- 1729 Brager, D. H. and Johnston, D. (2007) Plasticity of intrinsic excitability during long-term depression is  
1730 mediated through mGluR-dependent changes in  $I_{\text{h}}$  in hippocampal CA1 pyramidal neurons.  
1731 *J Neurosci* **27**, 13926-13937.
- 1732 Brager, D. H. and Johnston, D. (2014) Channelopathies and dendritic dysfunction in fragile X syndrome. *Brain*  
1733 *Res Bull* **103C**, 11-17.
- 1734 Brager, D. H., Lewis, A. S., Chetkovich, D. M. and Johnston, D. (2013) Short- and long-term plasticity in CA1  
1735 neurons from mice lacking h-channel auxiliary subunit TRIP8b. *Journal of neurophysiology* **110**,  
1736 2350-2357.
- 1737 Branco, T. and Hausser, M. (2010) The single dendritic branch as a fundamental functional unit in the nervous  
1738 system. *Current opinion in neurobiology* **20**, 494-502.
- 1739 Branco, T. and Hausser, M. (2011) Synaptic integration gradients in single cortical pyramidal cell dendrites.  
1740 *Neuron* **69**, 885-892.
- 1741 Bunsey, M. and Eichenbaum, H. (1996) Conservation of hippocampal memory function in rats and humans.  
1742 *Nature* **379**, 255-257.
- 1743 Buzsaki, G. (1986) Hippocampal sharp waves: their origin and significance. *Brain Res* **398**, 242-252.

- 1744 Buzsaki, G. (1989) Two-stage model of memory trace formation: a role for "noisy" brain states. *Neuroscience*  
1745 **31**, 551-570.
- 1746 Buzsaki, G. (2002) Theta oscillations in the hippocampus. *Neuron* **33**, 325-340.
- 1747 Buzsaki, G. (2006) *Rhythms of the brain*. Oxford University Press: New York.
- 1748 Buzsaki, G. (2010) Neural syntax: cell assemblies, synapsembles, and readers. *Neuron* **68**, 362-385.
- 1749 Buzsaki, G. (2015) Hippocampal sharp wave-ripple: A cognitive biomarker for episodic memory and planning.  
1750 *Hippocampus* **25**, 1073-1188.
- 1751 Buzsaki, G., Anastassiou, C. A. and Koch, C. (2012) The origin of extracellular fields and currents--EEG, ECoG,  
1752 LFP and spikes. *Nature reviews. Neuroscience* **13**, 407-420.
- 1753 Buzsaki, G., Logothetis, N. and Singer, W. (2013) Scaling brain size, keeping timing: evolutionary preservation  
1754 of brain rhythms. *Neuron* **80**, 751-764.
- 1755 Buzsaki, G. and Moser, E. I. (2013) Memory, navigation and theta rhythm in the hippocampal-entorhinal  
1756 system. *Nat Neurosci* **16**, 130-138.
- 1757 Buzsaki, G. and Wang, X. J. (2012) Mechanisms of gamma oscillations. *Annu Rev Neurosci* **35**, 203-225.
- 1758 Cantrell, A. R. and Catterall, W. A. (2001) Neuromodulation of Na<sup>+</sup> channels: an unexpected form of cellular  
1759 plasticity. *Nature reviews. Neuroscience* **2**, 397-407.
- 1760 Carlson, J. M. and Doyle, J. (2002) Complexity and robustness. *Proc Natl Acad Sci U S A* **99 Suppl 1**, 2538-2545.
- 1761 Catterall, W. A. (1993) Structure and function of voltage-gated ion channels. *Trends Neurosci* **16**, 500-506.
- 1762 Catterall, W. A. (1995) Structure and function of voltage-gated ion channels. *Annual review of biochemistry* **64**,  
1763 493-531.
- 1764 Chen, C. C., Lu, J. and Zuo, Y. (2014) Spatiotemporal dynamics of dendritic spines in the living brain. *Frontiers*  
1765 *in neuroanatomy* **8**, 28.
- 1766 Chen, X., Yuan, L. L., Zhao, C., Birnbaum, S. G., Frick, A., Jung, W. E., Schwarz, T. L., Sweatt, J. D. and Johnston, D.  
1767 (2006) Deletion of Kv4.2 gene eliminates dendritic A-type K<sup>+</sup> current and enhances induction of  
1768 long-term potentiation in hippocampal CA1 pyramidal neurons. *J Neurosci* **26**, 12143-12151.
- 1769 Cheong, R., Rhee, A., Wang, C. J., Nemenman, I. and Levchenko, A. (2011) Information transduction capacity of  
1770 noisy biochemical signaling networks. *Science* **334**, 354-358.
- 1771 Chevalyere, V., Takahashi, K. A. and Castillo, P. E. (2006) Endocannabinoid-mediated synaptic plasticity in the  
1772 CNS. *Annu Rev Neurosci* **29**, 37-76.
- 1773 Christie, B. R., Kerr, D. S. and Abraham, W. C. (1994) Flip side of synaptic plasticity: long-term depression  
1774 mechanisms in the hippocampus. *Hippocampus* **4**, 127-135.
- 1775 Christie, B. R., Magee, J. C. and Johnston, D. (1996) The role of dendritic action potentials and Ca<sup>2+</sup> influx in  
1776 the induction of homosynaptic long-term depression in hippocampal CA1 pyramidal neurons. *Learn*  
1777 *Mem* **3**, 160-169.
- 1778 Christie, B. R., Schexnayder, L. K. and Johnston, D. (1997) Contribution of voltage-gated Ca<sup>2+</sup> channels to  
1779 homosynaptic long-term depression in the CA1 region in vitro. *Journal of neurophysiology* **77**, 1651-  
1780 1655.
- 1781 Chung, H. J., Ge, W. P., Qian, X., Wiser, O., Jan, Y. N. and Jan, L. Y. (2009a) G protein-activated inwardly  
1782 rectifying potassium channels mediate depotentiation of long-term potentiation. *Proc Natl Acad Sci U*  
1783 *SA* **106**, 635-640.
- 1784 Chung, H. J., Qian, X., Ehlers, M., Jan, Y. N. and Jan, L. Y. (2009b) Neuronal activity regulates phosphorylation-  
1785 dependent surface delivery of G protein-activated inwardly rectifying potassium channels. *Proc Natl*  
1786 *Acad Sci U S A* **106**, 629-634.
- 1787 Churchland, P. and Sejnowski, T. (1992) *The Computational Brain*. MIT Press: Cambridge, MA.
- 1788 Churchland, P. S. and Sejnowski, T. J. (1988) Perspectives on cognitive neuroscience. *Science* **242**, 741-745.
- 1789 Clemens, A. M. and Johnston, D. (2014) Age- and location-dependent differences in store depletion-induced h-  
1790 channel plasticity in hippocampal pyramidal neurons. *Journal of neurophysiology* **111**, 1369-1382.
- 1791 Cole, K. S. (1968) *Membranes, ions and impulses: A chapter of classical biophysics*. University of California,  
1792 Berkeley press: Berkeley.
- 1793 Colgin, L. L. (2013) Mechanisms and Functions of Theta Rhythms. *Annual Review of Neuroscience, Vol 36* **36**,  
1794 295-312.
- 1795 Colgin, L. L. (2016) Rhythms of the hippocampal network. *Nature reviews. Neuroscience* **17**, 239-249.
- 1796 Colgin, L. L. and Moser, E. I. (2010) Gamma oscillations in the hippocampus. *Physiology* **25**, 319-329.
- 1797 Collingridge, G. L. and Bliss, T. V. P. (1987) NMDA receptors - their role in long-term potentiation. *Trends*  
1798 *Neurosci* **10**, 288-293.

- 1799 Collingridge, G. L., Kehl, S. J. and McLennan, H. (1983) Excitatory amino acids in synaptic transmission in the  
1800 Schaffer collateral-commissural pathway of the rat hippocampus. *J Physiol* **334**, 33-46.
- 1801 Cooper, L. N. and Bear, M. F. (2012) The BCM theory of synapse modification at 30: interaction of theory with  
1802 experiment. *Nature reviews. Neuroscience* **13**, 798-810.
- 1803 Cooper, L. N., Intrator, N., Blais, B. S. and Shouval, H. Z. (2004) *Theory of cortical plasticity*. World Scientific  
1804 Publishing Company: Singapore.
- 1805 Csicsvari, J., Jamieson, B., Wise, K. D. and Buzsaki, G. (2003) Mechanisms of gamma oscillations in the  
1806 hippocampus of the behaving rat. *Neuron* **37**, 311-322.
- 1807 Cusdin, F. S., Clare, J. J. and Jackson, A. P. (2008) Trafficking and cellular distribution of voltage-gated sodium  
1808 channels. *Traffic* **9**, 17-26.
- 1809 Dam, A. M. (1980) Epilepsy and neuron loss in the hippocampus. *Epilepsia* **21**, 617-629.
- 1810 Dan, Y. and Poo, M. M. (2006) Spike timing-dependent plasticity: from synapse to perception. *Physiol Rev* **86**,  
1811 1033-1048.
- 1812 Danielson, N. B., Zaremba, J. D., Kaifosh, P., Bowler, J., Ladow, M. and Losonczy, A. (2016) Sublayer-Specific  
1813 Coding Dynamics during Spatial Navigation and Learning in Hippocampal Area CA1. *Neuron* **91**, 652-  
1814 665.
- 1815 Das, A. and Narayanan, R. (2014) Active dendrites regulate spectral selectivity in location-dependent spike  
1816 initiation dynamics of hippocampal model neurons. *J Neurosci* **34**, 1195-1211.
- 1817 Das, A. and Narayanan, R. (2015) Active dendrites mediate stratified gamma-range coincidence detection in  
1818 hippocampal model neurons. *J Physiol* **593**, 3549-3576.
- 1819 Das, A. and Narayanan, R. (2017) Theta-frequency selectivity in the somatic spike triggered average of rat  
1820 hippocampal pyramidal neurons is dependent on HCN channels. *Journal of neurophysiology* **118**,  
1821 2251-2266.
- 1822 Das, A., Rathour, R. K. and Narayanan, R. (2017) Strings on a Violin: Location Dependence of Frequency  
1823 Tuning in Active Dendrites. *Front Cell Neurosci* **11**, 72.
- 1824 de Lanerolle, N. C., Kim, J. H., Robbins, R. J. and Spencer, D. D. (1989) Hippocampal interneuron loss and  
1825 plasticity in human temporal lobe epilepsy. *Brain Res* **495**, 387-395.
- 1826 De Pitta, M., Volman, V., Berry, H. and Ben-Jacob, E. (2011) A tale of two stories: astrocyte regulation of  
1827 synaptic depression and facilitation. *PLoS computational biology* **7**, e1002293.
- 1828 Deitmer, J. W., McCarthy, K. D., Scemes, E. and Giaume, C. (2006) Information processing and transmission in  
1829 glia: calcium signaling and transmitter release. *Glia* **54**, 639-641.
- 1830 Derdikman, D. and Moser, E. I. (2010) A manifold of spatial maps in the brain. *Trends Cogn Sci* **14**, 561-569.
- 1831 Derkach, V., Barria, A. and Soderling, T. R. (1999) Ca<sup>2+</sup>/calmodulin-kinase II enhances channel conductance  
1832 of alpha-amino-3-hydroxy-5-methyl-4-isoxazolepropionate type glutamate receptors. *Proc Natl Acad*  
1833 *Sci USA* **96**, 3269-3274.
- 1834 Derkach, V. A., Oh, M. C., Guire, E. S. and Soderling, T. R. (2007) Regulatory mechanisms of AMPA receptors in  
1835 synaptic plasticity. *Nature reviews. Neuroscience* **8**, 101-113.
- 1836 Desai, N. S., Cudmore, R. H., Nelson, S. B. and Turrigiano, G. G. (2002) Critical periods for experience-  
1837 dependent synaptic scaling in visual cortex. *Nat Neurosci* **5**, 783-789.
- 1838 Desai, N. S., Rutherford, L. C. and Turrigiano, G. G. (1999) Plasticity in the intrinsic excitability of cortical  
1839 pyramidal neurons. *Nat Neurosci* **2**, 515-520.
- 1840 Dhawale, A. K., Smith, M. A. and Olveczky, B. P. (2017) The Role of Variability in Motor Learning. *Annu Rev*  
1841 *Neurosci* **40**, 479-498.
- 1842 Dhupia, N., Rathour, R. K. and Narayanan, R. (2015) Dendritic atrophy constricts functional maps in resonance  
1843 and impedance properties of hippocampal model neurons. *Front Cell Neurosci* **8**, 456.
- 1844 Diesmann, M., Gewaltig, M. O. and Aertsen, A. (1999) Stable propagation of synchronous spiking in cortical  
1845 neural networks. *Nature* **402**, 529-533.
- 1846 Dingledine, R., Borges, K., Bowie, D. and Traynelis, S. F. (1999) The glutamate receptor ion channels.  
1847 *Pharmacological reviews* **51**, 7-61.
- 1848 Dittman, J. S., Kreitzer, A. C. and Regehr, W. G. (2000) Interplay between facilitation, depression, and residual  
1849 calcium at three presynaptic terminals. *J Neurosci* **20**, 1374-1385.
- 1850 Dobzhansky, T. (1973) Nothing in Biology Makes Sense except in the Light of Evolution. *The Americal Biology*  
1851 *Teacher* **35**, 125-129.
- 1852 Dolmetsch, R. (2003) Excitation-transcription coupling: signaling by ion channels to the nucleus. *Science's*  
1853 *STKE : signal transduction knowledge environment* **2003**, PE4.

- 1854 Dougherty, K. A., Islam, T. and Johnston, D. (2012) Intrinsic excitability of CA1 pyramidal neurones from the  
1855 rat dorsal and ventral hippocampus. *J Physiol* **590**, 5707-5722.
- 1856 Dougherty, K. A., Nicholson, D. A., Diaz, L., Buss, E. W., Neuman, K. M., Chetkovich, D. M. and Johnston, D.  
1857 (2013) Differential expression of HCN subunits alters voltage-dependent gating of h-channels in CA1  
1858 pyramidal neurons from dorsal and ventral hippocampus. *Journal of neurophysiology* **109**, 1940-  
1859 1953.
- 1860 Drion, G., O'Leary, T. and Marder, E. (2015) Ion channel degeneracy enables robust and tunable neuronal  
1861 firing rates. *Proc Natl Acad Sci U S A* **112**, E5361-5370.
- 1862 Dudek, S. M. and Bear, M. F. (1992) Homosynaptic long-term depression in area CA1 of hippocampus and  
1863 effects of N-methyl-D-aspartate receptor blockade. *Proc Natl Acad Sci U S A* **89**, 4363-4367.
- 1864 Dudek, S. M. and Bear, M. F. (1993) Bidirectional long-term modification of synaptic effectiveness in the adult  
1865 and immature hippocampus. *J Neurosci* **13**, 2910-2918.
- 1866 Dudman, J. T., Tsay, D. and Siegelbaum, S. A. (2007) A role for synaptic inputs at distal dendrites: instructive  
1867 signals for hippocampal long-term plasticity. *Neuron* **56**, 866-879.
- 1868 Edelman, G. M. and Gally, J. A. (2001) Degeneracy and complexity in biological systems. *Proc Natl Acad Sci U S*  
1869 *A* **98**, 13763-13768.
- 1870 Eichenbaum, H. (2012) *The Cognitive Neuroscience of Memory: An Introduction*. Oxford University Press: New  
1871 York, NY.
- 1872 Einevoll, G. T., Kayser, C., Logothetis, N. K. and Panzeri, S. (2013) Modelling and analysis of local field  
1873 potentials for studying the function of cortical circuits. *Nature reviews. Neuroscience* **14**, 770-785.
- 1874 Emoto, K. (2011) Dendrite remodeling in development and disease. *Development, growth & differentiation* **53**,  
1875 277-286.
- 1876 Emptage, N. J., Reid, C. A. and Fine, A. (2001) Calcium stores in hippocampal synaptic boutons mediate short-  
1877 term plasticity, store-operated Ca<sup>2+</sup> entry, and spontaneous transmitter release. *Neuron* **29**, 197-  
1878 208.
- 1879 Engel, A. K., Fries, P. and Singer, W. (2001) Dynamic predictions: oscillations and synchrony in top-down  
1880 processing. *Nature reviews. Neuroscience* **2**, 704-716.
- 1881 Engel, A. K. and Singer, W. (2001) Temporal binding and the neural correlates of sensory awareness. *Trends*  
1882 *Cogn Sci* **5**, 16-25.
- 1883 Engert, F. and Bonhoeffer, T. (1999) Dendritic spine changes associated with hippocampal long-term synaptic  
1884 plasticity. *Nature* **399**, 66-70.
- 1885 English, D. F., Peyrache, A., Stark, E., Roux, L., Vallentin, D., Long, M. A. and Buzsaki, G. (2014) Excitation and  
1886 inhibition compete to control spiking during hippocampal ripples: intracellular study in behaving  
1887 mice. *J Neurosci* **34**, 16509-16517.
- 1888 English, J. D. and Sweatt, J. D. (1997) A requirement for the mitogen-activated protein kinase cascade in  
1889 hippocampal long term potentiation. *J Biol Chem* **272**, 19103-19106.
- 1890 Fan, Y., Fricker, D., Brager, D. H., Chen, X., Lu, H. C., Chitwood, R. A. and Johnston, D. (2005) Activity-dependent  
1891 decrease of excitability in rat hippocampal neurons through increases in I(h). *Nat Neurosci* **8**, 1542-  
1892 1551.
- 1893 Fields, R. D. (2010) Neuroscience. Change in the brain's white matter. *Science* **330**, 768-769.
- 1894 Fields, R. D. and Stevens-Graham, B. (2002) New insights into neuron-glia communication. *Science* **298**, 556-  
1895 562.
- 1896 Fioravante, D. and Regehr, W. G. (2011) Short-term forms of presynaptic plasticity. *Current opinion in*  
1897 *neurobiology* **21**, 269-274.
- 1898 Fortune, E. S. and Rose, G. J. (2001) Short-term synaptic plasticity as a temporal filter. *Trends Neurosci* **24**,  
1899 381-385.
- 1900 Foster, W. R., Ungar, L. H. and Schwaber, J. S. (1993) Significance of conductances in Hodgkin-Huxley models.  
1901 *Journal of neurophysiology* **70**, 2502-2518.
- 1902 Freund, T. F. and Buzsaki, G. (1996) Interneurons of the hippocampus. *Hippocampus* **6**, 347-470.
- 1903 Frey, U., Huang, Y. Y. and Kandel, E. R. (1993) Effects of cAMP simulate a late stage of LTP in hippocampal CA1  
1904 neurons. *Science* **260**, 1661-1664.
- 1905 Frick, A. and Johnston, D. (2005) Plasticity of dendritic excitability. *J Neurobiol* **64**, 100-115.
- 1906 Frick, A., Magee, J. and Johnston, D. (2004) LTP is accompanied by an enhanced local excitability of pyramidal  
1907 neuron dendrites. *Nat Neurosci* **7**, 126-135.

- 1908 Frick, A., Magee, J., Koester, H. J., Migliore, M. and Johnston, D. (2003) Normalization of Ca<sup>2+</sup> signals by small  
1909 oblique dendrites of CA1 pyramidal neurons. *J Neurosci* **23**, 3243-3250.
- 1910 Fries, P., Nikolic, D. and Singer, W. (2007) The gamma cycle. *Trends Neurosci* **30**, 309-316.
- 1911 Gallistel, C. R. (2017) The Coding Question. *Trends Cogn Sci* **21**, 498-508.
- 1912 Garcia-Alvarez, G., Shetty, M. S., Lu, B., Yap, K. A., Oh-Hora, M., Sajikumar, S., Bichler, Z. and Fivaz, M. (2015)  
1913 Impaired spatial memory and enhanced long-term potentiation in mice with forebrain-specific  
1914 ablation of the Stim genes. *Frontiers in behavioral neuroscience* **9**, 180.
- 1915 Gasparini, S. and DiFrancesco, D. (1997) Action of the hyperpolarization-activated current (I<sub>h</sub>) blocker ZD  
1916 7288 in hippocampal CA1 neurons. *Pflugers Archiv : European journal of physiology* **435**, 99-106.
- 1917 Gasparini, S. and Magee, J. (2002) Phosphorylation-dependent differences in the activation properties of  
1918 distal and proximal dendritic Na<sup>+</sup> channels in rat CA1 hippocampal neurons. *J Physiol* **541**, 665-672.
- 1919 Geisler, C., Diba, K., Pastalkova, E., Mizuseki, K., Royer, S. and Buzsaki, G. (2010) Temporal delays among place  
1920 cells determine the frequency of population theta oscillations in the hippocampus. *Proc Natl Acad Sci*  
1921 *U S A* **107**, 7957-7962.
- 1922 Geisler, C., Robbe, D., Zugaro, M., Sirota, A. and Buzsaki, G. (2007) Hippocampal place cell assemblies are  
1923 speed-controlled oscillators. *Proc Natl Acad Sci U S A* **104**, 8149-8154.
- 1924 Ghiretti, A. E. and Paradis, S. (2014) Molecular mechanisms of activity-dependent changes in dendritic  
1925 morphology: role of RGK proteins. *Trends Neurosci* **37**, 399-407.
- 1926 Gjorgjieva, J., Drion, G. and Marder, E. (2016) Computational implications of biophysical diversity and  
1927 multiple timescales in neurons and synapses for circuit performance. *Current opinion in neurobiology*  
1928 **37**, 44-52.
- 1929 Golding, N. L., Mickus, T. J., Katz, Y., Kath, W. L. and Spruston, N. (2005) Factors mediating powerful voltage  
1930 attenuation along CA1 pyramidal neuron dendrites. *J Physiol* **568**, 69-82.
- 1931 Golding, N. L. and Oertel, D. (2012) Synaptic integration in dendrites: exceptional need for speed. *J Physiol*  
1932 **590**, 5563-5569.
- 1933 Golding, N. L., Staff, N. P. and Spruston, N. (2002) Dendritic spikes as a mechanism for cooperative long-term  
1934 potentiation. *Nature* **418**, 326-331.
- 1935 Goldman, M. S., Golowasch, J., Marder, E. and Abbott, L. F. (2001) Global structure, robustness, and modulation  
1936 of neuronal models. *J Neurosci* **21**, 5229-5238.
- 1937 Goutagny, R., Jackson, J. and Williams, S. (2009) Self-generated theta oscillations in the hippocampus. *Nat*  
1938 *Neurosci* **12**, 1491-1493.
- 1939 Grant, S. G. (2012) Synaptopathies: diseases of the synaptome. *Current opinion in neurobiology* **22**, 522-529.
- 1940 Grashow, R., Brookings, T. and Marder, E. (2010) Compensation for variable intrinsic neuronal excitability by  
1941 circuit-synaptic interactions. *J Neurosci* **30**, 9145-9156.
- 1942 Grienberger, C., Milstein, A. D., Bittner, K. C., Romani, S. and Magee, J. C. (2017) Inhibitory suppression of  
1943 heterogeneously tuned excitation enhances spatial coding in CA1 place cells. *Nat Neurosci* **20**, 417-  
1944 426.
- 1945 Grosmark, A. D., Mizuseki, K., Pastalkova, E., Diba, K. and Buzsaki, G. (2012) REM sleep reorganizes  
1946 hippocampal excitability. *Neuron* **75**, 1001-1007.
- 1947 Grubb, M. S. and Burrone, J. (2010a) Activity-dependent relocation of the axon initial segment fine-tunes  
1948 neuronal excitability. *Nature* **465**, 1070-1074.
- 1949 Grubb, M. S. and Burrone, J. (2010b) Building and maintaining the axon initial segment. *Current opinion in*  
1950 *neurobiology* **20**, 481-488.
- 1951 Grubb, M. S., Shu, Y., Kuba, H., Rasband, M. N., Wimmer, V. C. and Bender, K. J. (2011) Short- and long-term  
1952 plasticity at the axon initial segment. *J Neurosci* **31**, 16049-16055.
- 1953 Gu, N., Vervaeke, K., Hu, H. and Storm, J. F. (2005) Kv7/KCNQ/M and HCN/h, but not KCa2/SK channels,  
1954 contribute to the somatic medium after-hyperpolarization and excitability control in CA1  
1955 hippocampal pyramidal cells. *J Physiol* **566**, 689-715.
- 1956 Guckenheimer, J. and Holmes, P. J. (1983) *Nonlinear Oscillations, Dynamical Systems, and Bifurcations of Vector*  
1957 *Fields*. Springer: New York.
- 1958 Gurnett, C. A. and Campbell, K. P. (1996) Transmembrane auxiliary subunits of voltage-dependent ion  
1959 channels. *J Biol Chem* **271**, 27975-27978.
- 1960 Halassa, M. M., Fellin, T. and Haydon, P. G. (2007) The tripartite synapse: roles for gliotransmission in health  
1961 and disease. *Trends in molecular medicine* **13**, 54-63.

- 1962 Halassa, M. M. and Haydon, P. G. (2010) Integrated brain circuits: astrocytic networks modulate neuronal  
1963 activity and behavior. *Annual review of physiology* **72**, 335-355.
- 1964 Hammond, R. S., Lin, L., Sidorov, M. S., Wikenheiser, A. M. and Hoffman, D. A. (2008) Protein kinase a mediates  
1965 activity-dependent Kv4.2 channel trafficking. *J Neurosci* **28**, 7513-7519.
- 1966 Hanse, E. and Gustafsson, B. (1994) TEA elicits two distinct potentiations of synaptic transmission in the CA1  
1967 region of the hippocampal slice. *J Neurosci* **14**, 5028-5034.
- 1968 Hanus, C. and Schuman, E. M. (2013) Proteostasis in complex dendrites. *Nature reviews. Neuroscience* **14**, 638-  
1969 648.
- 1970 Hartley, T., Lever, C., Burgess, N. and O'Keefe, J. (2014) Space in the brain: how the hippocampal formation  
1971 supports spatial cognition. *Philos Trans R Soc Lond B Biol Sci* **369**, 20120510.
- 1972 Harvey, C. D., Collman, F., Dombeck, D. A. and Tank, D. W. (2009) Intracellular dynamics of hippocampal place  
1973 cells during virtual navigation. *Nature* **461**, 941-946.
- 1974 Haydon, P. G. and Carmignoto, G. (2006) Astrocyte control of synaptic transmission and neurovascular  
1975 coupling. *Physiol Rev* **86**, 1009-1031.
- 1976 He, C., Chen, F., Li, B. and Hu, Z. (2014) Neurophysiology of HCN channels: from cellular functions to multiple  
1977 regulations. *Progress in neurobiology* **112**, 1-23.
- 1978 Hengen, K. B., Torrado Pacheco, A., McGregor, J. N., Van Hooser, S. D. and Turrigiano, G. G. (2016) Neuronal  
1979 Firing Rate Homeostasis Is Inhibited by Sleep and Promoted by Wake. *Cell* **165**, 180-191.
- 1980 Henneberger, C., Papouin, T., Oliet, S. H. and Rusakov, D. A. (2010) Long-term potentiation depends on release  
1981 of D-serine from astrocytes. *Nature* **463**, 232-236.
- 1982 Higley, M. J. and Sabatini, B. L. (2012) Calcium signaling in dendritic spines. *Cold Spring Harb Perspect Biol* **4**,  
1983 a005686.
- 1984 Hille, B. (2001) Ion Channels of Excitable Membranes. *Sinauer Associates, Inc.*
- 1985 Hines, M. L., Morse, T., Migliore, M., Carnevale, N. T. and Shepherd, G. M. (2004) ModelDB: A Database to  
1986 Support Computational Neuroscience. *J Comput Neurosci* **17**, 7-11.
- 1987 Hobbs, K. H. and Hooper, S. L. (2008) Using complicated, wide dynamic range driving to develop models of  
1988 single neurons in single recording sessions. *Journal of neurophysiology* **99**, 1871-1883.
- 1989 Hodgkin, A. L. and Huxley, A. F. (1952) A quantitative description of membrane current and its application to  
1990 conduction and excitation in nerve. *J Physiol* **117**, 500-544.
- 1991 Hoffman, D. A. and Johnston, D. (1999) Neuromodulation of dendritic action potentials. *Journal of*  
1992 *neurophysiology* **81**, 408-411.
- 1993 Hoffman, D. A., Magee, J. C., Colbert, C. M. and Johnston, D. (1997) K<sup>+</sup> channel regulation of signal propagation  
1994 in dendrites of hippocampal pyramidal neurons. *Nature* **387**, 869-875.
- 1995 Hoffman, D. A., Sprengel, R. and Sakmann, B. (2002) Molecular dissection of hippocampal theta-burst pairing  
1996 potentiation. *Proc Natl Acad Sci U S A* **99**, 7740-7745.
- 1997 Holzer, P. (2009) Acid-sensitive ion channels and receptors. *Handbook of experimental pharmacology*, 283-  
1998 332.
- 1999 Hong, S., Ratte, S., Prescott, S. A. and De Schutter, E. (2012) Single neuron firing properties impact correlation-  
2000 based population coding. *J Neurosci* **32**, 1413-1428.
- 2001 Honnuraiah, S. and Narayanan, R. (2013) A calcium-dependent plasticity rule for HCN channels maintains  
2002 activity homeostasis and stable synaptic learning. *PLoS one* **8**, e55590.
- 2003 Hu, H., Vervaeke, K., Graham, L. J. and Storm, J. F. (2009) Complementary theta resonance filtering by two  
2004 spatially segregated mechanisms in CA1 hippocampal pyramidal neurons. *J Neurosci* **29**, 14472-  
2005 14483.
- 2006 Hu, H., Vervaeke, K. and Storm, J. F. (2002) Two forms of electrical resonance at theta frequencies, generated  
2007 by M-current, h-current and persistent Na<sup>+</sup> current in rat hippocampal pyramidal cells. *J Physiol* **545**,  
2008 783-805.
- 2009 Hu, H., Vervaeke, K. and Storm, J. F. (2007) M-channels (Kv7/KCNQ channels) that regulate synaptic  
2010 integration, excitability, and spike pattern of CA1 pyramidal cells are located in the perisomatic  
2011 region. *J Neurosci* **27**, 1853-1867.
- 2012 Huang, C. S., Shi, S. H., Ule, J., Ruggiu, M., Barker, L. A., Darnell, R. B., Jan, Y. N. and Jan, L. Y. (2005) Common  
2013 molecular pathways mediate long-term potentiation of synaptic excitation and slow synaptic  
2014 inhibition. *Cell* **123**, 105-118.



- 2015 Huang, Y. Y. and Malenka, R. C. (1993) Examination of TEA-induced synaptic enhancement in area CA1 of the  
2016 hippocampus: the role of voltage-dependent Ca<sup>2+</sup> channels in the induction of LTP. *J Neurosci* **13**,  
2017 568-576.
- 2018 Huber, K. M., Kayser, M. S. and Bear, M. F. (2000) Role for rapid dendritic protein synthesis in hippocampal  
2019 mGluR-dependent long-term depression. *Science* **288**, 1254-1257.
- 2020 Huber, K. M., Mauk, M. D. and Kelly, P. T. (1995) Distinct LTP induction mechanisms: contribution of NMDA  
2021 receptors and voltage-dependent calcium channels. *Journal of neurophysiology* **73**, 270-279.
- 2022 Hulme, S. R., Jones, O. D. and Abraham, W. C. (2013) Emerging roles of metaplasticity in behaviour and  
2023 disease. *Trends Neurosci* **36**, 353-362.
- 2024 Hutcheon, B. and Yarom, Y. (2000) Resonance, oscillation and the intrinsic frequency preferences of neurons.  
2025 *Trends Neurosci* **23**, 216-222.
- 2026 Huxter, J., Burgess, N. and O'Keefe, J. (2003) Independent rate and temporal coding in hippocampal pyramidal  
2027 cells. *Nature* **425**, 828-832.
- 2028 Ibata, K., Sun, Q. and Turrigiano, G. G. (2008) Rapid synaptic scaling induced by changes in postsynaptic firing.  
2029 *Neuron* **57**, 819-826.
- 2030 Ikegaya, Y., Kim, J. A., Baba, M., Iwatsubo, T., Nishiyama, N. and Matsuki, N. (2001) Rapid and reversible  
2031 changes in dendrite morphology and synaptic efficacy following NMDA receptor activation:  
2032 implication for a cellular defense against excitotoxicity. *Journal of cell science* **114**, 4083-4093.
- 2033 Isom, L. L., De Jongh, K. S. and Catterall, W. A. (1994) Auxiliary subunits of voltage-gated ion channels. *Neuron*  
2034 **12**, 1183-1194.
- 2035 Jaffe, D. B., Johnston, D., Lasser-Ross, N., Lisman, J. E., Miyakawa, H. and Ross, W. N. (1992) The spread of Na<sup>+</sup>  
2036 spikes determines the pattern of dendritic Ca<sup>2+</sup> entry into hippocampal neurons. *Nature* **357**, 244-  
2037 246.
- 2038 James, W. (1890) *The principles of psychology*. Henry Holt & Co., NY.
- 2039 Jaramillo, J. and Kempter, R. (2017) Phase precession: a neural code underlying episodic memory? *Current*  
2040 *opinion in neurobiology* **43**, 130-138.
- 2041 Jazayeri, M. and Afraz, A. (2017) Navigating the Neural Space in Search of the Neural Code. *Neuron* **93**, 1003-  
2042 1014.
- 2043 Jedlicka, P., Benuskova, L. and Abraham, W. C. (2015) A Voltage-Based STDP Rule Combined with Fast BCM-  
2044 Like Metaplasticity Accounts for LTP and Concurrent "Heterosynaptic" LTD in the Dentate Gyrus In  
2045 Vivo. *PLoS computational biology* **11**, e1004588.
- 2046 Jensen, C. S., Rasmussen, H. B. and Misonou, H. (2011) Neuronal trafficking of voltage-gated potassium  
2047 channels. *Molecular and cellular neurosciences* **48**, 288-297.
- 2048 Jerng, H. H., Pfaffinger, P. J. and Covarrubias, M. (2004) Molecular physiology and modulation of  
2049 somatodendritic A-type potassium channels. *Molecular and cellular neurosciences* **27**, 343-369.
- 2050 Johnston, D., Christie, B. R., Frick, A., Gray, R., Hoffman, D. A., Schexnayder, L. K., Watanabe, S. and Yuan, L. L.  
2051 (2003) Active dendrites, potassium channels and synaptic plasticity. *Philos Trans R Soc Lond B Biol*  
2052 *Sci* **358**, 667-674.
- 2053 Johnston, D., Frick, A. and Poolos, N. (2016) Dendrites and disease. In: *Dendrites*. Eds. G. Stuart, N. Spruston, M.  
2054 Hausser. Oxford University Press: New York, NY.
- 2055 Johnston, D., Magee, J. C., Colbert, C. M. and Christie, B. R. (1996) Active properties of neuronal dendrites. *Annu*  
2056 *Rev Neurosci* **19**, 165-186.
- 2057 Johnston, D. and Narayanan, R. (2008) Active dendrites: colorful wings of the mysterious butterflies. *Trends*  
2058 *Neurosci* **31**, 309-316.
- 2059 Johnston, D., Williams, S., Jaffe, D. and Gray, R. (1992) NMDA-receptor-independent long-term potentiation.  
2060 *Annual review of physiology* **54**, 489-505.
- 2061 Jonas, E. and Kording, K. P. (2017) Could a Neuroscientist Understand a Microprocessor? *PLoS computational*  
2062 *biology* **13**, e1005268.
- 2063 Jorntell, H. and Hansel, C. (2006) Synaptic memories upside down: bidirectional plasticity at cerebellar  
2064 parallel fiber-Purkinje cell synapses. *Neuron* **52**, 227-238.
- 2065 Joshi, N. J., Tononi, G. and Koch, C. (2013) The minimal complexity of adapting agents increases with fitness.  
2066 *PLoS computational biology* **9**, e1003111.
- 2067 Jung, S. C., Kim, J. and Hoffman, D. A. (2008) Rapid, bidirectional remodeling of synaptic NMDA receptor  
2068 subunit composition by A-type K<sup>+</sup> channel activity in hippocampal CA1 pyramidal neurons. *Neuron*  
2069 **60**, 657-671.

- 2070 Kajikawa, Y. and Schroeder, C. E. (2011) How local is the local field potential? *Neuron* **72**, 847-858.
- 2071 Kalantzis, G. and Shouval, H. Z. (2009) Structural plasticity can produce metaplasticity. *PloS one* **4**, e8062.
- 2072 Kamondi, A., Acsady, L., Wang, X. J. and Buzsaki, G. (1998) Theta oscillations in somata and dendrites of  
2073 hippocampal pyramidal cells in vivo: activity-dependent phase-precession of action potentials.  
2074 *Hippocampus* **8**, 244-261.
- 2075 Kandel, E. R. (2001) The molecular biology of memory storage: a dialogue between genes and synapses.  
2076 *Science* **294**, 1030-1038.
- 2077 Kandel, E. R., Dudai, Y. and Mayford, M. R. (2014) The molecular and systems biology of memory. *Cell* **157**,  
2078 163-186.
- 2079 Katz, P. S. (2016) Evolution of central pattern generators and rhythmic behaviours. *Philos Trans R Soc Lond B*  
2080 *Biol Sci* **371**, 20150057.
- 2081 Katzner, S., Nauhaus, I., Benucci, A., Bonin, V., Ringach, D. L. and Carandini, M. (2009) Local origin of field  
2082 potentials in visual cortex. *Neuron* **61**, 35-41.
- 2083 Kennedy, M. B. (2000) Signal-processing machines at the postsynaptic density. *Science* **290**, 750-754.
- 2084 Kennedy, M. B., Beale, H. C., Carlisle, H. J. and Washburn, L. R. (2005) Integration of biochemical signalling in  
2085 spines. *Nature reviews. Neuroscience* **6**, 423-434.
- 2086 Khakh, B. S. and Sofroniew, M. V. (2015) Diversity of astrocyte functions and phenotypes in neural circuits.  
2087 *Nat Neurosci* **18**, 942-952.
- 2088 Kholodenko, B. N. (2006) Cell-signalling dynamics in time and space. *Nat Rev Mol Cell Biol* **7**, 165-176.
- 2089 Kim, C. S., Brager, D. H. and Johnston, D. (2017) Perisomatic changes in h-channels regulate depressive  
2090 behaviors following chronic unpredictable stress. *Molecular psychiatry*.
- 2091 Kim, C. S. and Johnston, D. (2015) A1 adenosine receptor-mediated GIRK channels contribute to the resting  
2092 conductance of CA1 neurons in the dorsal hippocampus. *Journal of neurophysiology* **113**, 2511-2523.
- 2093 Kim, J., Jung, S. C., Clemens, A. M., Petralia, R. S. and Hoffman, D. A. (2007) Regulation of dendritic excitability  
2094 by activity-dependent trafficking of the A-type K<sup>+</sup> channel subunit Kv4.2 in hippocampal neurons.  
2095 *Neuron* **54**, 933-947.
- 2096 Kim, J., Wei, D. S. and Hoffman, D. A. (2005) Kv4 potassium channel subunits control action potential  
2097 repolarization and frequency-dependent broadening in rat hippocampal CA1 pyramidal neurones. *J*  
2098 *Physiol* **569**, 41-57.
- 2099 Kim, S. J. and Linden, D. J. (2007) Ubiquitous plasticity and memory storage. *Neuron* **56**, 582-592.
- 2100 Kim, Y., Hsu, C. L., Cembrowski, M. S., Mensh, B. D. and Spruston, N. (2015) Dendritic sodium spikes are  
2101 required for long-term potentiation at distal synapses on hippocampal pyramidal neurons. *eLife* **4**.
- 2102 Kitano, H. (2007) Towards a theory of biological robustness. *Molecular systems biology* **3**, 137.
- 2103 Klausberger, T. and Somogyi, P. (2008) Neuronal diversity and temporal dynamics: the unity of hippocampal  
2104 circuit operations. *Science* **321**, 53-57.
- 2105 Koester, H. J. and Johnston, D. (2005) Target cell-dependent normalization of transmitter release at  
2106 neocortical synapses. *Science* **308**, 863-866.
- 2107 Korte, M. and Schmitz, D. (2016) Cellular and System Biology of Memory: Timing, Molecules, and Beyond.  
2108 *Physiol Rev* **96**, 647-693.
- 2109 Kotaleski, J. H. and Blackwell, K. T. (2010) Modelling the molecular mechanisms of synaptic plasticity using  
2110 systems biology approaches. *Nature reviews. Neuroscience* **11**, 239-251.
- 2111 Krakauer, J. W., Ghazanfar, A. A., Gomez-Marin, A., MacIver, M. A. and Poeppel, D. (2017) Neuroscience Needs  
2112 Behavior: Correcting a Reductionist Bias. *Neuron* **93**, 480-490.
- 2113 Krichmar, J. L., Nasuto, S. J., Scorcioni, R., Washington, S. D. and Ascoli, G. A. (2002) Effects of dendritic  
2114 morphology on CA3 pyramidal cell electrophysiology: a simulation study. *Brain Res* **941**, 11-28.
- 2115 Kullmann, D. M. (2002) The neuronal channelopathies. *Brain : a journal of neurology* **125**, 1177-1195.
- 2116 Lai, H. C. and Jan, L. Y. (2006) The distribution and targeting of neuronal voltage-gated ion channels. *Nature*  
2117 *reviews. Neuroscience* **7**, 548-562.
- 2118 Lamprecht, R. and LeDoux, J. (2004) Structural plasticity and memory. *Nature reviews. Neuroscience* **5**, 45-54.
- 2119 Larkman, A. U. and Jack, J. J. (1995) Synaptic plasticity: hippocampal LTP. *Current opinion in neurobiology* **5**,  
2120 324-334.
- 2121 Larsen, R. S. and Sjostrom, P. J. (2015) Synapse-type-specific plasticity in local circuits. *Current opinion in*  
2122 *neurobiology* **35**, 127-135.
- 2123 Larson, J., Wong, D. and Lynch, G. (1986) Patterned stimulation at the theta frequency is optimal for the  
2124 induction of hippocampal long-term potentiation. *Brain Res* **368**, 347-350.

- 2125 Lau, C. G. and Zukin, R. S. (2007) NMDA receptor trafficking in synaptic plasticity and neuropsychiatric  
2126 disorders. *Nature reviews. Neuroscience* **8**, 413-426.
- 2127 Lazebnik, Y. (2002) Can a biologist fix a radio?--Or, what I learned while studying apoptosis. *Cancer cell* **2**,  
2128 179-182.
- 2129 Lee, D., Lin, B. J. and Lee, A. K. (2012) Hippocampal place fields emerge upon single-cell manipulation of  
2130 excitability during behavior. *Science* **337**, 849-853.
- 2131 Lee, H. Y. and Jan, L. Y. (2012) Fragile X syndrome: mechanistic insights and therapeutic avenues regarding  
2132 the role of potassium channels. *Current opinion in neurobiology* **22**, 887-894.
- 2133 Lee, S. H. and Dan, Y. (2012) Neuromodulation of brain states. *Neuron* **76**, 209-222.
- 2134 Lehmann-Horn, F. and Jurkat-Rott, K. (1999) Voltage-Gated Ion Channels and Hereditary Disease. *Physiol Rev*,  
2135 1317-1372.
- 2136 Lein, E. S., Hawrylycz, M. J., Ao, N., Ayres, M., Bensinger, A., Bernard, A., Boe, A. F., Boguski, M. S., Brockway, K.  
2137 S., Byrnes, E. J., Chen, L., Chen, L., Chen, T. M., Chin, M. C., Chong, J., Crook, B. E., Czaplinska, A., Dang, C.  
2138 N., Datta, S., Dee, N. R., Desaki, A. L., Desta, T., Diep, E., Dolbeare, T. A., Donelan, M. J., Dong, H. W.,  
2139 Dougherty, J. G., Duncan, B. J., Ebbert, A. J., Eichele, G., Estin, L. K., Faber, C., Facer, B. A., Fields, R.,  
2140 Fischer, S. R., Fliss, T. P., Frensley, C., Gates, S. N., Glattfelder, K. J., Halverson, K. R., Hart, M. R.,  
2141 Hohmann, J. G., Howell, M. P., Jeung, D. P., Johnson, R. A., Karr, P. T., Kawal, R., Kidney, J. M., Knapik, R.  
2142 H., Kuan, C. L., Lake, J. H., Laramée, A. R., Larsen, K. D., Lau, C., Lemon, T. A., Liang, A. J., Liu, Y., Luong,  
2143 L. T., Michaels, J., Morgan, J. J., Morgan, R. J., Mortrud, M. T., Mosqueda, N. F., Ng, L. L., Ng, R., Orta, G. J.,  
2144 Overly, C. C., Pak, T. H., Parry, S. E., Pathak, S. D., Pearson, O. C., Puchalski, R. B., Riley, Z. L., Rockett, H.  
2145 R., Rowland, S. A., Royall, J. J., Ruiz, M. J., Sarno, N. R., Schaffnit, K., Shapovalova, N. V., Sivasay, T.,  
2146 Slaughterbeck, C. R., Smith, S. C., Smith, K. A., Smith, B. I., Sotd, A. J., Stewart, N. N., Stumpf, K. R.,  
2147 Sunkin, S. M., Sutram, M., Tam, A., Teemer, C. D., Thaller, C., Thompson, C. L., Varnam, L. R., Visel, A.,  
2148 Whitlock, R. M., Wohnoutka, P. E., Wolkey, C. K., Wong, V. Y., Wood, M., Yaylaoglu, M. B., Young, R. C.,  
2149 Youngstrom, B. L., Yuan, X. F., Zhang, B., Zwingman, T. A. and Jones, A. R. (2007) Genome-wide atlas of  
2150 gene expression in the adult mouse brain. *Nature* **445**, 168-176.
- 2151 LeMasson, G., Marder, E. and Abbott, L. F. (1993) Activity-dependent regulation of conductances in model  
2152 neurons. *Science* **259**, 1915-1917.
- 2153 Leonardo, A. (2005) Degenerate coding in neural systems. *Journal of comparative physiology. A*,  
2154 *Neuroethology, sensory, neural, and behavioral physiology* **191**, 995-1010.
- 2155 Lerche, H., Shah, M., Beck, H., Noebels, J., Johnston, D. and Vincent, A. (2013) Ion channels in genetic and  
2156 acquired forms of epilepsy. *J Physiol* **591**, 753-764.
- 2157 Levitan, I. and Barrantes, F. (2012) *Cholesterol Regulation of Ion Channels and Receptors*. John Wiley & Sons.
- 2158 Levitan, I. B. (1994) Modulation of ion channels by protein phosphorylation and dephosphorylation. *Annual*  
2159 *review of physiology* **56**, 193-212.
- 2160 Lewis, A. S., Vaidya, S. P., Blaiss, C. A., Liu, Z., Stoub, T. R., Brager, D. H., Chen, X., Bender, R. A., Estep, C. M.,  
2161 Popov, A. B., Kang, C. E., Van Veldhoven, P. P., Bayliss, D. A., Nicholson, D. A., Powell, C. M., Johnston, D.  
2162 and Chetkovich, D. M. (2011) Deletion of the hyperpolarization-activated cyclic nucleotide-gated  
2163 channel auxiliary subunit TRIP8b impairs hippocampal Ih localization and function and promotes  
2164 antidepressant behavior in mice. *J Neurosci* **31**, 7424-7440.
- 2165 Lin, L., Sun, W., Kung, F., Dell'Acqua, M. L. and Hoffman, D. A. (2011) AKAP79/150 impacts intrinsic  
2166 excitability of hippocampal neurons through phospho-regulation of A-type K<sup>+</sup> channel trafficking. *J*  
2167 *Neurosci* **31**, 1323-1332.
- 2168 Lin, L., Sun, W., Wikenheiser, A. M., Kung, F. and Hoffman, D. A. (2010) KChIP4a regulates Kv4.2 channel  
2169 trafficking through PKA phosphorylation. *Molecular and cellular neurosciences* **43**, 315-325.
- 2170 Lin, M. T., Lujan, R., Watanabe, M., Adelman, J. P. and Maylie, J. (2008) SK2 channel plasticity contributes to  
2171 LTP at Schaffer collateral-CA1 synapses. *Nat Neurosci* **11**, 170-177.
- 2172 Linden, H., Tetzlaff, T., Potjans, T. C., Pettersen, K. H., Grun, S., Diesmann, M. and Einevoll, G. T. (2011)  
2173 Modeling the spatial reach of the LFP. *Neuron* **72**, 859-872.
- 2174 Lisman, J. (1989) A mechanism for the Hebb and the anti-Hebb processes underlying learning and memory.  
2175 *Proc Natl Acad Sci U S A* **86**, 9574-9578.
- 2176 Lisman, J. (2005) The theta/gamma discrete phase code occurring during the hippocampal phase precession  
2177 may be a more general brain coding scheme. *Hippocampus* **15**, 913-922.
- 2178 Lisman, J., Schulman, H. and Cline, H. (2002) The molecular basis of CaMKII function in synaptic and  
2179 behavioural memory. *Nature reviews. Neuroscience* **3**, 175-190.

- 2180 Lisman, J., Yasuda, R. and Raghavachari, S. (2012) Mechanisms of CaMKII action in long-term potentiation.  
2181 *Nature reviews. Neuroscience* **13**, 169-182.
- 2182 Lisman, J. E. (2001) Three Ca<sup>2+</sup> levels affect plasticity differently: the LTP zone, the LTD zone and no man's  
2183 land. *J Physiol* **532**, 285.
- 2184 Lisman, J. E. and Jensen, O. (2013) The theta-gamma neural code. *Neuron* **77**, 1002-1016.
- 2185 Llinas, R. R. (1988) The intrinsic electrophysiological properties of mammalian neurons: insights into central  
2186 nervous system function. *Science* **242**, 1654-1664.
- 2187 London, M., Roth, A., Beeren, L., Hausser, M. and Latham, P. E. (2010) Sensitivity to perturbations in vivo  
2188 implies high noise and suggests rate coding in cortex. *Nature* **466**, 123-127.
- 2189 Losick, R. and Desplan, C. (2008) Stochasticity and cell fate. *Science* **320**, 65-68.
- 2190 Losonczy, A., Makara, J. K. and Magee, J. C. (2008) Compartmentalized dendritic plasticity and input feature  
2191 storage in neurons. *Nature* **452**, 436-441.
- 2192 Losonczy, A., Zemelman, B. V., Vaziri, A. and Magee, J. C. (2010) Network mechanisms of theta related  
2193 neuronal activity in hippocampal CA1 pyramidal neurons. *Nat Neurosci* **13**, 967-972.
- 2194 Lujan, R., Maylie, J. and Adelman, J. P. (2009) New sites of action for GIRK and SK channels. *Nature reviews.*  
2195 *Neuroscience* **10**, 475-480.
- 2196 Luo, L. and Flanagan, J. G. (2007) Development of continuous and discrete neural maps. *Neuron* **56**, 284-300.
- 2197 Luo, L. and O'Leary, D. D. (2005) Axon retraction and degeneration in development and disease. *Annu Rev*  
2198 *Neurosci* **28**, 127-156.
- 2199 Lynch, G., Larson, J., Kelso, S., Barrionuevo, G. and Schottler, F. (1983) Intracellular injections of EGTA block  
2200 induction of hippocampal long-term potentiation. *Nature* **305**, 719-721.
- 2201 Lynch, G. S., Dunwiddie, T. and Gribkoff, V. (1977) Heterosynaptic depression: a postsynaptic correlate of  
2202 long-term potentiation. *Nature* **266**, 737-739.
- 2203 Lynch, M. A. (2004) Long-term potentiation and memory. *Physiol Rev* **84**, 87-136.
- 2204 Magee, J. C. (2000) Dendritic integration of excitatory synaptic input. *Nature reviews. Neuroscience* **1**, 181-  
2205 190.
- 2206 Magee, J. C. (2001) Dendritic mechanisms of phase precession in hippocampal CA1 pyramidal neurons.  
2207 *Journal of neurophysiology* **86**, 528-532.
- 2208 Magee, J. C. and Cook, E. P. (2000) Somatic EPSP amplitude is independent of synapse location in hippocampal  
2209 pyramidal neurons. *Nat Neurosci* **3**, 895-903.
- 2210 Magee, J. C. and Johnston, D. (1997) A synaptically controlled, associative signal for Hebbian plasticity in  
2211 hippocampal neurons. *Science* **275**, 209-213.
- 2212 Mainen, Z. F. and Sejnowski, T. J. (1996) Influence of dendritic structure on firing pattern in model neocortical  
2213 neurons. *Nature* **382**, 363-366.
- 2214 Majewski, L. and Kuznicki, J. (2015) SOCE in neurons: Signaling or just refilling? *Biochimica et biophysica acta*  
2215 **1853**, 1940-1952.
- 2216 Majewski, L., Maciag, F., Boguszewski, P. M., Wasilewska, I., Wiera, G., Wojtowicz, T., Mozrzymas, J. and  
2217 Kuznicki, J. (2016) Overexpression of STIM1 in neurons in mouse brain improves contextual learning  
2218 and impairs long-term depression. *Biochimica et biophysica acta*.
- 2219 Malenka, R. C., Lancaster, B. and Zucker, R. S. (1992) Temporal limits on the rise in postsynaptic calcium  
2220 required for the induction of long-term potentiation. *Neuron* **9**, 121-128.
- 2221 Malik, R., Dougherty, K. A., Parikh, K., Byrne, C. and Johnston, D. (2016) Mapping the electrophysiological and  
2222 morphological properties of CA1 pyramidal neurons along the longitudinal hippocampal axis.  
2223 *Hippocampus* **26**, 341-361.
- 2224 Malik, R. and Johnston, D. (2017) Dendritic GIRK Channels Gate the Integration Window, Plateau Potentials,  
2225 and Induction of Synaptic Plasticity in Dorsal But Not Ventral CA1 Neurons. *J Neurosci* **37**, 3940-  
2226 3955.
- 2227 Malinow, R., Schulman, H. and Tsien, R. W. (1989) Inhibition of postsynaptic PKC or CaMKII blocks induction  
2228 but not expression of LTP. *Science* **245**, 862-866.
- 2229 Manninen, T., Hituri, K., Kotaleski, J. H., Blackwell, K. T. and Linne, M. L. (2010) Postsynaptic signal  
2230 transduction models for long-term potentiation and depression. *Frontiers in computational*  
2231 *neuroscience* **4**, 152.
- 2232 Marder, E. (1998) From biophysics to models of network function. *Annu Rev Neurosci* **21**, 25-45.
- 2233 Marder, E. (2011) Variability, compensation, and modulation in neurons and circuits. *Proc Natl Acad Sci U S A*  
2234 **108 Suppl 3**, 15542-15548.

- 2235 Marder, E. (2012) Neuromodulation of neuronal circuits: back to the future. *Neuron* **76**, 1-11.
- 2236 Marder, E., Abbott, L. F., Turrigiano, G. G., Liu, Z. and Golowasch, J. (1996) Memory from the dynamics of  
2237 intrinsic membrane currents. *Proc Natl Acad Sci U S A* **93**, 13481-13486.
- 2238 Marder, E. and Goaillard, J. M. (2006) Variability, compensation and homeostasis in neuron and network  
2239 function. *Nature reviews. Neuroscience* **7**, 563-574.
- 2240 Marder, E., Goeritz, M. L. and Otopalik, A. G. (2015) Robust circuit rhythms in small circuits arise from  
2241 variable circuit components and mechanisms. *Current opinion in neurobiology* **31**, 156-163.
- 2242 Marder, E., O'Leary, T. and Shruti, S. (2014) Neuromodulation of circuits with variable parameters: single  
2243 neurons and small circuits reveal principles of state-dependent and robust neuromodulation. *Annu*  
2244 *Rev Neurosci* **37**, 329-346.
- 2245 Marder, E. and Taylor, A. L. (2011) Multiple models to capture the variability in biological neurons and  
2246 networks. *Nat Neurosci* **14**, 133-138.
- 2247 Marder, E. and Thirumalai, V. (2002) Cellular, synaptic and network effects of neuromodulation. *Neural Netw*  
2248 **15**, 479-493.
- 2249 Markram, H., Lubke, J., Frotscher, M. and Sakmann, B. (1997) Regulation of synaptic efficacy by coincidence of  
2250 postsynaptic APs and EPSPs. *Science* **275**, 213-215.
- 2251 Marr, D. (1971) Simple memory: a theory for archicortex. *Philos Trans R Soc Lond B Biol Sci* **262**, 23-81.
- 2252 Martin, S. J., Grimwood, P. D. and Morris, R. G. (2000) Synaptic plasticity and memory: an evaluation of the  
2253 hypothesis. *Annu Rev Neurosci* **23**, 649-711.
- 2254 Martinez, J. L., Jr. and Derrick, B. E. (1996) Long-term potentiation and learning. *Annu Rev Psychol* **47**, 173-  
2255 203.
- 2256 Matsuzaki, M., Honkura, N., Ellis-Davies, G. and Kasai, H. (2004) Structural basis of long-term potentiation in  
2257 single dendritic spines. *Nature* **429**, 761-766.
- 2258 Mauro, A. (1961) Anomalous impedance, a phenomenological property of time-variant resistance. An analytic  
2259 review. *Biophysical journal* **1**, 353-372.
- 2260 Mauro, A., Conti, F., Dodge, F. and Schor, R. (1970) Subthreshold behavior and phenomenological impedance  
2261 of the squid giant axon. *The Journal of general physiology* **55**, 497-523.
- 2262 Mayford, M., Siegelbaum, S. A. and Kandel, E. R. (2012) Synapses and memory storage. *Cold Spring Harb*  
2263 *Perspect Biol* **4**.
- 2264 Mehta, M. R., Lee, A. K. and Wilson, M. A. (2002) Role of experience and oscillations in transforming a rate  
2265 code into a temporal code. *Nature* **417**, 741-746.
- 2266 Migliore, M., De Simone, G. and Migliore, R. (2015) Effect of the initial synaptic state on the probability to  
2267 induce long-term potentiation and depression. *Biophysical journal* **108**, 1038-1046.
- 2268 Migliore, M. and Migliore, R. (2012) Know your current I(h): interaction with a shunting current explains the  
2269 puzzling effects of its pharmacological or pathological modulations. *PLoS one* **7**, e36867.
- 2270 Migliore, M. and Shepherd, G. M. (2002) Emerging rules for the distributions of active dendritic conductances.  
2271 *Nature reviews. Neuroscience* **3**, 362-370.
- 2272 Migliore, M. and Shepherd, G. M. (2005) Opinion: an integrated approach to classifying neuronal phenotypes.  
2273 *Nature reviews. Neuroscience* **6**, 810-818.
- 2274 Miller, K. D. and MacKay, D. J. C. (1994) The role of constraints in Hebbian learning. *Neural Comput* **6**, 100-  
2275 126.
- 2276 Mishra, P. and Narayanan, R. (2015) High-conductance states and A-type K<sup>+</sup> channels are potential regulators  
2277 of the conductance-current balance triggered by HCN channels. *Journal of neurophysiology* **113**, 23-  
2278 43.
- 2279 Misonou, H., Mohapatra, D. P., Park, E. W., Leung, V., Zhen, D., Misonou, K., Anderson, A. E. and Trimmer, J. S.  
2280 (2004) Regulation of ion channel localization and phosphorylation by neuronal activity. *Nat Neurosci*  
2281 **7**, 711-718.
- 2282 Miyakawa, H., Ross, W. N., Jaffe, D., Callaway, J. C., Lasser-Ross, N., Lisman, J. E. and Johnston, D. (1992)  
2283 Synaptically activated increases in Ca<sup>2+</sup> concentration in hippocampal CA1 pyramidal cells are  
2284 primarily due to voltage-gated Ca<sup>2+</sup> channels. *Neuron* **9**, 1163-1173.
- 2285 Mizuseki, K. and Buzsaki, G. (2014) Theta oscillations decrease spike synchrony in the hippocampus and  
2286 entorhinal cortex. *Philos Trans R Soc Lond B Biol Sci* **369**, 20120530.
- 2287 Montgomery, S. M., Sirota, A. and Buzsaki, G. (2008) Theta and gamma coordination of hippocampal networks  
2288 during waking and rapid eye movement sleep. *J Neurosci* **28**, 6731-6741.

- 2289 Moosmang, S., Haider, N., Klugbauer, N., Adelsberger, H., Langwieser, N., Muller, J., Stiess, M., Marais, E.,  
2290 Schulla, V., Lacinova, L., Goebbels, S., Nave, K. A., Storm, D. R., Hofmann, F. and Kleppisch, T. (2005)  
2291 Role of hippocampal Cav1.2 Ca<sup>2+</sup> channels in NMDA receptor-independent synaptic plasticity and  
2292 spatial memory. *J Neurosci* **25**, 9883-9892.
- 2293 Morris, R. G. (1989) Synaptic plasticity and learning: selective impairment of learning rats and blockade of  
2294 long-term potentiation in vivo by the N-methyl-D-aspartate receptor antagonist AP5. *J Neurosci* **9**,  
2295 3040-3057.
- 2296 Morris, R. G., Anderson, E., Lynch, G. S. and Baudry, M. (1986) Selective impairment of learning and blockade  
2297 of long-term potentiation by an N-methyl-D-aspartate receptor antagonist, AP5. *Nature* **319**, 774-  
2298 776.
- 2299 Morris, R. G., Garrud, P., Rawlins, J. N. and O'Keefe, J. (1982) Place navigation impaired in rats with  
2300 hippocampal lesions. *Nature* **297**, 681-683.
- 2301 Moser, E. I., Kropff, E. and Moser, M. B. (2008) Place Cells, Grid Cells, and the Brain's Spatial Representation  
2302 System. *Annu Rev Neurosci* **31**, 69-89.
- 2303 Moser, M. B., Rowland, D. C. and Moser, E. I. (2015) Place cells, grid cells, and memory. *Cold Spring Harb*  
2304 *Perspect Biol* **7**, a021808.
- 2305 Mozzachiodi, R. and Byrne, J. H. (2010) More than synaptic plasticity: role of nonsynaptic plasticity in learning  
2306 and memory. *Trends Neurosci* **33**, 17-26.
- 2307 Much, B., Wahl-Schott, C., Zong, X., Schneider, A., Baumann, L., Moosmang, S., Ludwig, A. and Biel, M. (2003)  
2308 Role of subunit heteromerization and N-linked glycosylation in the formation of functional  
2309 hyperpolarization-activated cyclic nucleotide-gated channels. *J Biol Chem* **278**, 43781-43786.
- 2310 Mukunda, C. L. and Narayanan, R. (2017) Degeneracy in the regulation of short-term plasticity and synaptic  
2311 filtering by presynaptic mechanisms. *J Physiol* **595**, 2611-2637.
- 2312 Mulkey, R. M. and Malenka, R. C. (1992) Mechanisms underlying induction of homosynaptic long-term  
2313 depression in area CA1 of the hippocampus. *Neuron* **9**, 967-975.
- 2314 Nagerl, U. V., Eberhorn, N., Cambridge, S. B. and Bonhoeffer, T. (2004) Bidirectional activity-dependent  
2315 morphological plasticity in hippocampal neurons. *Neuron* **44**, 759-767.
- 2316 Nakashiba, T., Young, J. Z., McHugh, T. J., Buhl, D. L. and Tonegawa, S. (2008) Transgenic inhibition of synaptic  
2317 transmission reveals role of CA3 output in hippocampal learning. *Science* **319**, 1260-1264.
- 2318 Nakazawa, K., McHugh, T. J., Wilson, M. A. and Tonegawa, S. (2004) NMDA receptors, place cells and  
2319 hippocampal spatial memory. *Nature reviews. Neuroscience* **5**, 361-372.
- 2320 Narayanan, R. and Chattarji, S. (2010) Computational analysis of the impact of chronic stress on intrinsic and  
2321 synaptic excitability in the hippocampus. *Journal of neurophysiology* **103**, 3070-3083.
- 2322 Narayanan, R., Dougherty, K. J. and Johnston, D. (2010) Calcium Store Depletion Induces Persistent  
2323 Perisomatic Increases in the Functional Density of h Channels in Hippocampal Pyramidal Neurons.  
2324 *Neuron* **68**, 921-935.
- 2325 Narayanan, R. and Johnston, D. (2007) Long-term potentiation in rat hippocampal neurons is accompanied by  
2326 spatially widespread changes in intrinsic oscillatory dynamics and excitability. *Neuron* **56**, 1061-  
2327 1075.
- 2328 Narayanan, R. and Johnston, D. (2008) The h channel mediates location dependence and plasticity of intrinsic  
2329 phase response in rat hippocampal neurons. *J Neurosci* **28**, 5846-5860.
- 2330 Narayanan, R. and Johnston, D. (2010) The h current is a candidate mechanism for regulating the sliding  
2331 modification threshold in a BCM-like synaptic learning rule. *Journal of neurophysiology* **104**, 1020-  
2332 1033.
- 2333 Narayanan, R. and Johnston, D. (2012) Functional maps within a single neuron. *Journal of neurophysiology*  
2334 **108**, 2343-2351.
- 2335 Nayfeh, A. H. and Balachandran, B. (1995) *Applied nonlinear dynamics: analytical, computational and*  
2336 *experimental methods*. Wiley-VCH Verlag GmbH: Weinheim, Germany.
- 2337 Nelson, S. B. and Turrigiano, G. G. (2008) Strength through diversity. *Neuron* **60**, 477-482.
- 2338 Ness, T. V., Remme, M. W. H. and Einevoll, G. T. (2016) Active subthreshold dendritic conductances shape the  
2339 local field potential. *J Physiol-London* **594**, 3809-3825.
- 2340 Neves, G., Cooke, S. F. and Bliss, T. V. (2008a) Synaptic plasticity, memory and the hippocampus: a neural  
2341 network approach to causality. *Nature reviews. Neuroscience* **9**, 65-75.
- 2342 Neves, S. R. and Iyengar, R. (2009) Models of spatially restricted biochemical reaction systems. *J Biol Chem*  
2343 **284**, 5445-5449.

- 2344 Neves, S. R., Tsokas, P., Sarkar, A., Grace, E. A., Rangamani, P., Taubenfeld, S. M., Alberini, C. M., Schaff, J. C.,  
2345 Blitzer, R. D., Moraru, I. and Iyengar, R. (2008b) Cell shape and negative links in regulatory motifs  
2346 together control spatial information flow in signaling networks. *Cell* **133**, 666-680.
- 2347 Nevian, T. and Sakmann, B. (2006) Spine Ca<sup>2+</sup> signaling in spike-timing-dependent plasticity. *J Neurosci* **26**,  
2348 11001-11013.
- 2349 Nicholson, E. and Kullmann, D. M. (2017) T-type calcium channels contribute to NMDA receptor independent  
2350 synaptic plasticity in hippocampal regular-spiking oriens-alveus interneurons. *J Physiol*.
- 2351 Nishiyama, M., Hong, K., Mikoshiba, K., Poo, M. M. and Kato, K. (2000) Calcium stores regulate the polarity and  
2352 input specificity of synaptic modification. *Nature* **408**, 584-588.
- 2353 Nolan, M. F., Malleret, G., Dudman, J. T., Buhl, D. L., Santoro, B., Gibbs, E., Vronskaya, S., Buzsaki, G., Siegelbaum,  
2354 S. A., Kandel, E. R. and Morozov, A. (2004) A behavioral role for dendritic integration: HCN1 channels  
2355 constrain spatial memory and plasticity at inputs to distal dendrites of CA1 pyramidal neurons. *Cell*  
2356 **119**, 719-732.
- 2357 Nusser, Z. (2009) Variability in the subcellular distribution of ion channels increases neuronal diversity.  
2358 *Trends Neurosci* **32**, 267-274.
- 2359 Nusser, Z. (2012) Differential subcellular distribution of ion channels and the diversity of neuronal function.  
2360 *Current opinion in neurobiology* **22**, 366-371.
- 2361 O'Keefe, J. (1976) Place units in the hippocampus of the freely moving rat. *Experimental neurology* **51**, 78-109.
- 2362 O'Keefe, J. (1979) A review of the hippocampal place cells. *Progress in neurobiology* **13**, 419-439.
- 2363 O'Keefe, J. and Burgess, N. (1999) Theta activity, virtual navigation and the human hippocampus. *Trends Cogn*  
2364 *Sci* **3**, 403-406.
- 2365 O'Keefe, J. and Burgess, N. (2005) Dual phase and rate coding in hippocampal place cells: theoretical  
2366 significance and relationship to entorhinal grid cells. *Hippocampus* **15**, 853-866.
- 2367 O'Keefe, J., Burgess, N., Donnett, J. G., Jeffery, K. J. and Maguire, E. A. (1998) Place cells, navigational accuracy,  
2368 and the human hippocampus. *Philos Trans R Soc Lond B Biol Sci* **353**, 1333-1340.
- 2369 O'Keefe, J. and Conway, D. H. (1978) Hippocampal place units in the freely moving rat: why they fire where  
2370 they fire. *Experimental brain research* **31**, 573-590.
- 2371 O'Keefe, J. and Recce, M. L. (1993) Phase relationship between hippocampal place units and the EEG theta  
2372 rhythm. *Hippocampus* **3**, 317-330.
- 2373 O'Leary, T. and Marder, E. (2014) Mapping neural activation onto behavior in an entire animal. *Science* **344**,  
2374 372-373.
- 2375 O'Leary, T., Williams, A. H., Caplan, J. S. and Marder, E. (2013) Correlations in ion channel expression emerge  
2376 from homeostatic tuning rules. *Proc Natl Acad Sci U S A* **110**, E2645-2654.
- 2377 O'Leary, T., Williams, A. H., Franci, A. and Marder, E. (2014) Cell types, network homeostasis, and pathological  
2378 compensation from a biologically plausible ion channel expression model. *Neuron* **82**, 809-821.
- 2379 Otchy, T. M., Wolff, S. B., Rhee, J. Y., Pehlevan, C., Kawai, R., Kempf, A., Gobes, S. M. and Olveczky, B. P. (2015)  
2380 Acute off-target effects of neural circuit manipulations. *Nature* **528**, 358-363.
- 2381 Otmakhov, N., Tao-Cheng, J. H., Carpenter, S., Asrican, B., Dosemeci, A., Reese, T. S. and Lisman, J. (2004)  
2382 Persistent accumulation of calcium/calmodulin-dependent protein kinase II in dendritic spines after  
2383 induction of NMDA receptor-dependent chemical long-term potentiation. *J Neurosci* **24**, 9324-9331.
- 2384 Otmakhova, N. A., Otmakhov, N., Mortenson, L. H. and Lisman, J. E. (2000) Inhibition of the cAMP pathway  
2385 decreases early long-term potentiation at CA1 hippocampal synapses. *J Neurosci* **20**, 4446-4451.
- 2386 Ouyang, Y., Kantor, D., Harris, K. M., Schuman, E. M. and Kennedy, M. B. (1997) Visualization of the distribution  
2387 of autophosphorylated calcium/calmodulin-dependent protein kinase II after tetanic stimulation in  
2388 the CA1 area of the hippocampus. *J Neurosci* **17**, 5416-5427.
- 2389 Ouyang, Y., Rosenstein, A., Kreiman, G., Schuman, E. M. and Kennedy, M. B. (1999) Tetanic stimulation leads to  
2390 increased accumulation of Ca(2+)/calmodulin-dependent protein kinase II via dendritic protein  
2391 synthesis in hippocampal neurons. *J Neurosci* **19**, 7823-7833.
- 2392 Pannasch, U. and Rouach, N. (2013) Emerging role for astroglial networks in information processing: from  
2393 synapse to behavior. *Trends Neurosci* **36**, 405-417.
- 2394 Panzeri, S., Harvey, C. D., Piasini, E., Latham, P. E. and Fellin, T. (2017) Cracking the Neural Code for Sensory  
2395 Perception by Combining Statistics, Intervention, and Behavior. *Neuron* **93**, 491-507.
- 2396 Paoletti, P., Bellone, C. and Zhou, Q. (2013) NMDA receptor subunit diversity: impact on receptor properties,  
2397 synaptic plasticity and disease. *Nature reviews. Neuroscience* **14**, 383-400.

- 2398 Parekh, A. B. (2008) Ca<sup>2+</sup> microdomains near plasma membrane Ca<sup>2+</sup> channels: impact on cell function. *J*  
2399 *Physiol* **586**, 3043-3054.
- 2400 Pascual, O., Casper, K. B., Kubera, C., Zhang, J., Revilla-Sanchez, R., Sul, J. Y., Takano, H., Moss, S. J., McCarthy, K.  
2401 and Haydon, P. G. (2005) Astrocytic purinergic signaling coordinates synaptic networks. *Science* **310**,  
2402 113-116.
- 2403 Pastalkova, E., Itskov, V., Amarasingham, A. and Buzsaki, G. (2008) Internally generated cell assembly  
2404 sequences in the rat hippocampus. *Science* **321**, 1322-1327.
- 2405 Perea, G. and Araque, A. (2005) Properties of synaptically evoked astrocyte calcium signal reveal synaptic  
2406 information processing by astrocytes. *J Neurosci* **25**, 2192-2203.
- 2407 Perea, G. and Araque, A. (2007) Astrocytes potentiate transmitter release at single hippocampal synapses.  
2408 *Science* **317**, 1083-1086.
- 2409 Perea, G., Gomez, R., Mederos, S., Covelo, A., Ballesteros, J. J., Schlosser, L., Hernandez-Vivanco, A., Martin-  
2410 Fernandez, M., Quintana, R., Rayan, A., Diez, A., Fuenzalida, M., Agarwal, A., Bergles, D. E., Bettler, B.,  
2411 Manahan-Vaughan, D., Martin, E. D., Kirchhoff, F. and Araque, A. (2016) Activity-dependent switch of  
2412 GABAergic inhibition into glutamatergic excitation in astrocyte-neuron networks. *eLife* **5**.
- 2413 Perea, G., Navarrete, M. and Araque, A. (2009) Tripartite synapses: astrocytes process and control synaptic  
2414 information. *Trends Neurosci* **32**, 421-431.
- 2415 Phillips, K. G., Hardingham, N. R. and Fox, K. (2008) Postsynaptic action potentials are required for nitric-  
2416 oxide-dependent long-term potentiation in CA1 neurons of adult GluR1 knock-out and wild-type  
2417 mice. *J Neurosci* **28**, 14031-14041.
- 2418 Philpot, B. D., Espinosa, J. S. and Bear, M. F. (2003) Evidence for altered NMDA receptor function as a basis for  
2419 metaplasticity in visual cortex. *J Neurosci* **23**, 5583-5588.
- 2420 Philpot, B. D., Sekhar, A. K., Shouval, H. Z. and Bear, M. F. (2001) Visual experience and deprivation  
2421 bidirectionally modify the composition and function of NMDA receptors in visual cortex. *Neuron* **29**,  
2422 157-169.
- 2423 Pike, F. G., Goddard, R. S., Suckling, J. M., Ganter, P., Kasthuri, N. and Paulsen, O. (2000) Distinct frequency  
2424 preferences of different types of rat hippocampal neurones in response to oscillatory input currents. *J*  
2425 *Physiol* **529 Pt 1**, 205-213.
- 2426 Podlaski, W. F., Seeholzer, A., Groschner, L. N., Miesenbock, G., Ranjan, R. and Vogels, T. P. (2017) Mapping the  
2427 function of neuronal ion channels in model and experiment. *eLife* **6**.
- 2428 Poolos, N. P. and Johnston, D. (2012) Dendritic ion channelopathy in acquired epilepsy. *Epilepsia* **53 Suppl 9**,  
2429 32-40.
- 2430 Prakriya, M. and Lewis, R. S. (2015) Store-Operated Calcium Channels. *Physiol Rev* **95**, 1383-1436.
- 2431 Prinz, A. A., Billimoria, C. P. and Marder, E. (2003) Alternative to hand-tuning conductance-based models:  
2432 construction and analysis of databases of model neurons. *Journal of neurophysiology* **90**, 3998-4015.
- 2433 Prinz, A. A., Bucher, D. and Marder, E. (2004) Similar network activity from disparate circuit parameters. *Nat*  
2434 *Neurosci* **7**, 1345-1352.
- 2435 Rajasethupathy, P., Sankaran, S., Marshel, J. H., Kim, C. K., Ferenczi, E., Lee, S. Y., Berndt, A., Ramakrishnan, C.,  
2436 Jaffe, A., Lo, M., Liston, C. and Deisseroth, K. (2015) Projections from neocortex mediate top-down  
2437 control of memory retrieval. *Nature* **526**, 653-659.
- 2438 Ranjan, R., Khazen, G., Gambazzi, L., Ramaswamy, S., Hill, S. L., Schurmann, F. and Markram, H. (2011)  
2439 Channelpedia: an integrative and interactive database for ion channels. *Frontiers in neuroinformatics*  
2440 **5**, 36.
- 2441 Rathour, R. K., Malik, R. and Narayanan, R. (2016) Transient potassium channels augment degeneracy in  
2442 hippocampal active dendritic spectral tuning. *Scientific reports* **6**, 24678.
- 2443 Rathour, R. K. and Narayanan, R. (2012a) Inactivating ion channels augment robustness of subthreshold  
2444 intrinsic response dynamics to parametric variability in hippocampal model neurons. *J Physiol* **590**,  
2445 5629-5652.
- 2446 Rathour, R. K. and Narayanan, R. (2012b) Influence fields: a quantitative framework for representation and  
2447 analysis of active dendrites. *Journal of neurophysiology* **107**, 2313-2334.
- 2448 Rathour, R. K. and Narayanan, R. (2014) Homeostasis of functional maps in active dendrites emerges in the  
2449 absence of individual channelostasis. *Proc Natl Acad Sci U S A* **111**, E1787-1796.
- 2450 Ratte, S., Hong, S., De Schutter, E. and Prescott, S. A. (2013) Impact of neuronal properties on network coding:  
2451 roles of spike initiation dynamics and robust synchrony transfer. *Neuron* **78**, 758-772.



- 2452 Raymond, C. R. (2007) LTP forms 1, 2 and 3: different mechanisms for the "long" in long-term potentiation.  
2453 *Trends Neurosci* **30**, 167-175.
- 2454 Regehr, W. G. (2012) Short-term presynaptic plasticity. *Cold Spring Harb Perspect Biol* **4**, a005702.
- 2455 Regehr, W. G., Carey, M. R. and Best, A. R. (2009) Activity-dependent regulation of synapses by retrograde  
2456 messengers. *Neuron* **63**, 154-170.
- 2457 Reimann, M. W., Anastassiou, C. A., Perin, R., Hill, S. L., Markram, H. and Koch, C. (2013) A biophysically  
2458 detailed model of neocortical local field potentials predicts the critical role of active membrane  
2459 currents. *Neuron* **79**, 375-390.
- 2460 Reisel, D., Bannerman, D. M., Schmitt, W. B., Deacon, R. M., Flint, J., Borchardt, T., Seeburg, P. H. and Rawlins, J.  
2461 N. (2002) Spatial memory dissociations in mice lacking GluR1. *Nat Neurosci* **5**, 868-873.
- 2462 Remy, S., Beck, H. and Yaari, Y. (2010) Plasticity of voltage-gated ion channels in pyramidal cell dendrites.  
2463 *Current opinion in neurobiology*.
- 2464 Reyes, A. D. (2003) Synchrony-dependent propagation of firing rate in iteratively constructed networks in  
2465 vitro. *Nat Neurosci* **6**, 593-599.
- 2466 Rizzuto, R. and Pozzan, T. (2006) Microdomains of intracellular Ca<sup>2+</sup>: molecular determinants and functional  
2467 consequences. *Physiol Rev* **86**, 369-408.
- 2468 Robinson, R. B. and Siegelbaum, S. A. (2003) Hyperpolarization-activated cation currents: from molecules to  
2469 physiological function. *Annual review of physiology* **65**, 453-480.
- 2470 Rosenkranz, J. A., Frick, A. and Johnston, D. (2009) Kinase-dependent modification of dendritic excitability  
2471 after long-term potentiation. *J Physiol* **587**, 115-125.
- 2472 Ross, W. N. (2012) Understanding calcium waves and sparks in central neurons. *Nature reviews. Neuroscience*  
2473 **13**, 157-168.
- 2474 Roth-Alpermann, C., Morris, R. G., Korte, M. and Bonhoeffer, T. (2006) Homeostatic shutdown of long-term  
2475 potentiation in the adult hippocampus. *Proc Natl Acad Sci U S A* **103**, 11039-11044.
- 2476 Royer, S., Zemelman, B. V., Losonczy, A., Kim, J., Chance, F., Magee, J. C. and Buzsaki, G. (2012) Control of  
2477 timing, rate and bursts of hippocampal place cells by dendritic and somatic inhibition. *Nat Neurosci*  
2478 **15**, 769-775.
- 2479 Sabatini, B. L., Oertner, T. G. and Svoboda, K. (2002) The life cycle of Ca<sup>2+</sup> ions in dendritic spines. *Neuron*  
2480 **33**, 439-452.
- 2481 Sakmann, B. (2017) From single cells and single columns to cortical networks: dendritic excitability,  
2482 coincidence detection and synaptic transmission in brain slices and brains. *Experimental physiology*  
2483 **102**, 489-521.
- 2484 Santoro, B., Chen, S., Luthi, A., Pavlidis, P., Shumyatsky, G. P., Tibbs, G. R. and Siegelbaum, S. A. (2000)  
2485 Molecular and functional heterogeneity of hyperpolarization-activated pacemaker channels in the  
2486 mouse CNS. *J Neurosci* **20**, 5264-5275.
- 2487 Santoro, B., Piskorowski, R. A., Pian, P., Hu, L., Liu, H. and Siegelbaum, S. A. (2009) TRIP8b splice variants form  
2488 a family of auxiliary subunits that regulate gating and trafficking of HCN channels in the brain.  
2489 *Neuron* **62**, 802-813.
- 2490 Santoro, B., Wainger, B. J. and Siegelbaum, S. A. (2004) Regulation of HCN channel surface expression by a  
2491 novel C-terminal protein-protein interaction. *J Neurosci* **24**, 10750-10762.
- 2492 Sarasso, S., Boly, M., Napolitani, M., Gosseries, O., Charland-Verville, V., Casarotto, S., Rosanova, M., Casali, A. G.,  
2493 Brichant, J. F., Boveroux, P., Rex, S., Tononi, G., Laureys, S. and Massimini, M. (2015) Consciousness  
2494 and Complexity during Unresponsiveness Induced by Propofol, Xenon, and Ketamine. *Current biology*  
2495 : *CB* **25**, 3099-3105.
- 2496 Schomburg, E. W., Anastassiou, C. A., Buzsaki, G. and Koch, C. (2012) The spiking component of oscillatory  
2497 extracellular potentials in the rat hippocampus. *J Neurosci* **32**, 11798-11811.
- 2498 Schreiner, C. E. and Winer, J. A. (2007) Auditory cortex mapmaking: principles, projections, and plasticity.  
2499 *Neuron* **56**, 356-365.
- 2500 Schulz, D. J., Goillard, J. M. and Marder, E. (2006) Variable channel expression in identified single and  
2501 electrically coupled neurons in different animals. *Nat Neurosci* **9**, 356-362.
- 2502 Schulz, D. J., Goillard, J. M. and Marder, E. E. (2007) Quantitative expression profiling of identified neurons  
2503 reveals cell-specific constraints on highly variable levels of gene expression. *Proc Natl Acad Sci U S A*  
2504 **104**, 13187-13191.
- 2505 Scoville, W. B. and Milner, B. (1957) Loss of recent memory after bilateral hippocampal lesions. *Journal of*  
2506 *neurology, neurosurgery, and psychiatry* **20**, 11-21.

- 2507 Sehgal, M., Song, C., Ehlers, V. L. and Moyer, J. R., Jr. (2013) Learning to learn - intrinsic plasticity as a  
2508 metaplasticity mechanism for memory formation. *Neurobiology of learning and memory* **105**, 186-  
2509 199.
- 2510 Shadlen, M. N. and Newsome, W. T. (1994) Noise, neural codes and cortical organization. *Current opinion in*  
2511 *neurobiology* **4**, 569-579.
- 2512 Shadlen, M. N. and Newsome, W. T. (1995) Is there a signal in the noise? *Current opinion in neurobiology* **5**,  
2513 248-250.
- 2514 Shadlen, M. N. and Newsome, W. T. (1998) The variable discharge of cortical neurons: implications for  
2515 connectivity, computation, and information coding. *J Neurosci* **18**, 3870-3896.
- 2516 Shah, M. M., Hammond, R. S. and Hoffman, D. A. (2010) Dendritic ion channel trafficking and plasticity. *Trends*  
2517 *Neurosci* **33**, 307-316.
- 2518 Sheffield, M. E. and Dombeck, D. A. (2015) Calcium transient prevalence across the dendritic arbour predicts  
2519 place field properties. *Nature* **517**, 200-204.
- 2520 Shouval, H. Z., Bear, M. F. and Cooper, L. N. (2002) A unified model of NMDA receptor-dependent bidirectional  
2521 synaptic plasticity. *Proc Natl Acad Sci U S A* **99**, 10831-10836.
- 2522 Siegel, M., Marder, E. and Abbott, L. F. (1994) Activity-dependent current distributions in model neurons. *Proc*  
2523 *Natl Acad Sci U S A* **91**, 11308-11312.
- 2524 Siegelbaum, S. A. (2000) Presynaptic facilitation by hyperpolarization-activated pacemaker channels. *Nat*  
2525 *Neurosci* **3**, 101-102.
- 2526 Sieghart, W. and Sperk, G. (2002) Subunit composition, distribution and function of GABA(A) receptor  
2527 subtypes. *Curr Top Med Chem* **2**, 795-816.
- 2528 Sieling, F., Bedecarrats, A., Simmers, J., Prinz, A. A. and Nargeot, R. (2014) Differential roles of nonsynaptic and  
2529 synaptic plasticity in operant reward learning-induced compulsive behavior. *Current biology : CB* **24**,  
2530 941-950.
- 2531 Sierra, A., Tremblay, M. E. and Wake, H. (2014) Never-resting microglia: physiological roles in the healthy  
2532 brain and pathological implications. *Front Cell Neurosci* **8**, 240.
- 2533 Singer, W., Engel, A. K., Kreiter, A. K., Munk, M. H., Neuenschwander, S. and Roelfsema, P. R. (1997) Neuronal  
2534 assemblies: necessity, signature and detectability. *Trends Cogn Sci* **1**, 252-261.
- 2535 Sinha, M. and Narayanan, R. (2015) HCN channels enhance spike phase coherence and regulate the phase of  
2536 spikes and LFPs in the theta-frequency range. *Proc Natl Acad Sci U S A* **112**, E2207-2216.
- 2537 Sjostrom, P. J. and Nelson, S. B. (2002) Spike timing, calcium signals and synaptic plasticity. *Current opinion in*  
2538 *neurobiology* **12**, 305-314.
- 2539 Sjostrom, P. J., Rancz, E. A., Roth, A. and Hausser, M. (2008) Dendritic excitability and synaptic plasticity.  
2540 *Physiol Rev* **88**, 769-840.
- 2541 Skaggs, W. E., McNaughton, B. L., Wilson, M. A. and Barnes, C. A. (1996) Theta phase precession in  
2542 hippocampal neuronal populations and the compression of temporal sequences. *Hippocampus* **6**,  
2543 149-172.
- 2544 Sloviter, R. S. (1991) Permanently altered hippocampal structure, excitability, and inhibition after  
2545 experimental status epilepticus in the rat: the "dormant basket cell" hypothesis and its possible  
2546 relevance to temporal lobe epilepsy. *Hippocampus* **1**, 41-66.
- 2547 Smith, M. A., Ellis-Davies, G. C. and Magee, J. C. (2003) Mechanism of the distance-dependent scaling of  
2548 Schaffer collateral synapses in rat CA1 pyramidal neurons. *J Physiol* **548**, 245-258.
- 2549 Soderling, T. R. and Derkach, V. A. (2000) Postsynaptic protein phosphorylation and LTP. *Trends Neurosci* **23**,  
2550 75-80.
- 2551 Softky, W. (1994) Sub-millisecond coincidence detection in active dendritic trees. *Neuroscience* **58**, 13-41.
- 2552 Softky, W. R. (1995) Simple codes versus efficient codes. *Current opinion in neurobiology* **5**, 239-247.
- 2553 Sporns, O., Tononi, G. and Edelman, G. M. (2000) Connectivity and complexity: the relationship between  
2554 neuroanatomy and brain dynamics. *Neural Netw* **13**, 909-922.
- 2555 Spruston, N. (2008) Pyramidal neurons: dendritic structure and synaptic integration. *Nature reviews.*  
2556 *Neuroscience* **9**, 206-221.
- 2557 Spruston, N., Jaffe, D. B. and Johnston, D. (1994) Dendritic attenuation of synaptic potentials and currents: the  
2558 role of passive membrane properties. *Trends Neurosci* **17**, 161-166.
- 2559 Spruston, N., Jaffe, D. B., Williams, S. H. and Johnston, D. (1993) Voltage- and space-clamp errors associated  
2560 with the measurement of electrotonically remote synaptic events. *Journal of neurophysiology* **70**,  
2561 781-802.

- 2562 Squire, L. R., Stark, C. E. and Clark, R. E. (2004) The medial temporal lobe. *Annu Rev Neurosci* **27**, 279-306.
- 2563 Srikanth, S. and Narayanan, R. (2015) Variability in State-Dependent Plasticity of Intrinsic Properties during
- 2564 Cell-Autonomous Self-Regulation of Calcium Homeostasis in Hippocampal Model Neurons. *eNeuro* **2**,
- 2565 e0053-0015.2015.
- 2566 Srivastava, K. H., Holmes, C. M., Vellema, M., Pack, A. R., Elemans, C. P., Nemenman, I. and Sober, S. J. (2017)
- 2567 Motor control by precisely timed spike patterns. *Proc Natl Acad Sci U S A* **114**, 1171-1176.
- 2568 Staubli, U. and Lynch, G. (1990) Stable depression of potentiated synaptic responses in the hippocampus with
- 2569 1-5 Hz stimulation. *Brain Res* **513**, 113-118.
- 2570 Stelling, J., Sauer, U., Szallasi, Z., Doyle, F. J., 3rd and Doyle, J. (2004) Robustness of cellular functions. *Cell* **118**,
- 2571 675-685.
- 2572 Stevens, C. F. (1998) A million dollar question: does LTP = memory? *Neuron* **20**, 1-2.
- 2573 Strogatz, S. H. (2014) *Nonlinear Dynamics and Chaos: With Applications to Physics, Biology, Chemistry and*
- 2574 *Engineering*. Westview Press: Boulder, CO.
- 2575 Sun, W., Maffie, J. K., Lin, L., Petralia, R. S., Rudy, B. and Hoffman, D. A. (2011) DPP6 establishes the A-type K(+)
- 2576 current gradient critical for the regulation of dendritic excitability in CA1 hippocampal neurons.
- 2577 *Neuron* **71**, 1102-1115.
- 2578 Sunkin, S. M., Ng, L., Lau, C., Dolbeare, T., Gilbert, T. L., Thompson, C. L., Hawrylycz, M. and Dang, C. (2013)
- 2579 Allen Brain Atlas: an integrated spatio-temporal portal for exploring the central nervous system.
- 2580 *Nucleic acids research* **41**, D996-D1008.
- 2581 Takahashi, H. and Magee, J. C. (2009) Pathway interactions and synaptic plasticity in the dendritic tuft regions
- 2582 of CA1 pyramidal neurons. *Neuron* **62**, 102-111.
- 2583 Taxisidis, J., Anastassiou, C. A., Diba, K. and Koch, C. (2015) Local Field Potentials Encode Place Cell Ensemble
- 2584 Activation during Hippocampal Sharp Wave Ripples. *Neuron* **87**, 590-604.
- 2585 Taylor, A. L., Goillaud, J. M. and Marder, E. (2009) How multiple conductances determine electrophysiological
- 2586 properties in a multicompartment model. *J Neurosci* **29**, 5573-5586.
- 2587 Thattai, M. and van Oudenaarden, A. (2001) Intrinsic noise in gene regulatory networks. *Proceedings of the*
- 2588 *National Academy of Sciences of the United States of America* **98**, 8614-8619.
- 2589 Titley, H. K., Brunel, N. and Hansel, C. (2017) Toward a Neurocentric View of Learning. *Neuron* **95**, 19-32.
- 2590 Tobin, A. E., Van Hooser, S. D. and Calabrese, R. L. (2006) Creation and reduction of a morphologically detailed
- 2591 model of a leech heart interneuron. *Journal of neurophysiology* **96**, 2107-2120.
- 2592 Tonnesen, J., Katona, G., Rozsa, B. and Nagerl, U. V. (2014) Spine neck plasticity regulates
- 2593 compartmentalization of synapses. *Nat Neurosci* **17**, 678-685.
- 2594 Tononi, G. and Cirelli, C. (2006) Sleep function and synaptic homeostasis. *Sleep medicine reviews* **10**, 49-62.
- 2595 Tononi, G. and Edelman, G. M. (1998) Consciousness and complexity. *Science* **282**, 1846-1851.
- 2596 Tononi, G., Edelman, G. M. and Sporns, O. (1998) Complexity and coherency: integrating information in the
- 2597 brain. *Trends Cogn Sci* **2**, 474-484.
- 2598 Tononi, G., Sporns, O. and Edelman, G. M. (1994) A measure for brain complexity: relating functional
- 2599 segregation and integration in the nervous system. *Proc Natl Acad Sci U S A* **91**, 5033-5037.
- 2600 Tononi, G., Sporns, O. and Edelman, G. M. (1996) A complexity measure for selective matching of signals by
- 2601 the brain. *Proc Natl Acad Sci U S A* **93**, 3422-3427.
- 2602 Tononi, G., Sporns, O. and Edelman, G. M. (1999) Measures of degeneracy and redundancy in biological
- 2603 networks. *Proc Natl Acad Sci U S A* **96**, 3257-3262.
- 2604 Traub, R. D., Miles, R. and Wong, R. K. (1989) Model of the origin of rhythmic population oscillations in the
- 2605 hippocampal slice. *Science* **243**, 1319-1325.
- 2606 Triesch, J. (2007) Synergies between intrinsic and synaptic plasticity mechanisms. *Neural Comput* **19**, 885-
- 2607 909.
- 2608 Trimmer, J. S. and Rhodes, K. J. (2004) Localization of voltage-gated ion channels in mammalian brain. *Annual*
- 2609 *review of physiology* **66**, 477-519.
- 2610 Tripathy, S. J., Savitskaya, J., Burton, S. D., Urban, N. N. and Gerkin, R. C. (2014) NeuroElectro: a window to the
- 2611 world's neuron electrophysiology data. *Frontiers in neuroinformatics* **8**, 40.
- 2612 Tsien, J. Z., Huerta, P. T. and Tonegawa, S. (1996) The essential role of hippocampal CA1 NMDA receptor-
- 2613 dependent synaptic plasticity in spatial memory. *Cell* **87**, 1327-1338.
- 2614 Tsokas, P., Hsieh, C., Yao, Y., Lesburgueres, E., Wallace, E. J., Tcherepanov, A., Jothianandan, D., Hartley, B. R.,
- 2615 Pan, L., Rivard, B., Farese, R. V., Sajan, M. P., Bergold, P. J., Hernandez, A. I., Cottrell, J. E., Shouval, H. Z.,

- 2616 Fenton, A. A. and Sacktor, T. C. (2016) Compensation for PKMzeta in long-term potentiation and  
2617 spatial long-term memory in mutant mice. *eLife* **5**.
- 2618 Turrigiano, G. (2007) Homeostatic signaling: the positive side of negative feedback. *Current opinion in*  
2619 *neurobiology* **17**, 318-324.
- 2620 Turrigiano, G. (2011) Too many cooks? Intrinsic and synaptic homeostatic mechanisms in cortical circuit  
2621 refinement. *Annu Rev Neurosci* **34**, 89-103.
- 2622 Turrigiano, G., Abbott, L. F. and Marder, E. (1994) Activity-dependent changes in the intrinsic properties of  
2623 cultured neurons. *Science* **264**, 974-977.
- 2624 Turrigiano, G. G. (1999) Homeostatic plasticity in neuronal networks: the more things change, the more they  
2625 stay the same. *Trends Neurosci* **22**, 221-227.
- 2626 Turrigiano, G. G. (2008) The self-tuning neuron: synaptic scaling of excitatory synapses. *Cell* **135**, 422-435.
- 2627 Turrigiano, G. G. (2017) The dialectic of Hebb and homeostasis. *Philos Trans R Soc Lond B Biol Sci* **372**.
- 2628 Turrigiano, G. G. and Nelson, S. B. (2000) Hebb and homeostasis in neuronal plasticity. *Current opinion in*  
2629 *neurobiology* **10**, 358-364.
- 2630 Turrigiano, G. G. and Nelson, S. B. (2004) Homeostatic plasticity in the developing nervous system. *Nature*  
2631 *reviews. Neuroscience* **5**, 97-107.
- 2632 Tytell, E. D., Holmes, P. and Cohen, A. H. (2011) Spikes alone do not behavior make: why neuroscience needs  
2633 biomechanics. *Current opinion in neurobiology* **21**, 816-822.
- 2634 Ulens, C. and Siegelbaum, S. A. (2003) Regulation of hyperpolarization-activated HCN channels by cAMP  
2635 through a gating switch in binding domain symmetry. *Neuron* **40**, 959-970.
- 2636 Ulens, C. and Tytgat, J. (2001) Functional heteromerization of HCN1 and HCN2 pacemaker channels. *J Biol*  
2637 *Chem* **276**, 6069-6072.
- 2638 Vacher, H., Mohapatra, D. P. and Trimmer, J. S. (2008) Localization and targeting of voltage-dependent ion  
2639 channels in mammalian central neurons. *Physiol Rev* **88**, 1407-1447.
- 2640 Vacher, H. and Trimmer, J. S. (2011) Diverse roles for auxiliary subunits in phosphorylation-dependent  
2641 regulation of mammalian brain voltage-gated potassium channels. *Pflugers Archiv : European journal*  
2642 *of physiology* **462**, 631-643.
- 2643 van Rossum, M. C., Bi, G. Q. and Turrigiano, G. G. (2000) Stable Hebbian learning from spike timing-dependent  
2644 plasticity. *J Neurosci* **20**, 8812-8821.
- 2645 Varzi, A. (2016) Mereology. In: *The Stanford Encyclopedia of Philosophy*. Ed. E. N. Zalta. Metaphysics Research  
2646 Lab, Stanford University: Pala Alto, CA.
- 2647 Verkhratsky, A. (2002) The endoplasmic reticulum and neuronal calcium signalling. *Cell Calcium* **32**, 393-404.
- 2648 Verkhratsky, A. and Steinhauser, C. (2000) Ion channels in glial cells. *Brain Res Brain Res Rev* **32**, 380-412.
- 2649 Vetere, G., Kenney, J. W., Tran, L. M., Xia, F., Steadman, P. E., Parkinson, J., Josselyn, S. A. and Frankland, P. W.  
2650 (2017) Chemogenetic Interrogation of a Brain-wide Fear Memory Network in Mice. *Neuron* **94**, 363-  
2651 374 e364.
- 2652 Vogelstein, J. T., Park, Y., Ohyama, T., Kerr, R. A., Truman, J. W., Priebe, C. E. and Zlatic, M. (2014) Discovery of  
2653 brainwide neural-behavioral maps via multiscale unsupervised structure learning. *Science* **344**, 386-  
2654 392.
- 2655 Volterra, A., Liaudet, N. and Savtchouk, I. (2014) Astrocyte Ca<sup>2+</sup>(+) signalling: an unexpected complexity.  
2656 *Nature reviews. Neuroscience* **15**, 327-335.
- 2657 Wagner, A. (2005) Distributed robustness versus redundancy as causes of mutational robustness. *Bioessays*  
2658 **27**, 176-188.
- 2659 Wagner, A. (2008) Robustness and evolvability: a paradox resolved. *Proceedings. Biological sciences / The*  
2660 *Royal Society* **275**, 91-100.
- 2661 Wang, H. and Wagner, J. J. (1999) Priming-induced shift in synaptic plasticity in the rat hippocampus. *Journal*  
2662 *of neurophysiology* **82**, 2024-2028.
- 2663 Wang, X. J. (2010) Neurophysiological and computational principles of cortical rhythms in cognition. *Physiol*  
2664 *Rev* **90**, 1195-1268.
- 2665 Wang, X. J. and Buzsaki, G. (1996) Gamma oscillation by synaptic inhibition in a hippocampal interneuronal  
2666 network model. *J Neurosci* **16**, 6402-6413.
- 2667 Wang, Z., Xu, N., Wu, C., Duan, S. and Poo, M. (2003) Bidirectional changes in spatial dendritic integration  
2668 accompanying long-term synaptic modifications. *Neuron* **37**, 463-472.

- 2669 Watanabe, S., Hoffman, D., Migliore, M. and Johnston, D. (2002) Dendritic K<sup>+</sup> channels contribute to spike-  
2670 timing dependent long-term potentiation in hippocampal pyramidal neurons. *Proc Natl Acad Sci USA*  
2671 **99**, 8366-8371.
- 2672 Weaver, C. M. and Wearne, S. L. (2008) Neuronal firing sensitivity to morphologic and active membrane  
2673 parameters. *PLoS computational biology* **4**, e11.
- 2674 Weng, G., Bhalla, U. S. and Iyengar, R. (1999) Complexity in biological signaling systems. *Science* **284**, 92-96.
- 2675 Wenthold, R. J., Prybylowski, K., Standley, S., Sans, N. and Petralia, R. S. (2003) Trafficking of NMDA receptors.  
2676 *Annual review of pharmacology and toxicology* **43**, 335-358.
- 2677 Whitacre, J. and Bender, A. (2010) Degeneracy: a design principle for achieving robustness and evolvability. *J*  
2678 *Theor Biol* **263**, 143-153.
- 2679 Whitacre, J. M. (2010) Degeneracy: a link between evolvability, robustness and complexity in biological  
2680 systems. *Theoretical biology & medical modelling* **7**, 6.
- 2681 White, L. E. and Fitzpatrick, D. (2007) Vision and cortical map development. *Neuron* **56**, 327-338.
- 2682 Whitlock, J. R., Heynen, A. J., Shuler, M. G. and Bear, M. F. (2006) Learning induces long-term potentiation in  
2683 the hippocampus. *Science* **313**, 1093-1097.
- 2684 Wills, T. J., Lever, C., Cacucci, F., Burgess, N. and O'Keefe, J. (2005) Attractor dynamics in the hippocampal  
2685 representation of the local environment. *Science* **308**, 873-876.
- 2686 Wilson, M. A. and McNaughton, B. L. (1994) Reactivation of hippocampal ensemble memories during sleep.  
2687 *Science* **265**, 676-679.
- 2688 Woo, N. H., Duffy, S. N., Abel, T. and Nguyen, P. V. (2003) Temporal spacing of synaptic stimulation critically  
2689 modulates the dependence of LTP on cyclic AMP-dependent protein kinase. *Hippocampus* **13**, 293-  
2690 300.
- 2691 Yasuda, R., Nimchinsky, E. A., Scheuss, V., Pologruto, T. A., Oertner, T. G., Sabatini, B. L. and Svoboda, K. (2004)  
2692 Imaging calcium concentration dynamics in small neuronal compartments. *Science's STKE : signal*  
2693 *transduction knowledge environment* **2004**, pl5.
- 2694 Yeung, L. C., Shouval, H. Z., Blais, B. S. and Cooper, L. N. (2004) Synaptic homeostasis and input selectivity  
2695 follow from a calcium-dependent plasticity model. *Proc Natl Acad Sci U S A* **101**, 14943-14948.
- 2696 Yizhar, O., Fenno, L. E., Prigge, M., Schneider, F., Davidson, T. J., O'Shea, D. J., Sohal, V. S., Goshen, I., Finkelstein,  
2697 J., Paz, J. T., Stehfest, K., Fudim, R., Ramakrishnan, C., Huguenard, J. R., Hegemann, P. and Deisseroth, K.  
2698 (2011) Neocortical excitation/inhibition balance in information processing and social dysfunction.  
2699 *Nature* **477**, 171-178.
- 2700 Ylinen, A., Bragin, A., Nadasdy, Z., Jando, G., Szabo, I., Sik, A. and Buzsaki, G. (1995a) Sharp wave-associated  
2701 high-frequency oscillation (200 Hz) in the intact hippocampus: network and intracellular  
2702 mechanisms. *J Neurosci* **15**, 30-46.
- 2703 Ylinen, A., Soltesz, I., Bragin, A., Penttonen, M., Sik, A. and Buzsaki, G. (1995b) Intracellular correlates of  
2704 hippocampal theta rhythm in identified pyramidal cells, granule cells, and basket cells. *Hippocampus*  
2705 **5**, 78-90.
- 2706 Yu, R. C., Pesce, C. G., Colman-Lerner, A., Lok, L., Pincus, D., Serra, E., Holl, M., Benjamin, K., Gordon, A. and  
2707 Brent, R. (2008) Negative feedback that improves information transmission in yeast signalling.  
2708 *Nature* **456**, 755-761.
- 2709 Yuan, L.-L., Adams, J. P., Swank, M., Sweatt, J. D. and Johnston, D. (2002) Protein kinase modulation of  
2710 dendritic K<sup>+</sup> channels in hippocampus involves a mitogen-activated protein kinase pathway. *J*  
2711 *Neurosci* **22**, 4860-4868.
- 2712 Yuste, R. and Bonhoeffer, T. (2001) Morphological changes in dendritic spines associated with long-term  
2713 synaptic plasticity. *Annu Rev Neurosci* **24**, 1071-1089.
- 2714 Zamanillo, D., Sprengel, R., Hvalby, O., Jensen, V., Burnashev, N., Rozov, A., Kaiser, K. M., Koster, H. J., Borchardt,  
2715 T., Worley, P., Lubke, J., Frotscher, M., Kelly, P. H., Sommer, B., Andersen, P., Seeburg, P. H. and  
2716 Sakmann, B. (1999) Importance of AMPA receptors for hippocampal synaptic plasticity but not for  
2717 spatial learning. *Science* **284**, 1805-1811.
- 2718 Zemankovics, R., Kali, S., Paulsen, O., Freund, T. F. and Hajos, N. (2010) Differences in subthreshold resonance  
2719 of hippocampal pyramidal cells and interneurons: the role of h-current and passive membrane  
2720 characteristics. *J Physiol* **588**, 2109-2132.
- 2721 Zenke, F., Gerstner, W. and Ganguli, S. (2017) The temporal paradox of Hebbian learning and homeostatic  
2722 plasticity. *Current opinion in neurobiology* **43**, 166-176.

- 2723 Zhang, W. and Linden, D. J. (2003) The other side of the engram: experience-driven changes in neuronal  
2724 intrinsic excitability. *Nature reviews. Neuroscience* **4**, 885-900.
- 2725 Zolles, G., Wenzel, D., Bildl, W., Schulte, U., Hofmann, A., Muller, C. S., Thumfart, J. O., Vlachos, A., Deller, T.,  
2726 Pfeifer, A., Fleischmann, B. K., Roeper, J., Fakler, B. and Klocker, N. (2009) Association with the  
2727 auxiliary subunit PEX5R/Trip8b controls responsiveness of HCN channels to cAMP and adrenergic  
2728 stimulation. *Neuron* **62**, 814-825.
- 2729 Zorec, R., Araque, A., Carmignoto, G., Haydon, P. G., Verkhratsky, A. and Parpura, V. (2012) Astroglial  
2730 excitability and gliotransmission: an appraisal of Ca<sup>2+</sup> as a signalling route. *ASN neuro* **4**.
- 2731 Zucker, R. S. (1989) Short-term synaptic plasticity. *Annu Rev Neurosci* **12**, 13-31.
- 2732 Zucker, R. S. (1999) Calcium- and activity-dependent synaptic plasticity. *Current opinion in neurobiology* **9**,  
2733 305-313.
- 2734 Zucker, R. S. and Regehr, W. G. (2002) Short-term synaptic plasticity. *Annual review of physiology* **64**, 355-405.
- 2735
- 2736

2737 **FIGURE LEGENDS**

2738

2739 **Figure 1. Degeneracy in the emergence of a function and its robustness to external**

2740 **perturbation across multiple scales of analysis.** (A) Representation of multiple scales of

2741 analysis in neuroscience. The size (large and small) of the scale of analysis is representative of

2742 size of the constitutive components in that scale (Churchland and Sejnowski, 1992; Churchland

2743 and Sejnowski, 1988). (B) Disparate combinations of parameters in a specified scale of analysis

2744 could result in similar function in a larger scale of analysis. Each red circle in the smaller scale of

2745 analysis represents a combination of parameters that results in a specified function in large

2746 analysis scale, also represented by red circles there. The enclosing black circle in the larger scale

2747 represents experimentally observed variability in the function that is being assessed. On the other

2748 hand, the black circle in the smaller scale illustrates that robust functionality in the larger scale

2749 could be achieved even with small local perturbations in the parametric space. Larger

2750 perturbations beyond the black circle, however, would not yield robust functionality. The

2751 presence of multiple clusters of red circles in the smaller scale represents degeneracy, where

2752 similar functionality is achieved if parameters are within any of those multiple clusters.

2753 (C) Disparate combinations of parameters could compensate for functional impairment caused

2754 by external perturbation. *Left*, External perturbation results in the observed function in the larger

2755 scale of analysis switching from the baseline (red circles) to a perturbed state (blue circles).

2756 *Center*, In response, parameters in a smaller scale of analysis could undergo any of the several

2757 transitions, represented by green arrows, towards achieving functional homeostasis. Red circles

2758 represents the valid baseline parameters before perturbation, and green circles represent the state

2759 after the homeostatic response. *Right*, As a consequence of this homeostatic response involving

2760 any of the several disparate combinations of parameters, the system returns back to its baseline  
2761 functionality (red circles).

2762  
2763 **Figure 2. Qualitative vs. quantitative degeneracy.** (A) Qualitative degeneracy, where the

2764 functional goal on which degeneracy is assessed is the expression of resonance, which could be  
2765 achieved by the presence of one or more resonating conductances. Depicted are voltage traces

2766 obtained in response to a chirp current injection into neurons containing none, one or two  
2767 resonating conductances. The hyperpolarization activated cyclic-nucleotide gated (HCN) and *T*-

2768 type calcium (CaT) are employed as the two example resonating conductances. In a neuron that  
2769 expresses two or more resonating conductances (at sufficient densities), resonance ceases to

2770 express only when both resonating conductances are eliminated. The impedance amplitude (left  
2771 bottom) and phase profiles (right bottom) are also shown for each color-matched chirp response.

2772 It may be noted that resonance in the amplitude profile and lead in the phase profile are observed  
2773 when resonating conductances are expressed individually or together, and synergistically interact

2774 when they are expressed together. (B) Quantitative degeneracy, where the functional goal on  
2775 which degeneracy is assessed is the ability to specify a target value of resonance frequency in the

2776 neuron, when a resonating conductance is expressed. Shown are some examples of the disparate  
2777 possible routes to achieve quantitative changes to resonance frequency. One set of possibilities

2778 involves altering the properties of the channel mediating resonance (taken to be HCN in this  
2779 example) such as its density ( $\Delta g_{\text{HCN}}$ ), its gating properties (*e.g.*, half-maximal activation voltage,

2780  $\Delta V_{1/2}$ ) or its kinetics (*e.g.*, activation time constant,  $\Delta \tau_{\text{HCN}}$ ). The other set involves introducing  
2781 (*e.g.*, *T*-type calcium channels,  $\Delta g_{\text{CaT}}$  or *A*-type potassium channels,  $\Delta g_{\text{KA}}$ ) or altering (*e.g.*,

2782 change in leak channels  $\Delta g_{\text{leak}}$ ) other channels that modulate the resonance mediated by the  
2783 resonating conductance (whose removal would abolish resonance,  $-g_{\text{HCN}}$ , unless compensated by



2784 the expression of another resonating conductance). (C) In different neurons, the contribution of  
2785 different channels to any measurement (shown here is resonance frequency,  $f_R$ ) could be  
2786 variable. The size of each sphere scales with the quantum of contribution of a given channel (one  
2787 among HCN, CaT, KA and leak) to  $f_R$  in a given neuron (11 neurons are depicted). Traces  
2788 presented here and associated conclusions are drawn from previous studies (Hutcheon and  
2789 Yarom, 2000; Narayanan and Johnston, 2007, 2008; Rathour *et al.*, 2016; Rathour and  
2790 Narayanan, 2012a).

2791  
2792 **Figure 3. Dissociation between different forms of homeostasis.** (A) In different neurons, the  
2793 contribution of different channels to different measurements (shown here are resonance  
2794 frequency,  $f_R$ , and input resistance,  $R_{in}$ ) is differential and variable. The size of each sphere scales  
2795 with the quantum of contribution of a given channel (one among HCN, CaT, KA and leak) to  $f_R$   
2796 in a given neuron (11 neurons are depicted). It may be noted that in any given neuron, it is not  
2797 necessary that the contributions of any given channel to  $f_R$  and  $R_{in}$  need not be equal, even when  
2798 both  $f_R$  and  $R_{in}$  are similar across all neurons. Cartoon illustrations are derived from data  
2799 presented in previous studies (Rathour *et al.*, 2016; Rathour and Narayanan, 2012a, 2014;  
2800 Srikanth and Narayanan, 2015). (B) Although baseline homeostasis is efficaciously maintained  
2801 in five different neurons, their responses to an identical perturbation need not necessarily be  
2802 identical or even similar. The perturbation could be a plasticity-inducing stimulus driven by  
2803 behavioral experience or by pathological conditions. Cartoon illustration was derived from  
2804 analyses presented in previous studies (Anirudhan and Narayanan, 2015; O'Leary *et al.*, 2014;  
2805 Srikanth and Narayanan, 2015).

2806  
2807

2808 **Figure 4. Disparate activity-dependent protocols have been employed for the induction of**  
2809 **long-term potentiation or depression in hippocampal synapses.** (A–B) Disparate activity-  
2810 dependent induction protocols yield long-term potentiation (A) or depression (B) in Schaffer  
2811 collateral synapses connecting CA3 pyramidal neurons to CA1 pyramidal neurons. Individual  
2812 panels depict cartoon illustrations of induction protocols employed in previous studies (Bi and  
2813 Poo, 1998; Christie *et al.*, 1996; Dudek and Bear, 1992; Huber *et al.*, 2000; Larson *et al.*, 1986;  
2814 Magee and Johnston, 1997). AP: action potential; STIM: stimulation leading to postsynaptic  
2815 potentials; IPI: inter pulse interval. A subset of similar or additional protocols that have been  
2816 employed in the induction of potentiation or depression in hippocampal synapses may be found  
2817 here: (Basu *et al.*, 2016; Bittner *et al.*, 2015; Bittner *et al.*, 2017; Bliss and Collingridge, 1993;  
2818 Bliss and Gardner-Medwin, 1973; Bliss and Lomo, 1973; Chevaleyre *et al.*, 2006; Christie *et al.*,  
2819 1994; Dan and Poo, 2006; Dudek and Bear, 1992, 1993; Dudman *et al.*, 2007; Larkman and  
2820 Jack, 1995; Lynch *et al.*, 1983; Lynch *et al.*, 1977; Malenka *et al.*, 1992; Mulkey and Malenka,  
2821 1992; Raymond, 2007; Regehr *et al.*, 2009; Staubli and Lynch, 1990; Takahashi and Magee,  
2822 2009).

2823  
2824 **Figure 5. Disparate cellular and molecular mechanisms govern the strength and kinetics of**  
2825 **cytosolic calcium influx.** (A) Different protocols have been employed for the induction of LTP  
2826 in hippocampal synapses. Whereas references for the first four of these protocols are provided in  
2827 Fig. 4, the last three are derived from protocols in these references (Basu *et al.*, 2016; Bittner *et*  
2828 *al.*, 2015; Bittner *et al.*, 2017; Dudman *et al.*, 2007; Hanse and Gustafsson, 1994; Huang and  
2829 Malenka, 1993; Huber *et al.*, 1995; Lin *et al.*, 2008; Otmakhov *et al.*, 2004; Roth-Alpermann *et*  
2830 *al.*, 2006; Takahashi and Magee, 2009). (B) Protocols shown in (A) typically elicit postsynaptic  
2831 calcium influx through synergistic interactions between disparate constitutive components.

2832 Although only postsynaptic components are depicted here, it should be noted that presynaptic  
2833 components, including excitability-, calcium- and release-regulating mechanisms, also would  
2834 control the postsynaptic calcium influx through regulation of release dynamics and short-term  
2835 plasticity. Additionally induction could also be presynaptic. (C) In different neurons, the  
2836 contribution of different components to achieve similar strength and kinetics of cytosolic calcium  
2837 influx could be variable. The size of each sphere scales with the quantum of contribution of a  
2838 given component to cytosolic calcium influx in a given neuron (11 neurons are depicted).  
2839 Cartoon representations depicted here are drawn from conclusions arrived in previous studies  
2840 (Anirudhan and Narayanan, 2015; Mukunda and Narayanan, 2017).

2841  
2842 **Figure 6. Disparate signaling cascades with diverse downstream targets are activated**  
2843 **following postsynaptic calcium elevation.** Depicted is a tripartite synapse that includes a  
2844 presynaptic terminal, a postsynaptic structure and a glial cell. Following the influx of calcium  
2845 through disparate sources (see Fig. 5; shown here is only NMDAR for simplicity), several pre-  
2846 and post-synaptic signaling cascades could be activated with very different downstream targets.  
2847 Retrograde messengers are responsible for intimating the presynaptic terminal about postsynaptic  
2848 calcium elevation. Illustration incorporates conclusions from previous studies (Bhalla, 2014;  
2849 Bhalla and Iyengar, 1999; Kotaleski and Blackwell, 2010; Manninen *et al.*, 2010; Regehr, 2012;  
2850 Regehr *et al.*, 2009).

2851  
2852 **Figure 7. Disparate mechanisms mediate the expression of short- and long-term synaptic**  
2853 **plasticity.** *Left*, Depicted is a tripartite synapse that includes a presynaptic terminal, a  
2854 postsynaptic structure and a glial cell. *Right*, Several pre- and post-synaptic mechanisms regulate  
2855 synaptic strength, and independent or concomitant long-term changes in any of these

2856 components would result in the expression synaptic plasticity. Plasticity is known to potentially  
2857 span all these components and more (Kim and Linden, 2007).

2858  
2859 **Figure 8. Disparate forms of synaptic and non-synaptic plasticity are induced through the**  
2860 **activation of different signaling cascades triggered by calcium influx regulated by several**  
2861 **mechanisms, resulting in multiscale degeneracy in plasticity induction through expression.**

2862 *Left*, Synergistic interactions between several components results in cytosolic calcium influx  
2863 following plasticity induction through activity protocols or behavioral experience of pathological  
2864 insults. *Center*, Disparate signaling cascades with diverse downstream targets are activated  
2865 following postsynaptic calcium elevation. *Right*, The activation of signaling cascades and their  
2866 impact on their targets are not just limited to synaptic components, but span a large span of  
2867 neuronal and network components. Several forms of synaptic and non-synaptic plasticity express  
2868 concomitantly in response to the same protocols or perturbations (Beck and Yaari, 2008;  
2869 Johnston *et al.*, 2016; Kim and Linden, 2007; Narayanan and Johnston, 2012).

2870  
2871 **Figure 9. Disparate mechanisms with distinct time courses could mediate stability in**  
2872 **synaptic learning through metaplasticity.** (A–B) Hebbian synaptic plasticity is inherently  
2873 unstable leading to runaway excitation in synaptic structure (A; orange boxes). The Bienenstock-  
2874 Cooper–Munro (BCM) rule envisages the existence of a sliding threshold mechanism (B) which  
2875 provides a negative feedback loop (B; green boxes) that would preclude runaway excitation by  
2876 altering the rules for plasticity. Alteration of plasticity rules has been referred to as metaplasticity  
2877 in the literature (Abraham and Bear, 1996; Bienenstock *et al.*, 1982; Cooper and Bear, 2012). (C)  
2878 Bidirectional metaplasticity could be mediated by any of the several mechanisms discussed in  
2879 Fig. 7–8 with reference to the expression of synaptic and non-synaptic plasticity. (D–E) Similar

2880 plasticity profiles (D) could be achieved through disparate combinations of constituent parameter  
2881 values (E). Cartoon illustrations are derived from conclusions drawn in previous studies  
2882 (Abraham, 2008; Abraham and Bear, 1996; Anirudhan and Narayanan, 2015; Hulme *et al.*, 2013;  
2883 Sehgal *et al.*, 2013).  
2884

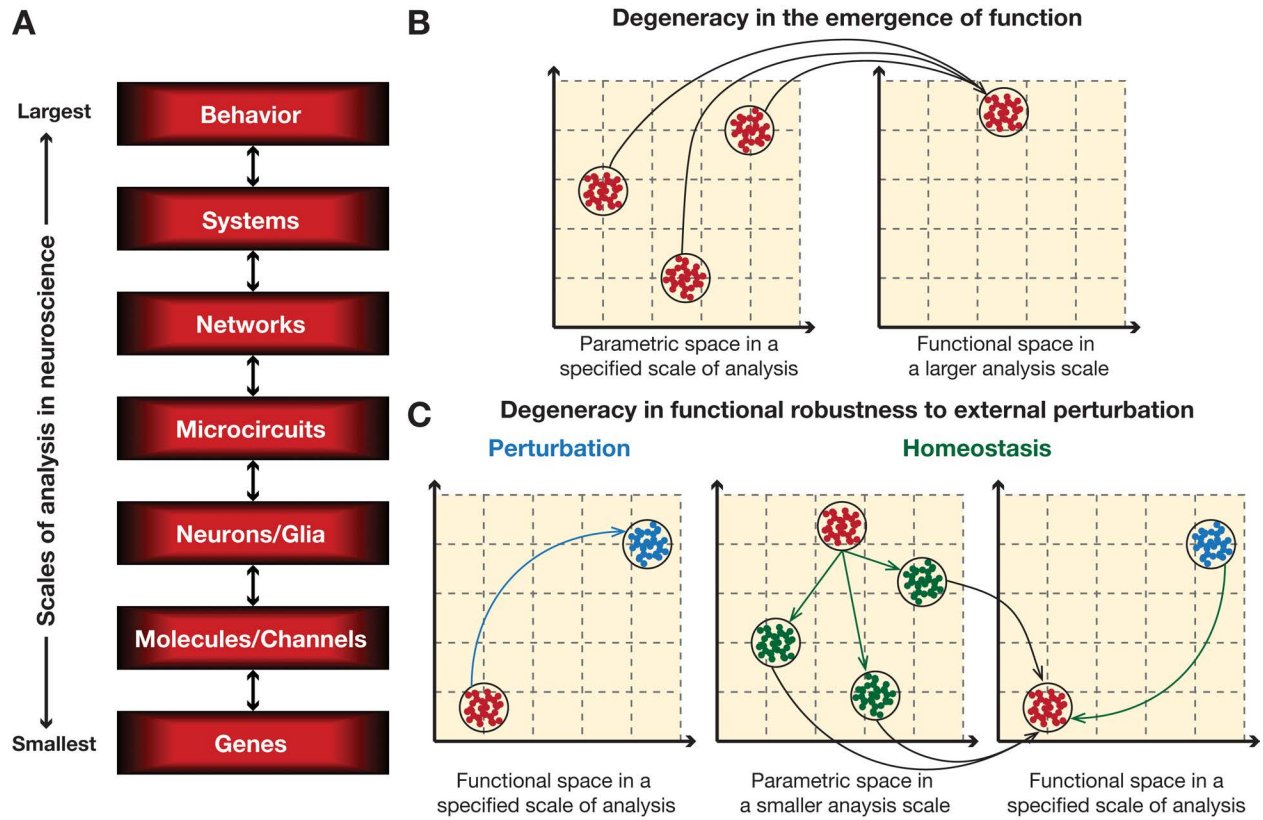

**Rathour and Narayanan: Figure 1**

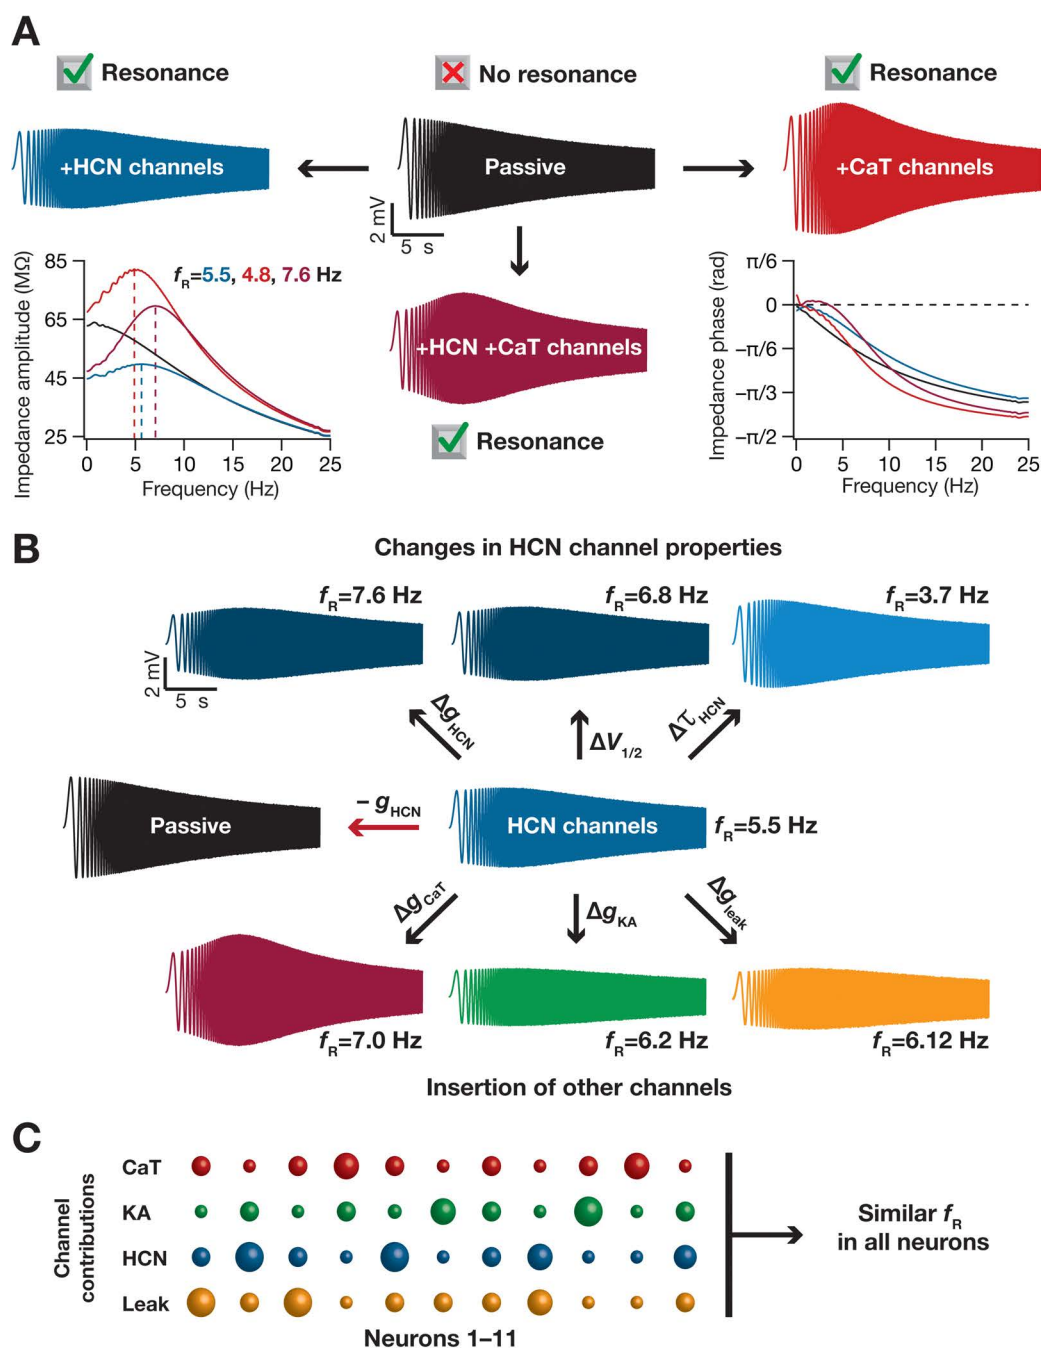

Rathour and Narayanan: Figure 2

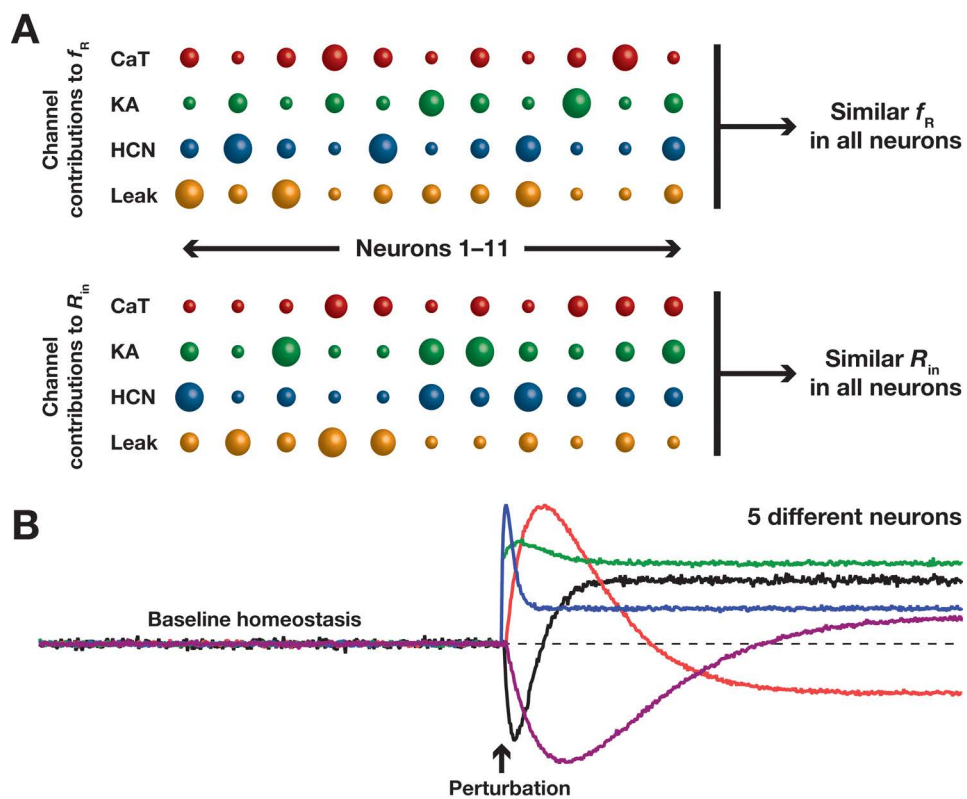

Rathour and Narayanan: Figure 3



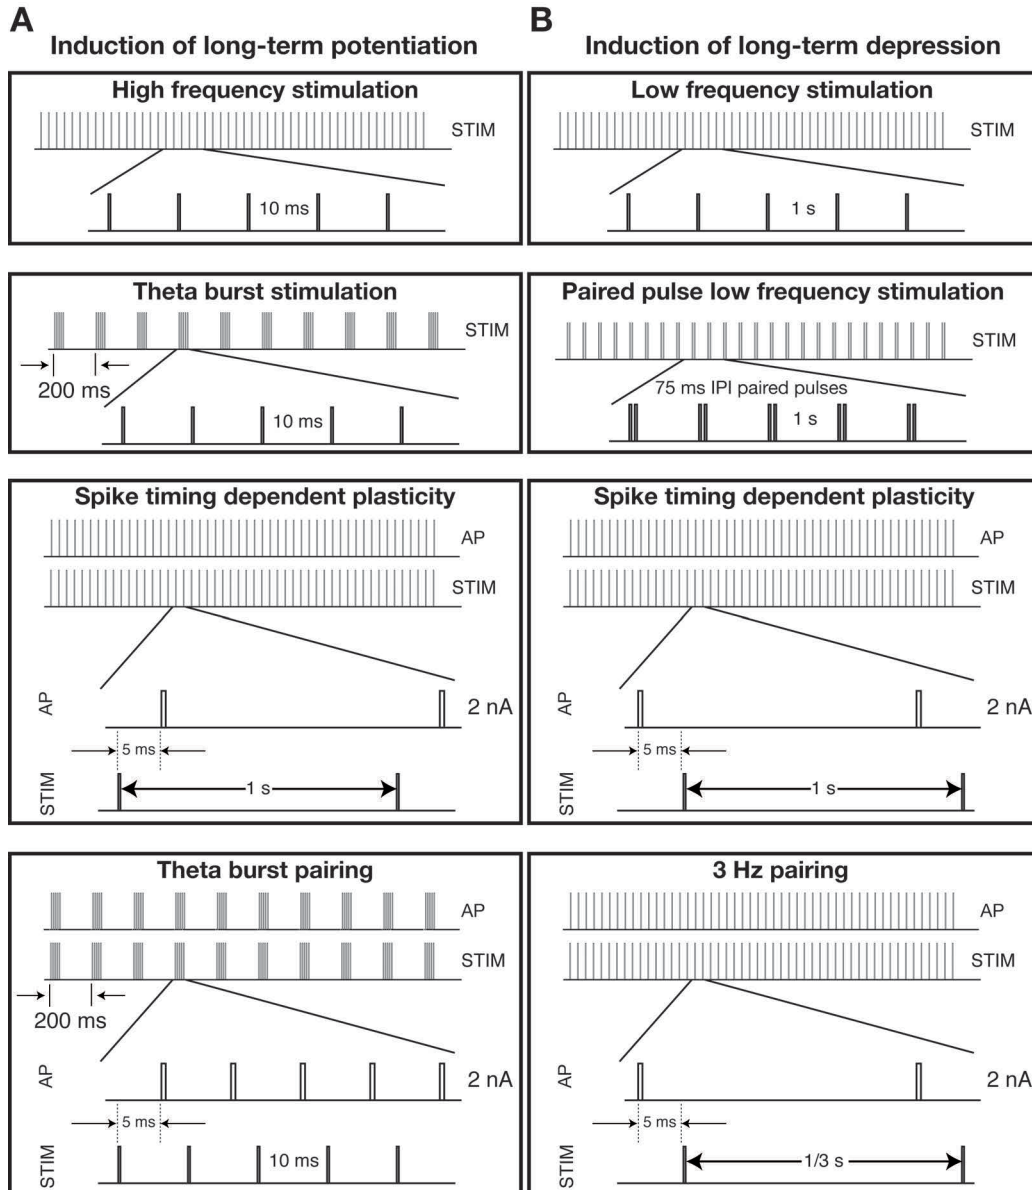

**Rathour and Narayanan: Figure 4**

**A**

Different LTP-induction protocols

|                                   |
|-----------------------------------|
| High frequency stimulation        |
| Theta burst stimulation           |
| Theta burst pairing               |
| Spike-timing dependent plasticity |
| Plateau potentials                |
| Pathway interactions              |
| Pharmacological depolarization    |

Disparate mechanisms governing the strength and kinetics of calcium elevation

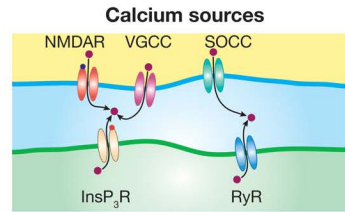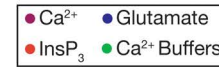

Synergistic Interactions

Calcium-handling mechanisms

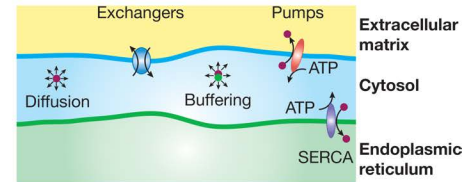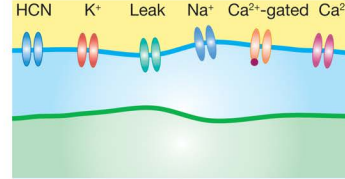

Mechanisms regulating excitability

**B**

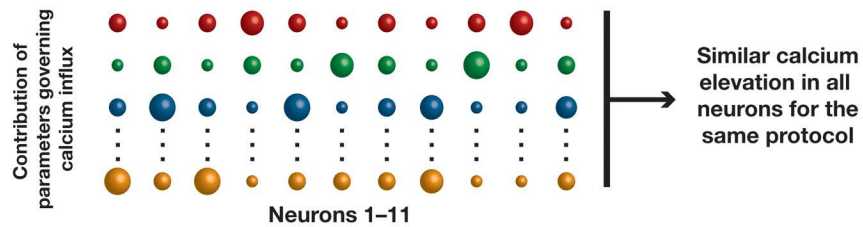

**Rathour and Narayanan: Figure 5**

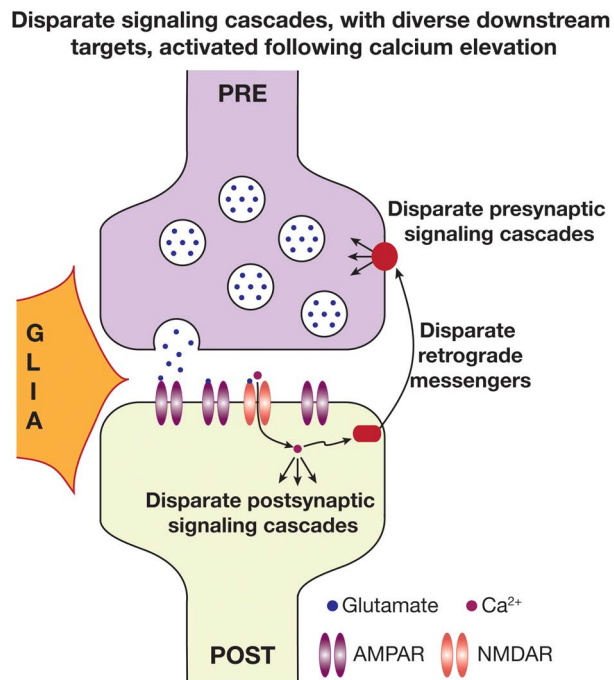

**Rathour and Narayanan: Figure 6**

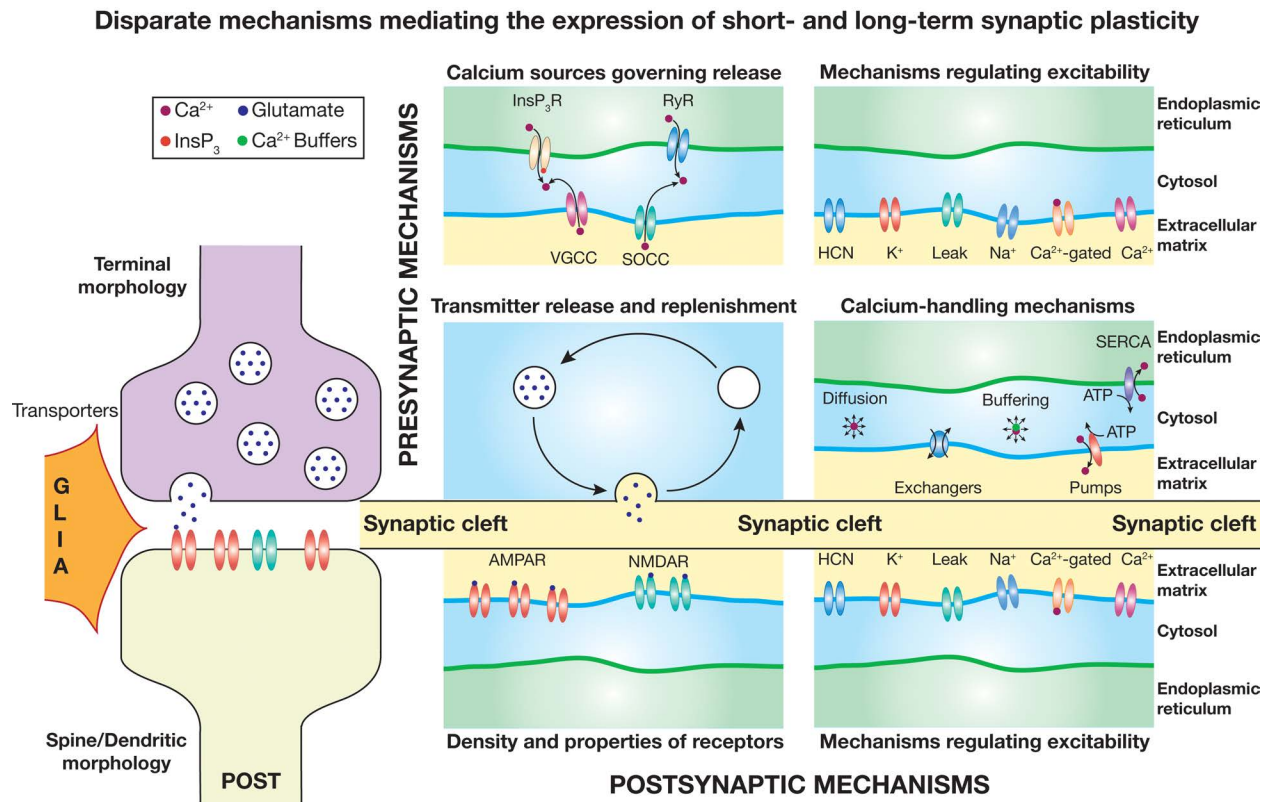

**Rathour and Narayanan: Figure 7**

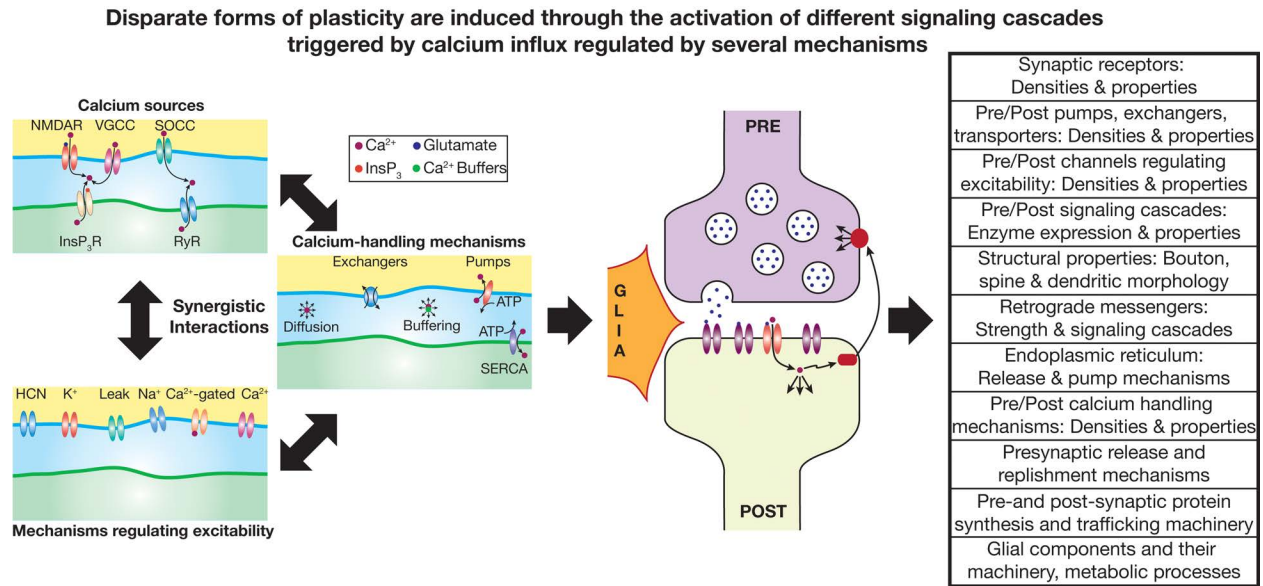

**Rathour and Narayanan: Figure 8**

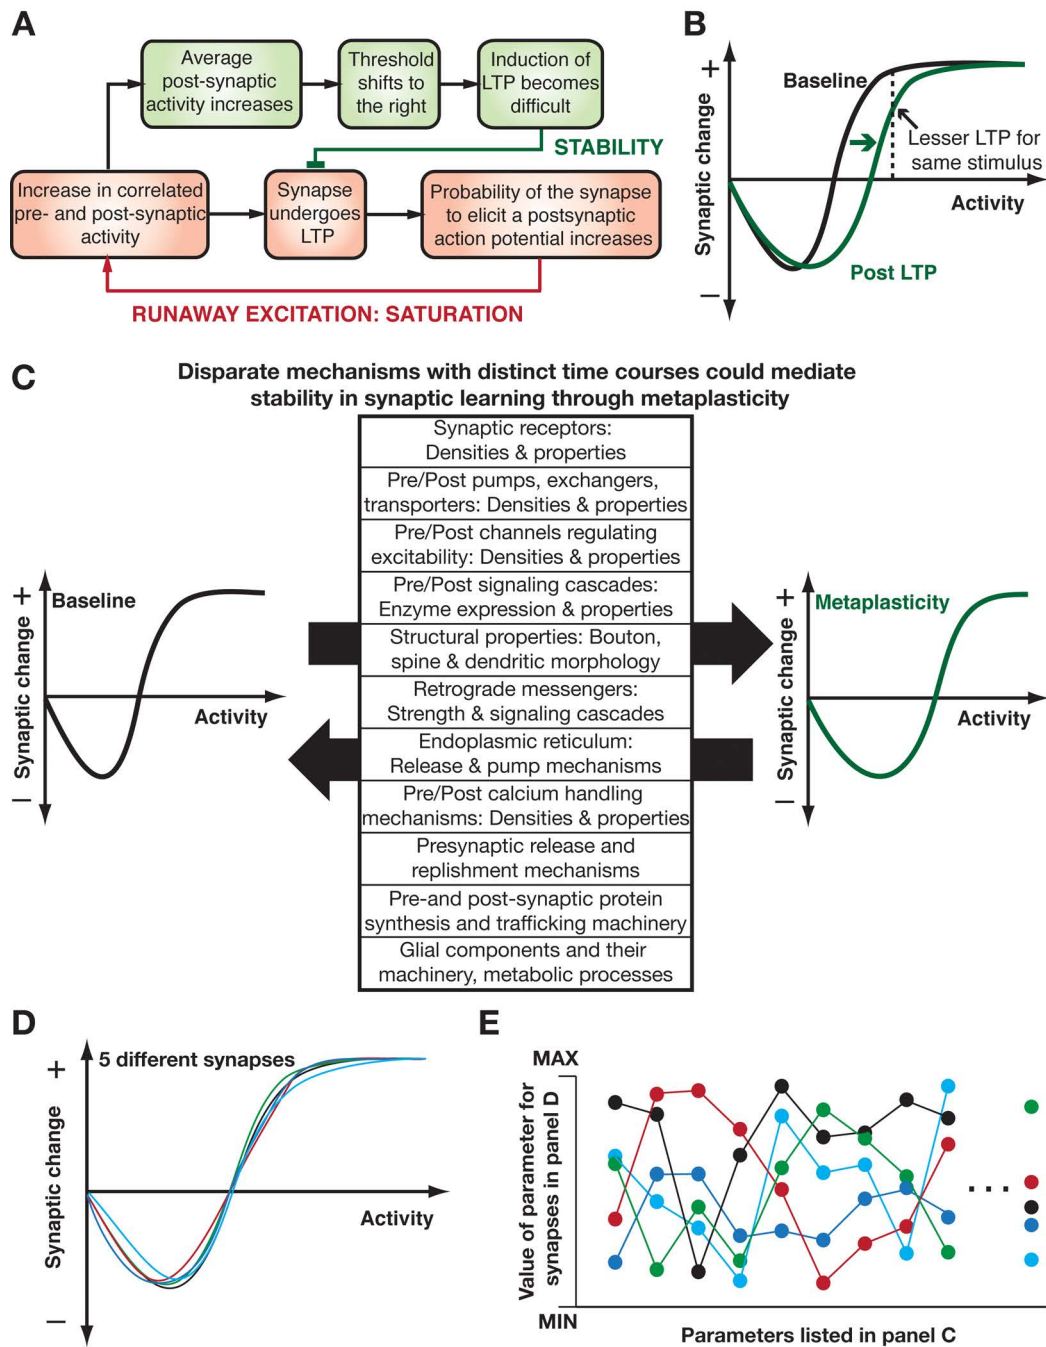

Rathour and Narayanan: Figure 9
